# Supplementary material
Source: MDPI journal article supplement (https://www.mdpi.com/2218-6581/12/6/154)

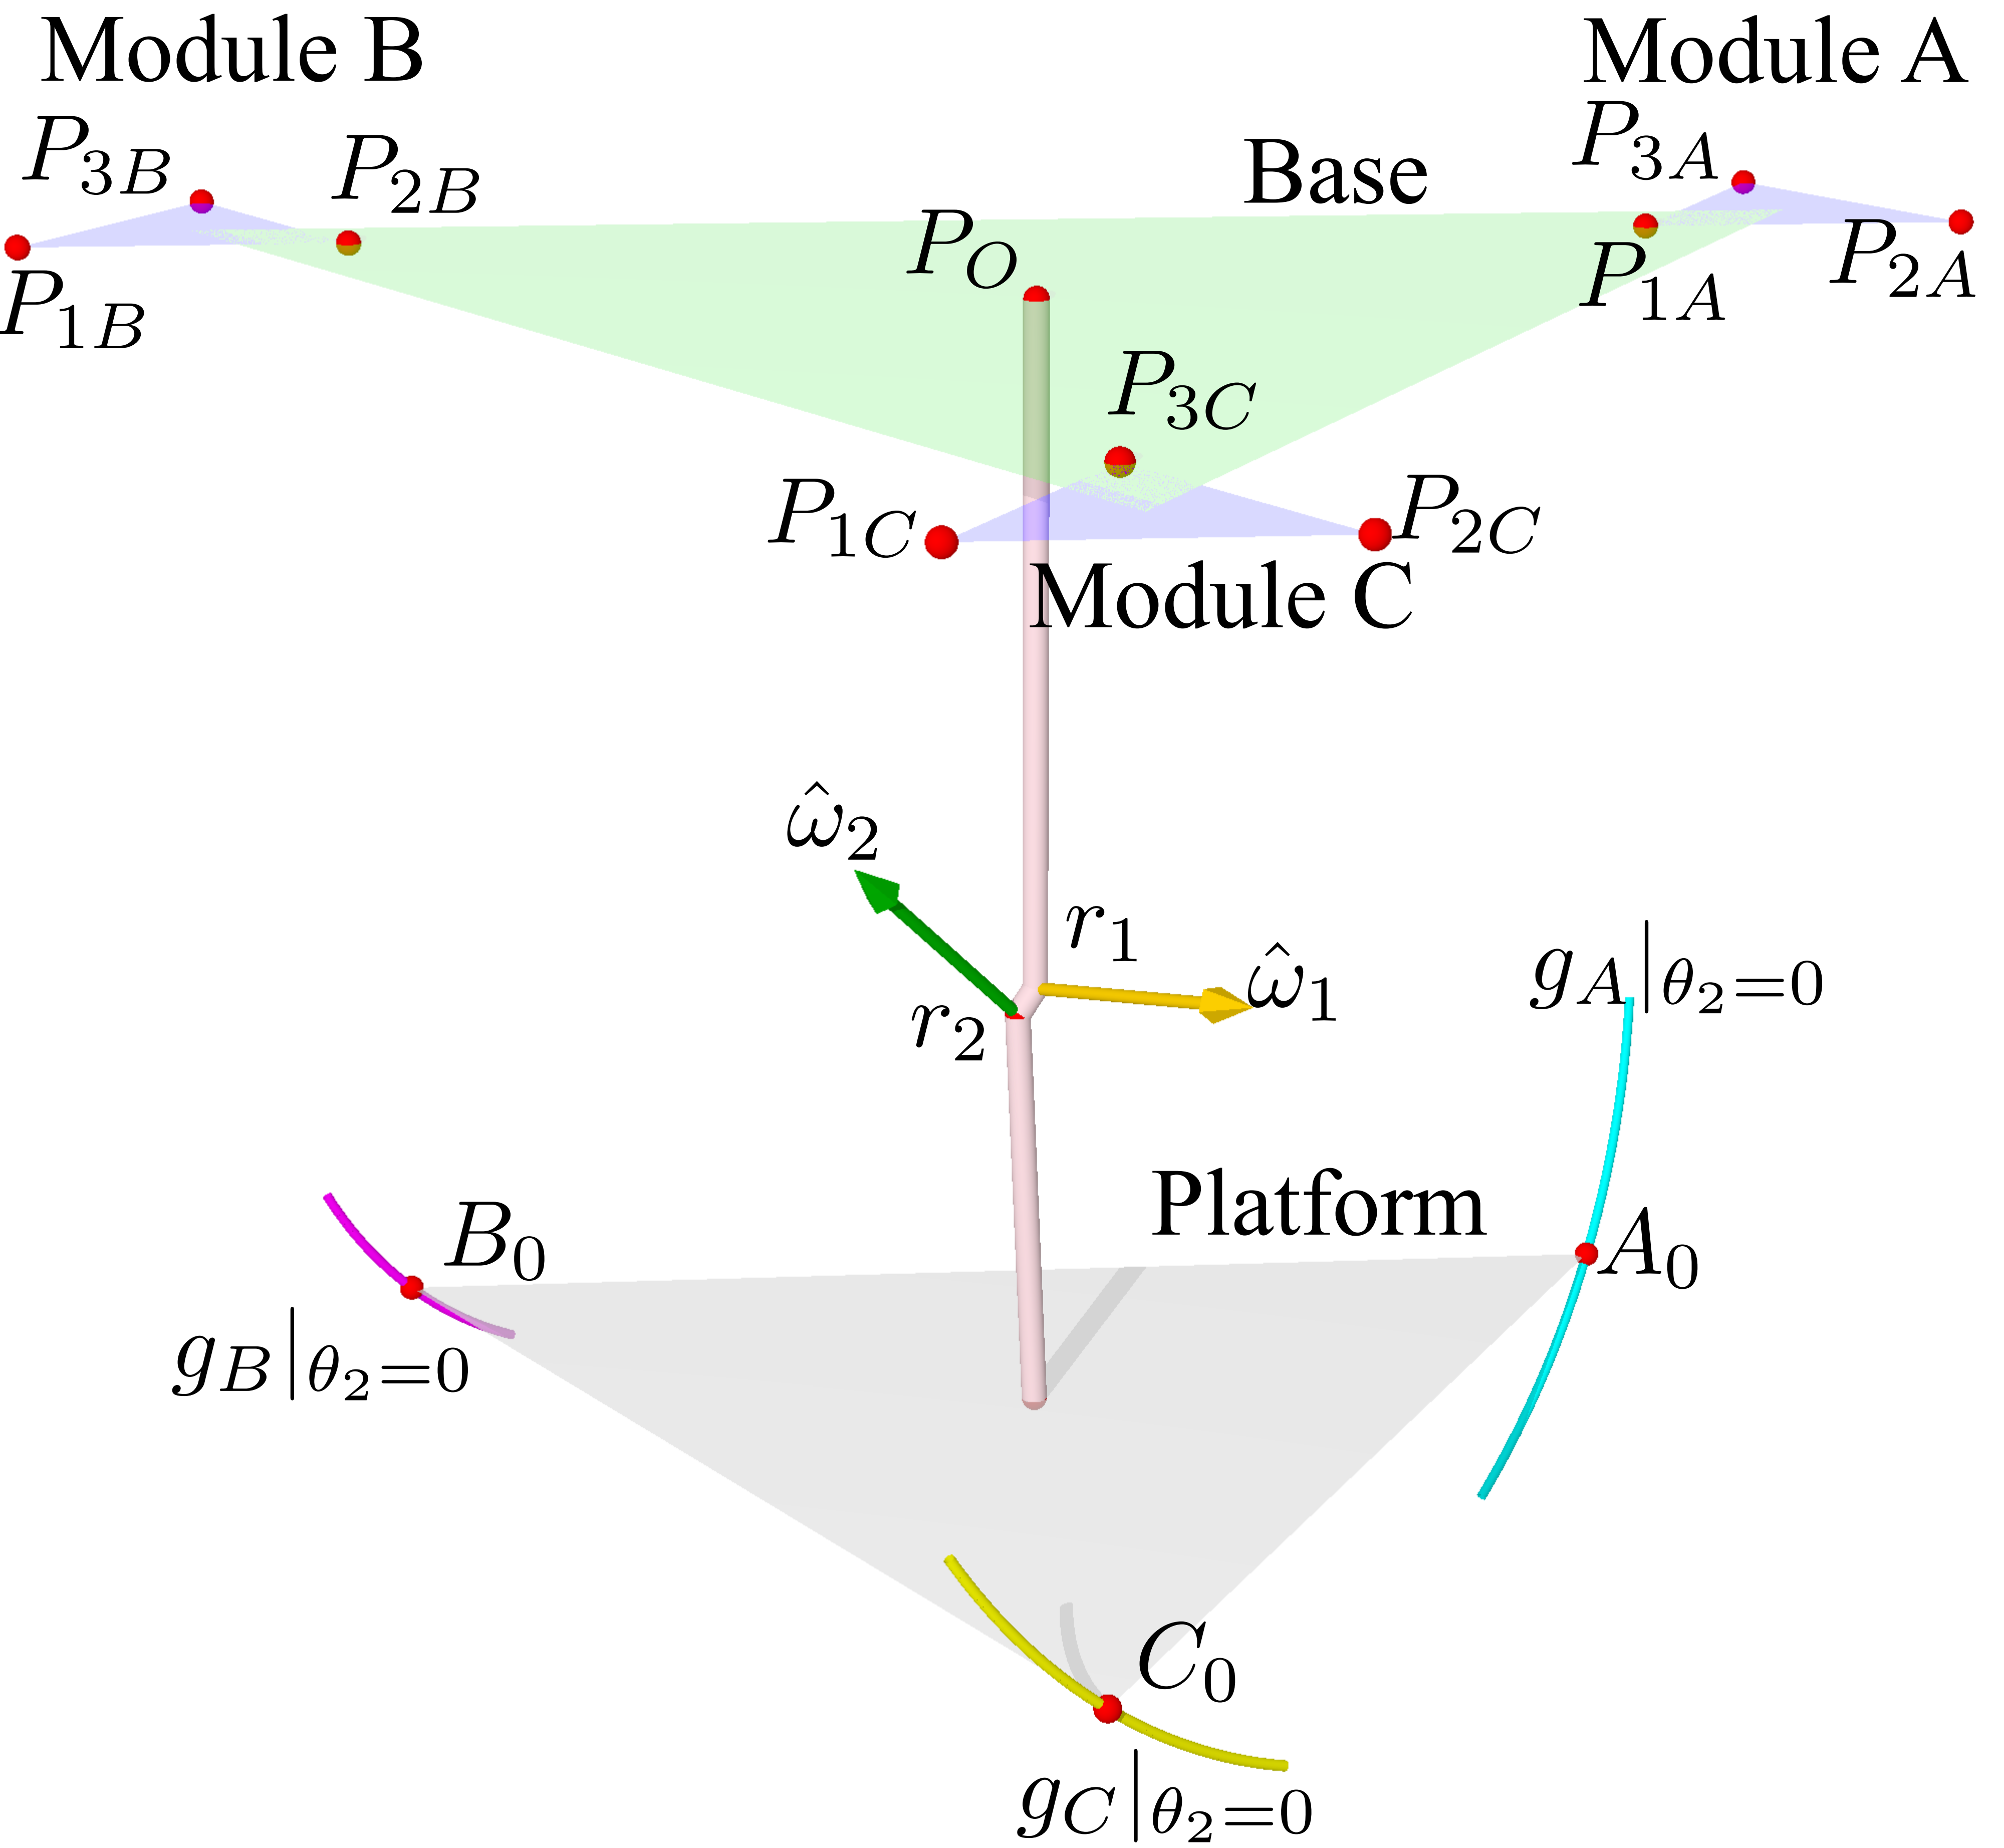

Supplement: s1 [file s1]

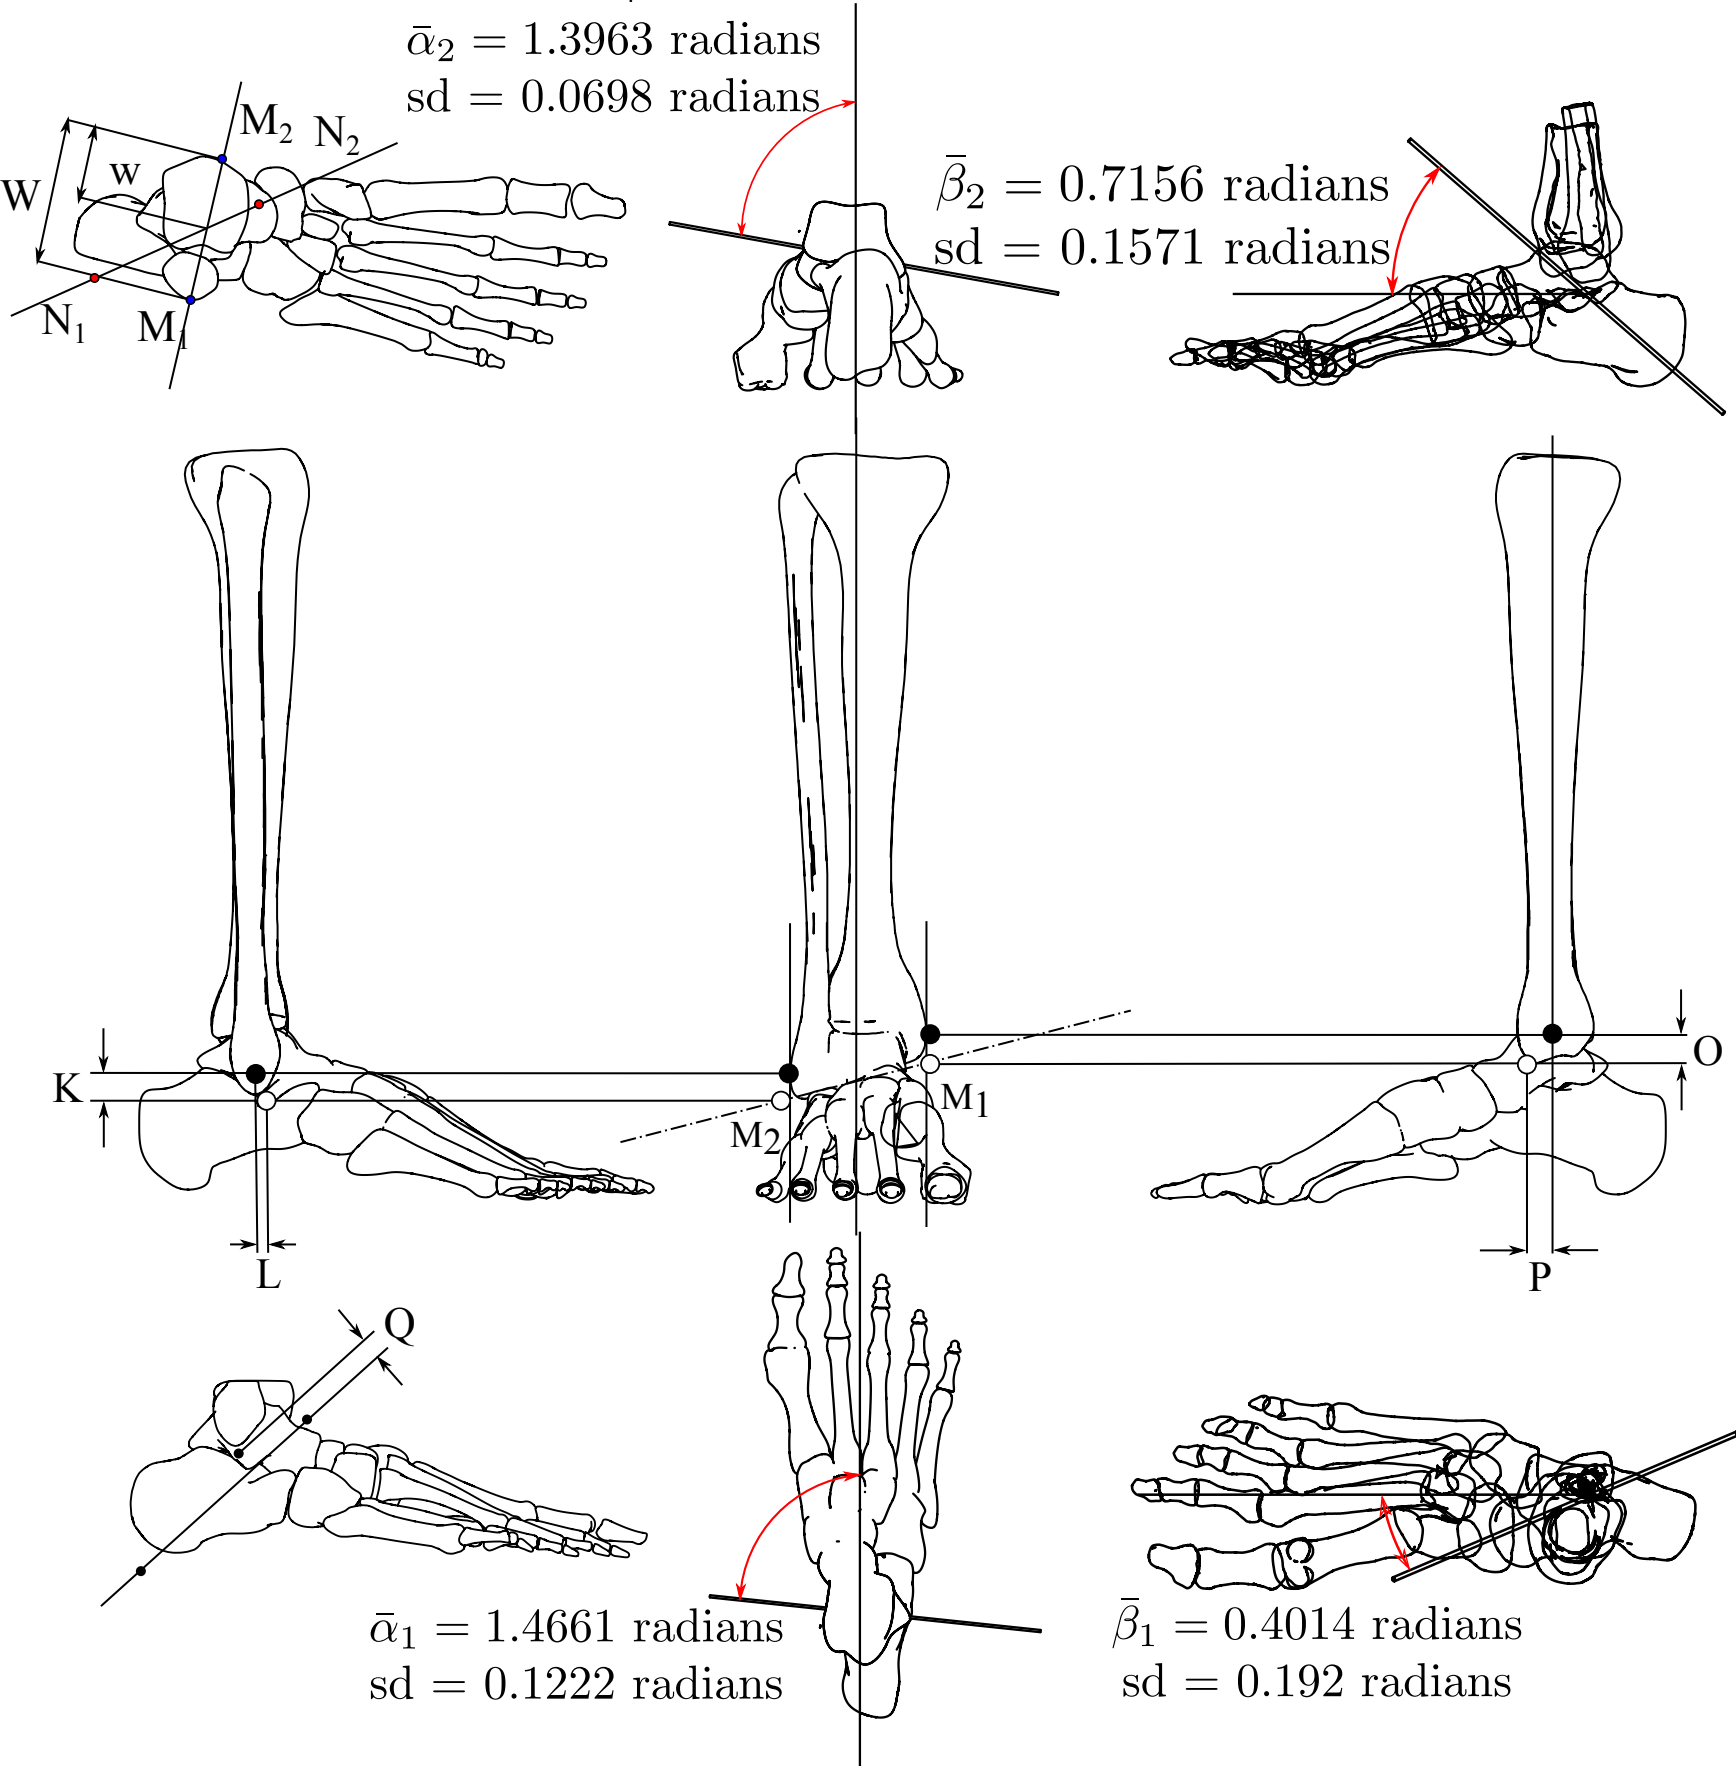

Supplement: s1 [file s1]

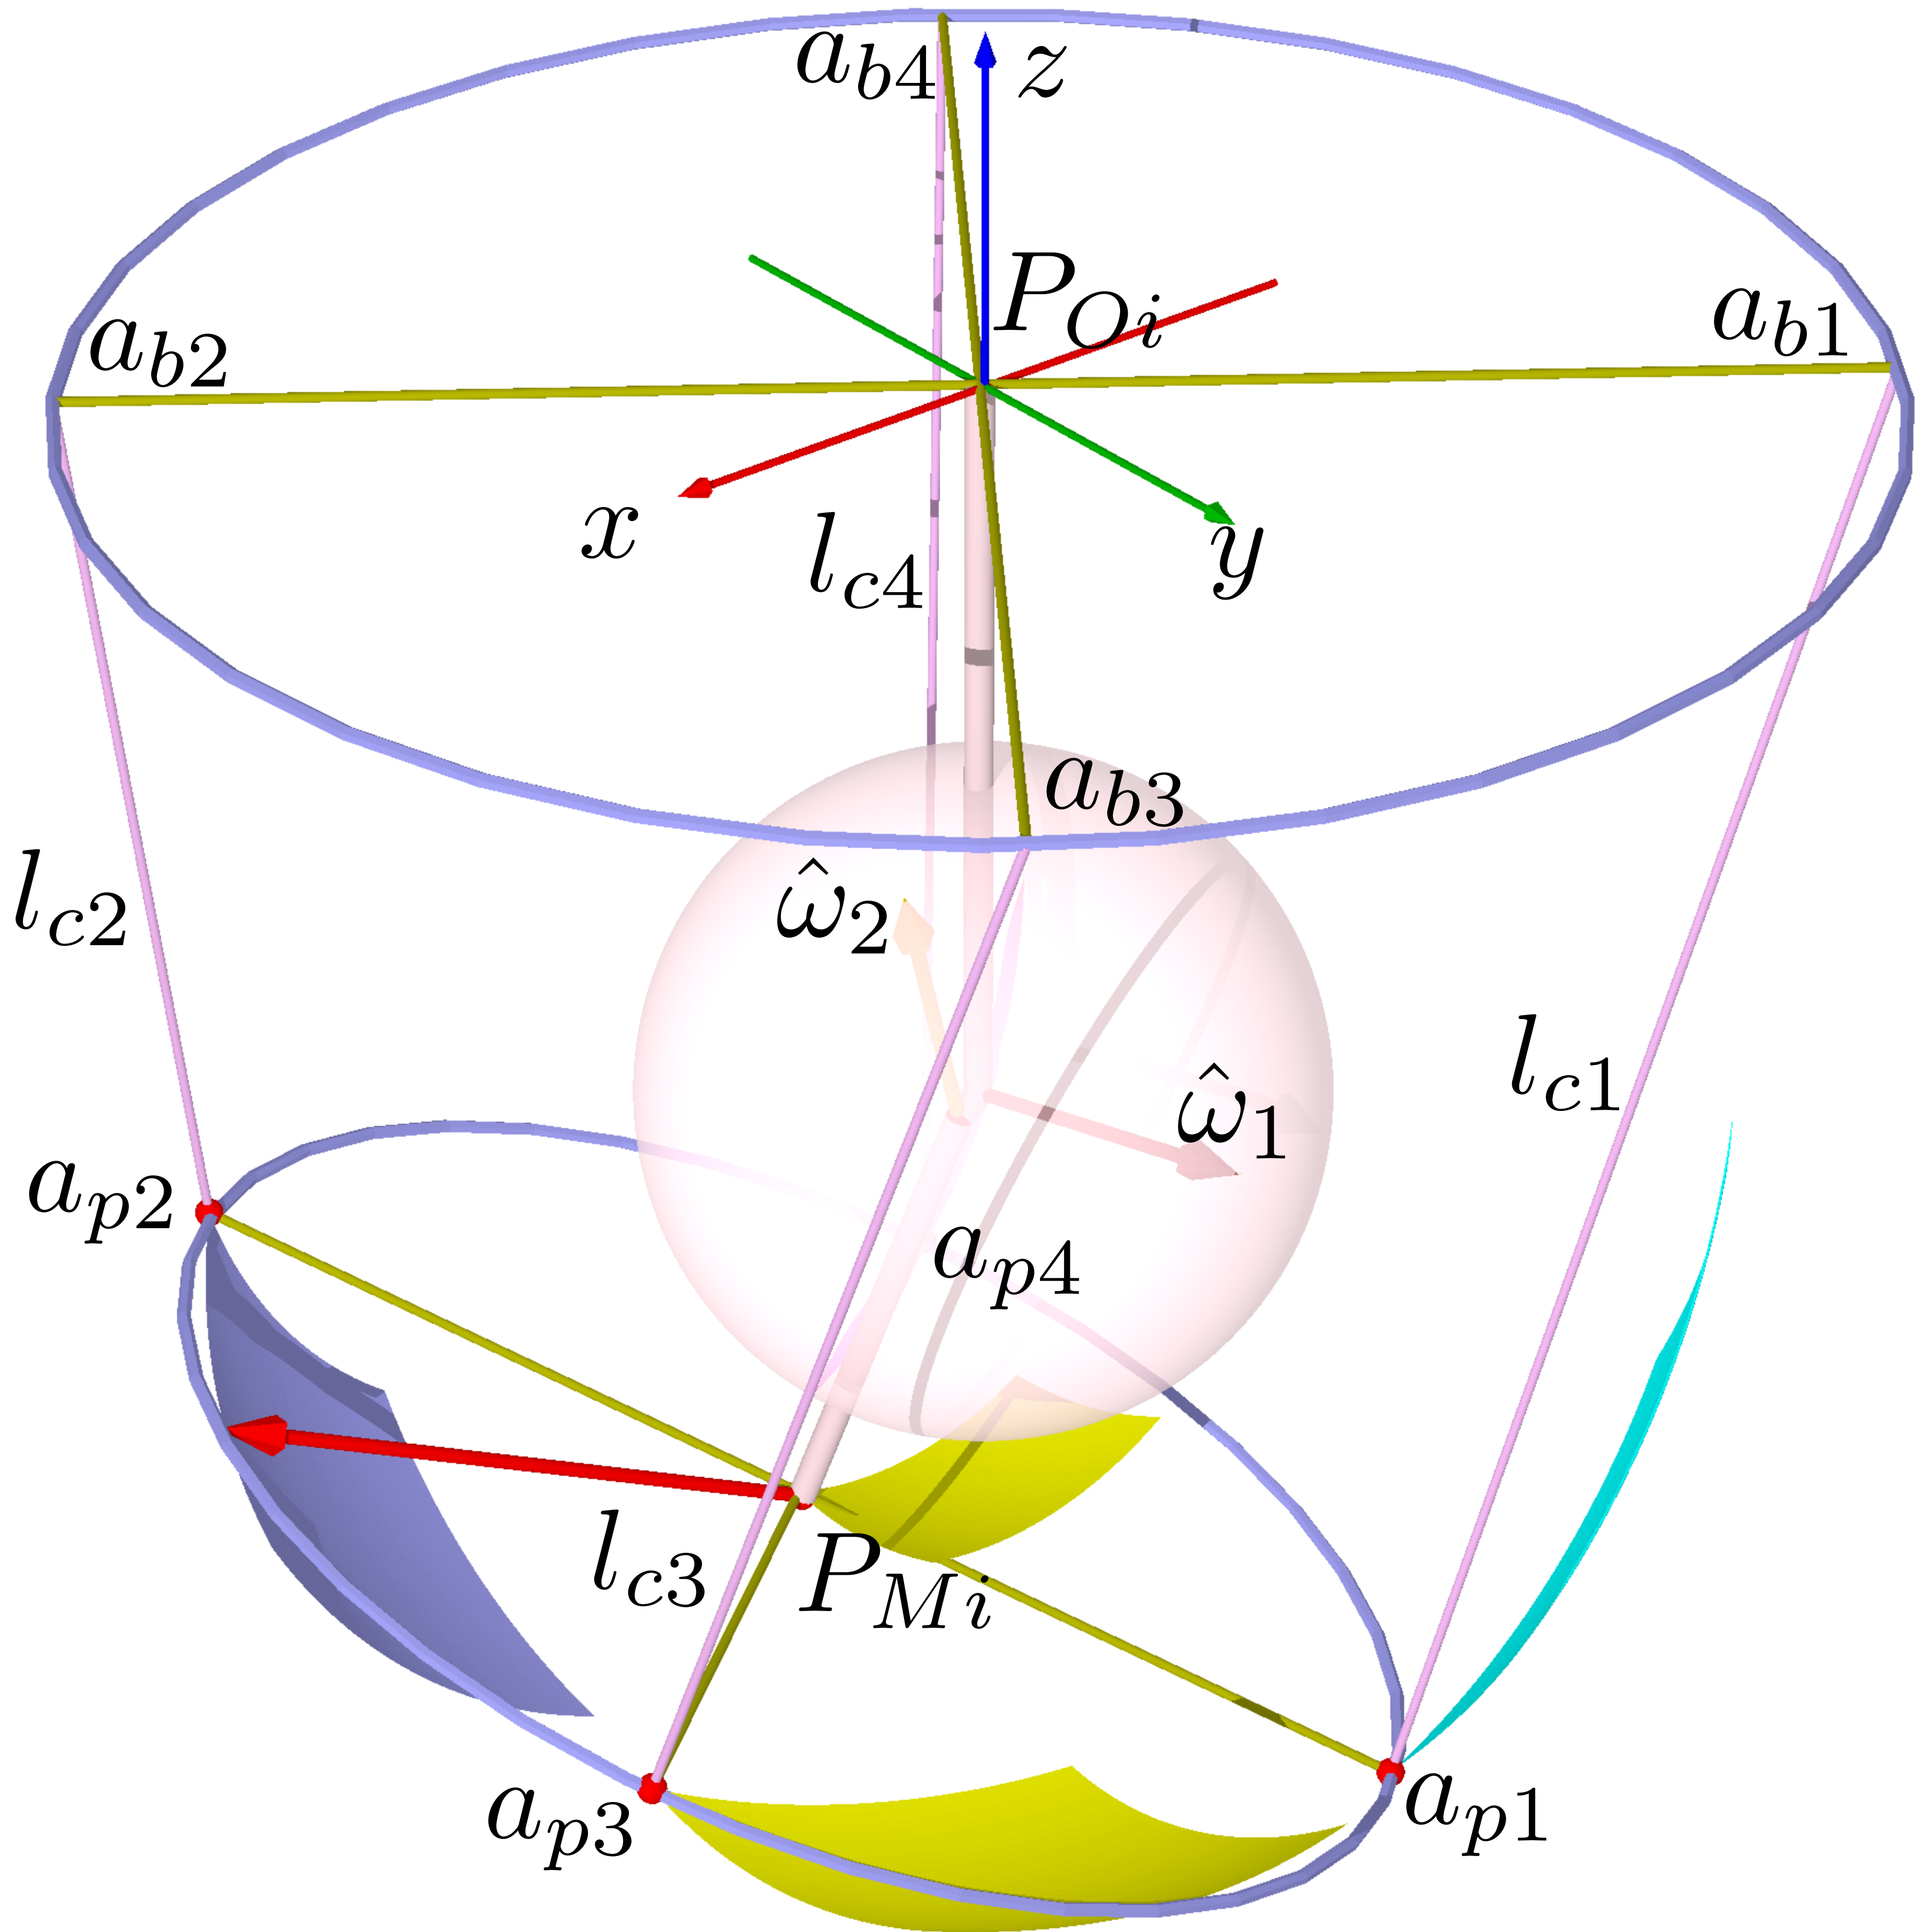

Supplement: s1 [file s1]

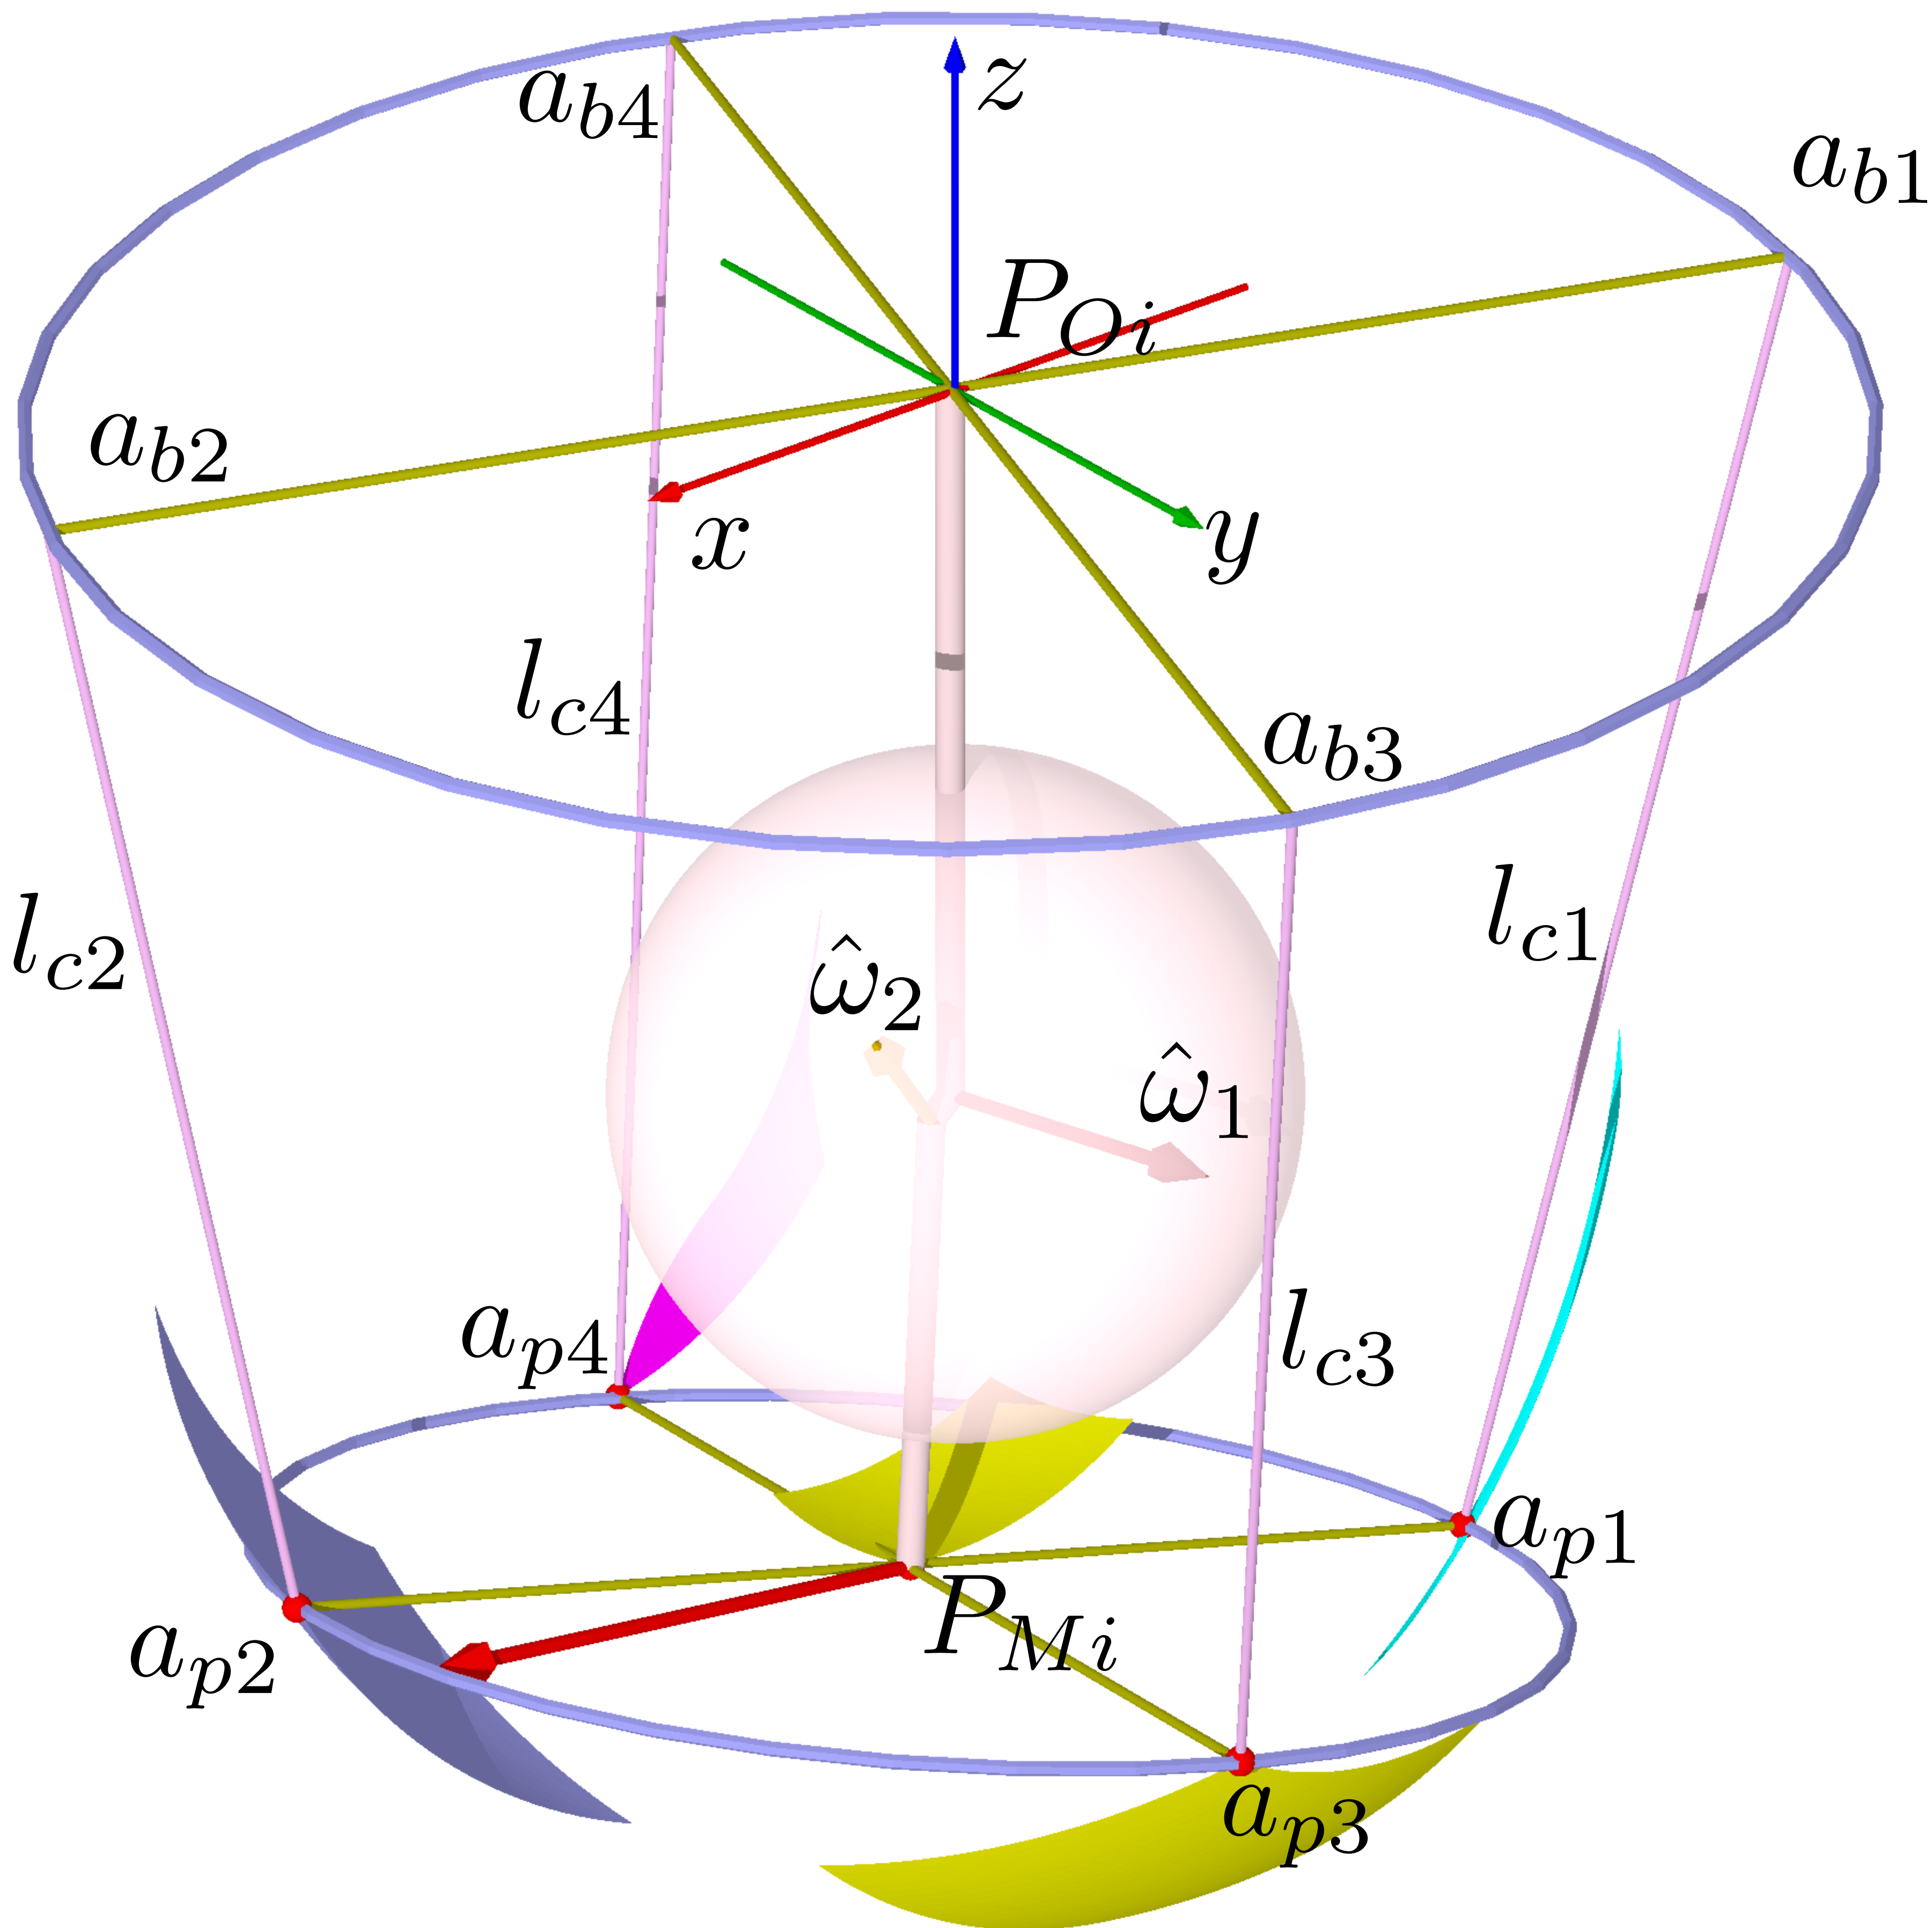

Supplement: s1 [file s1]

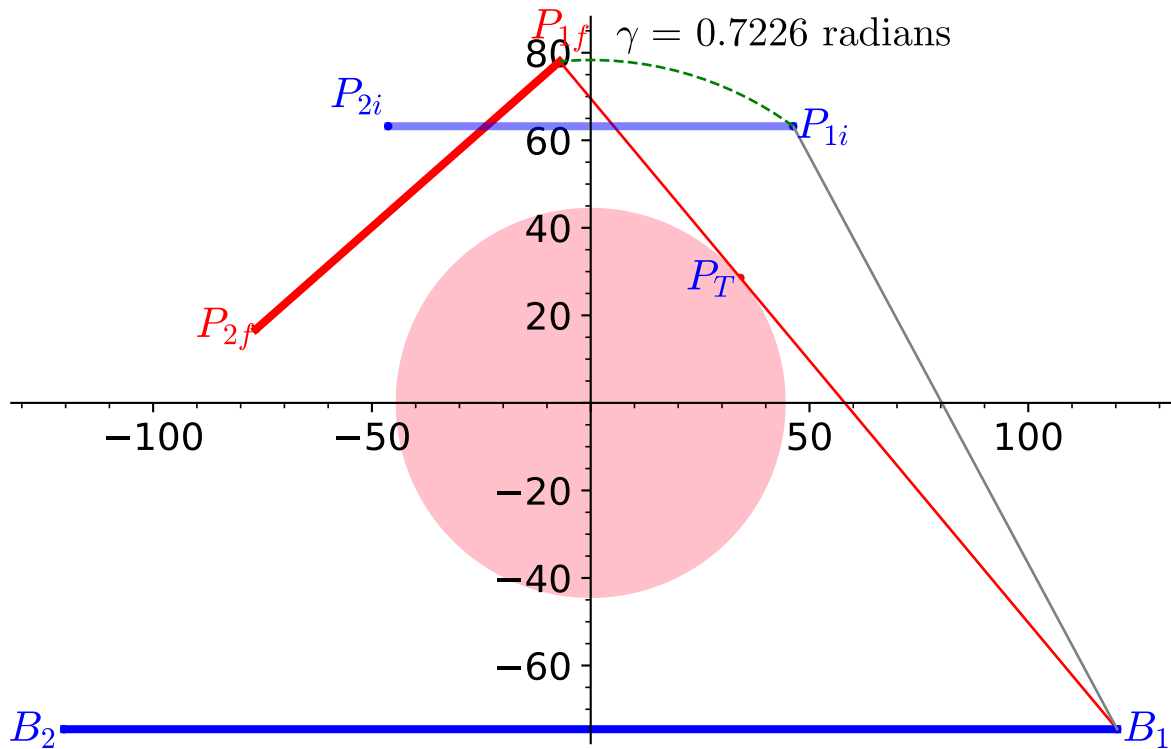

Supplement: s1 [file s1]

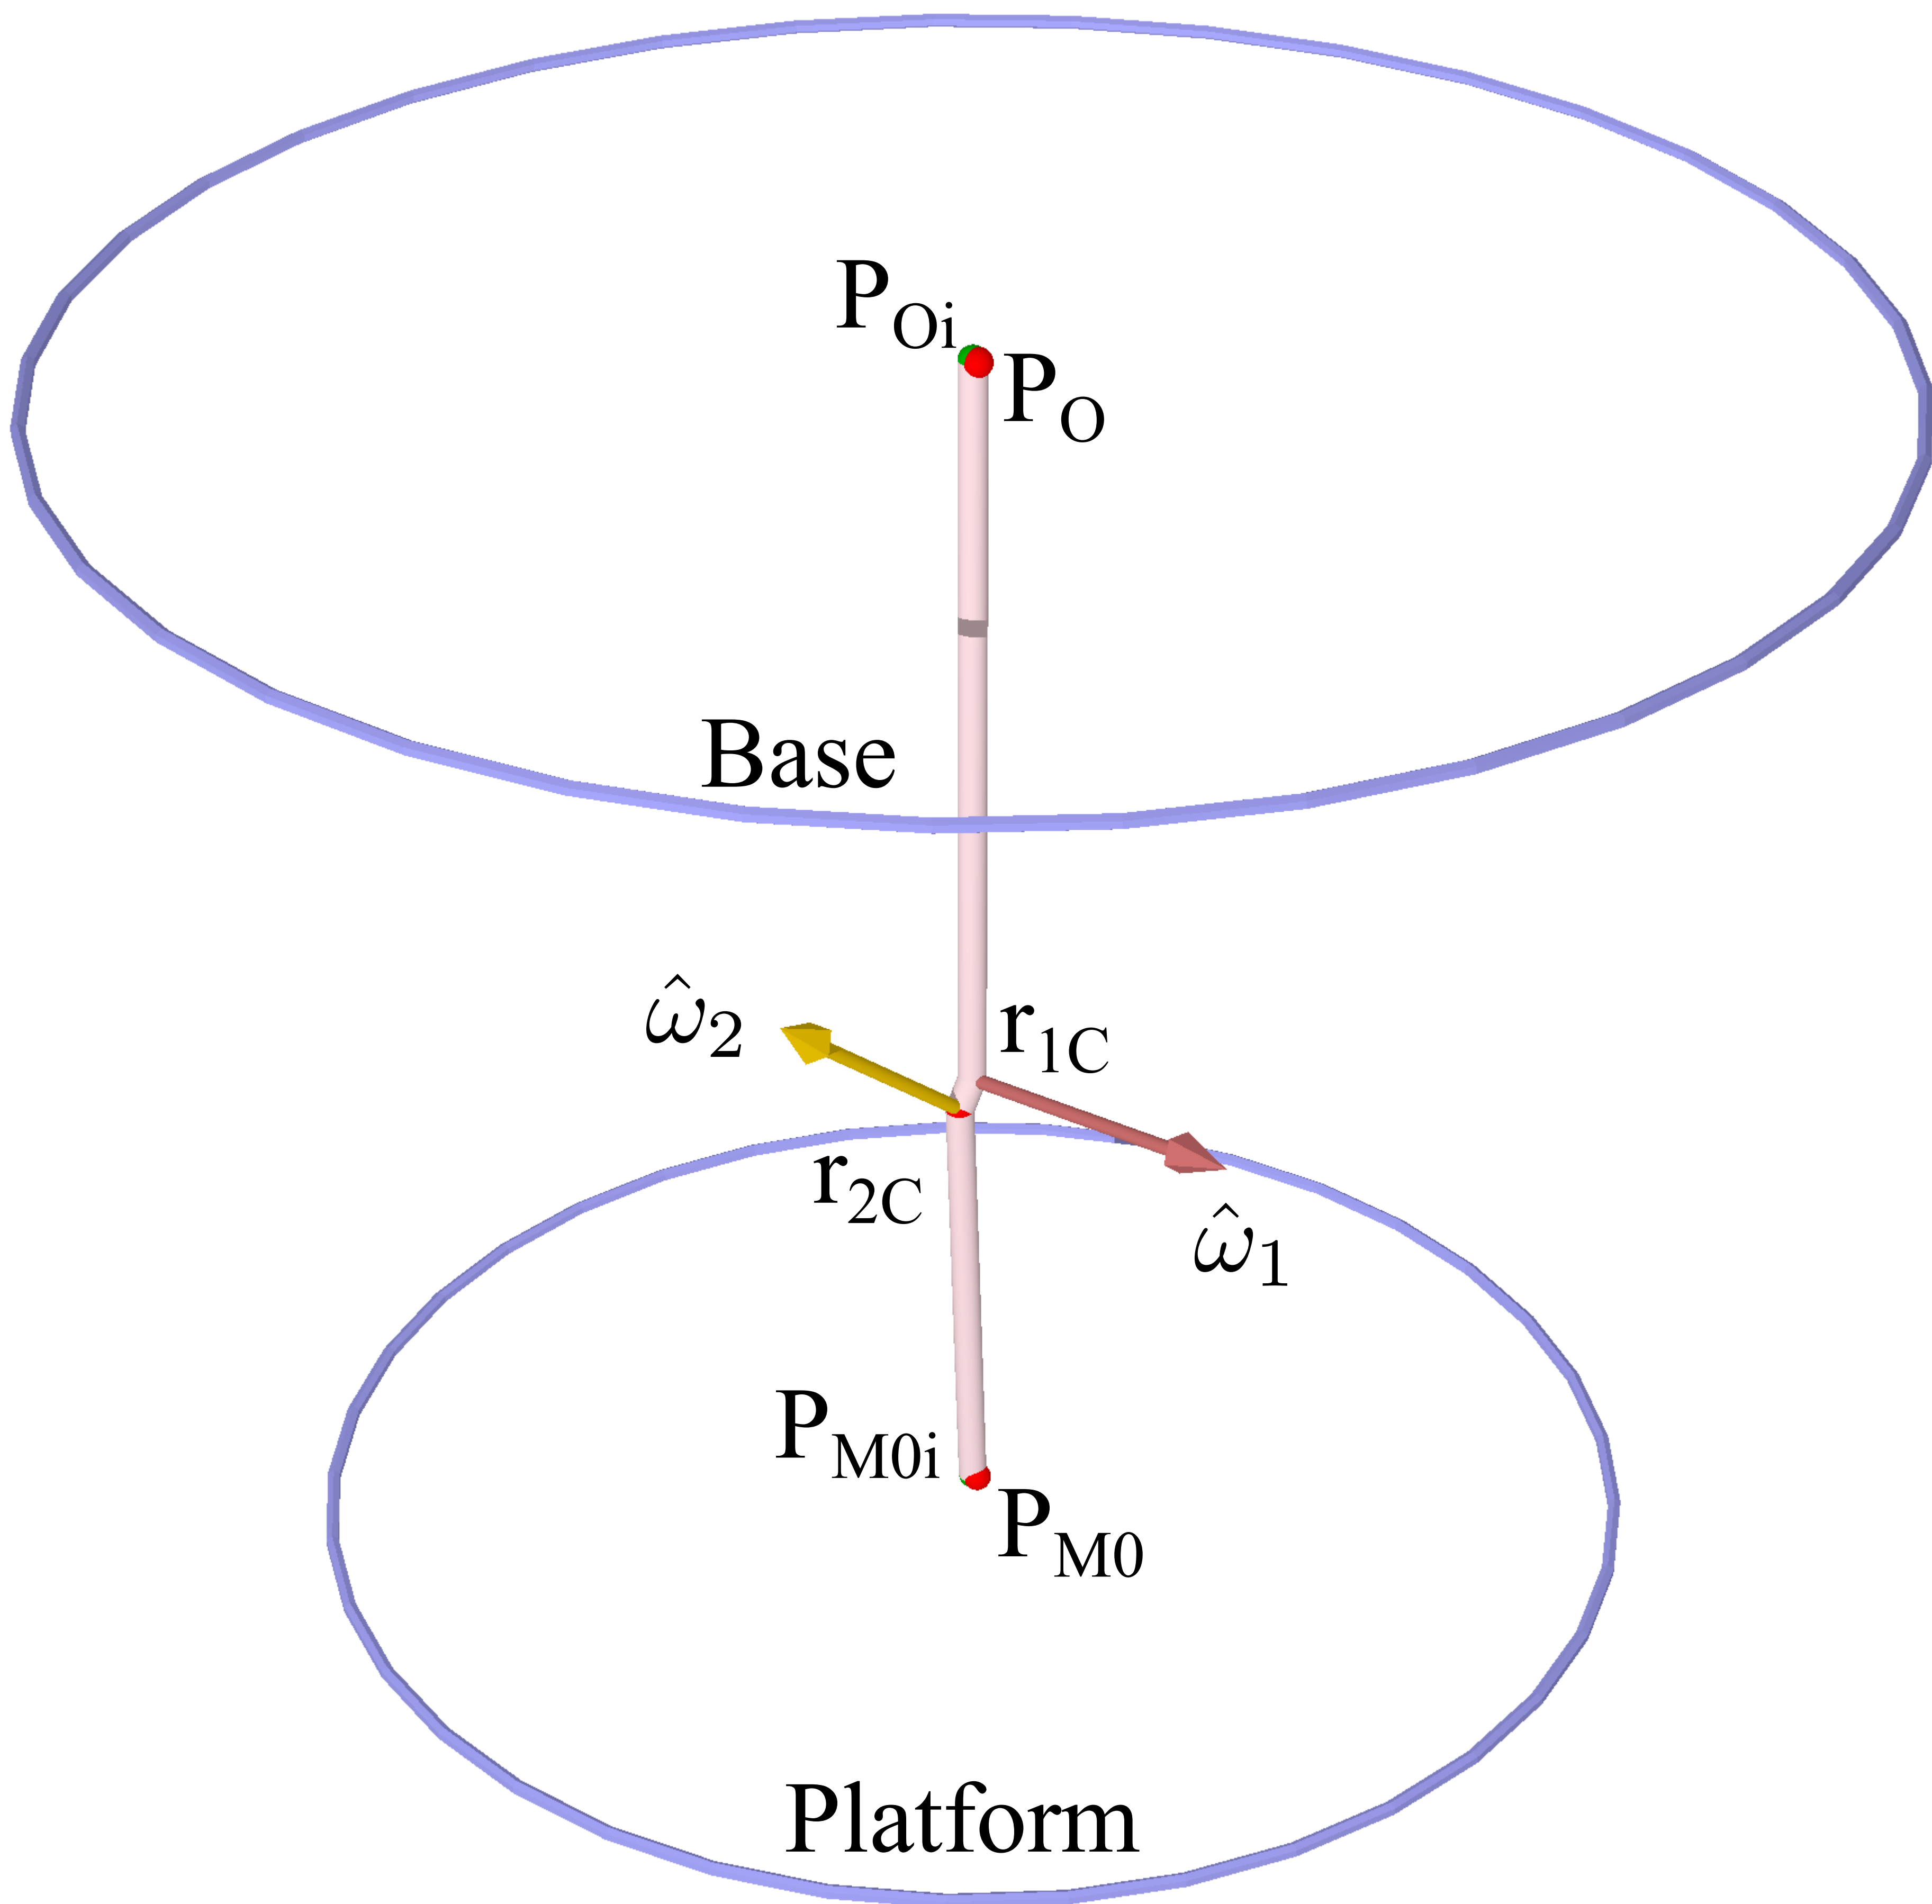

Supplement: s1 [file s1]

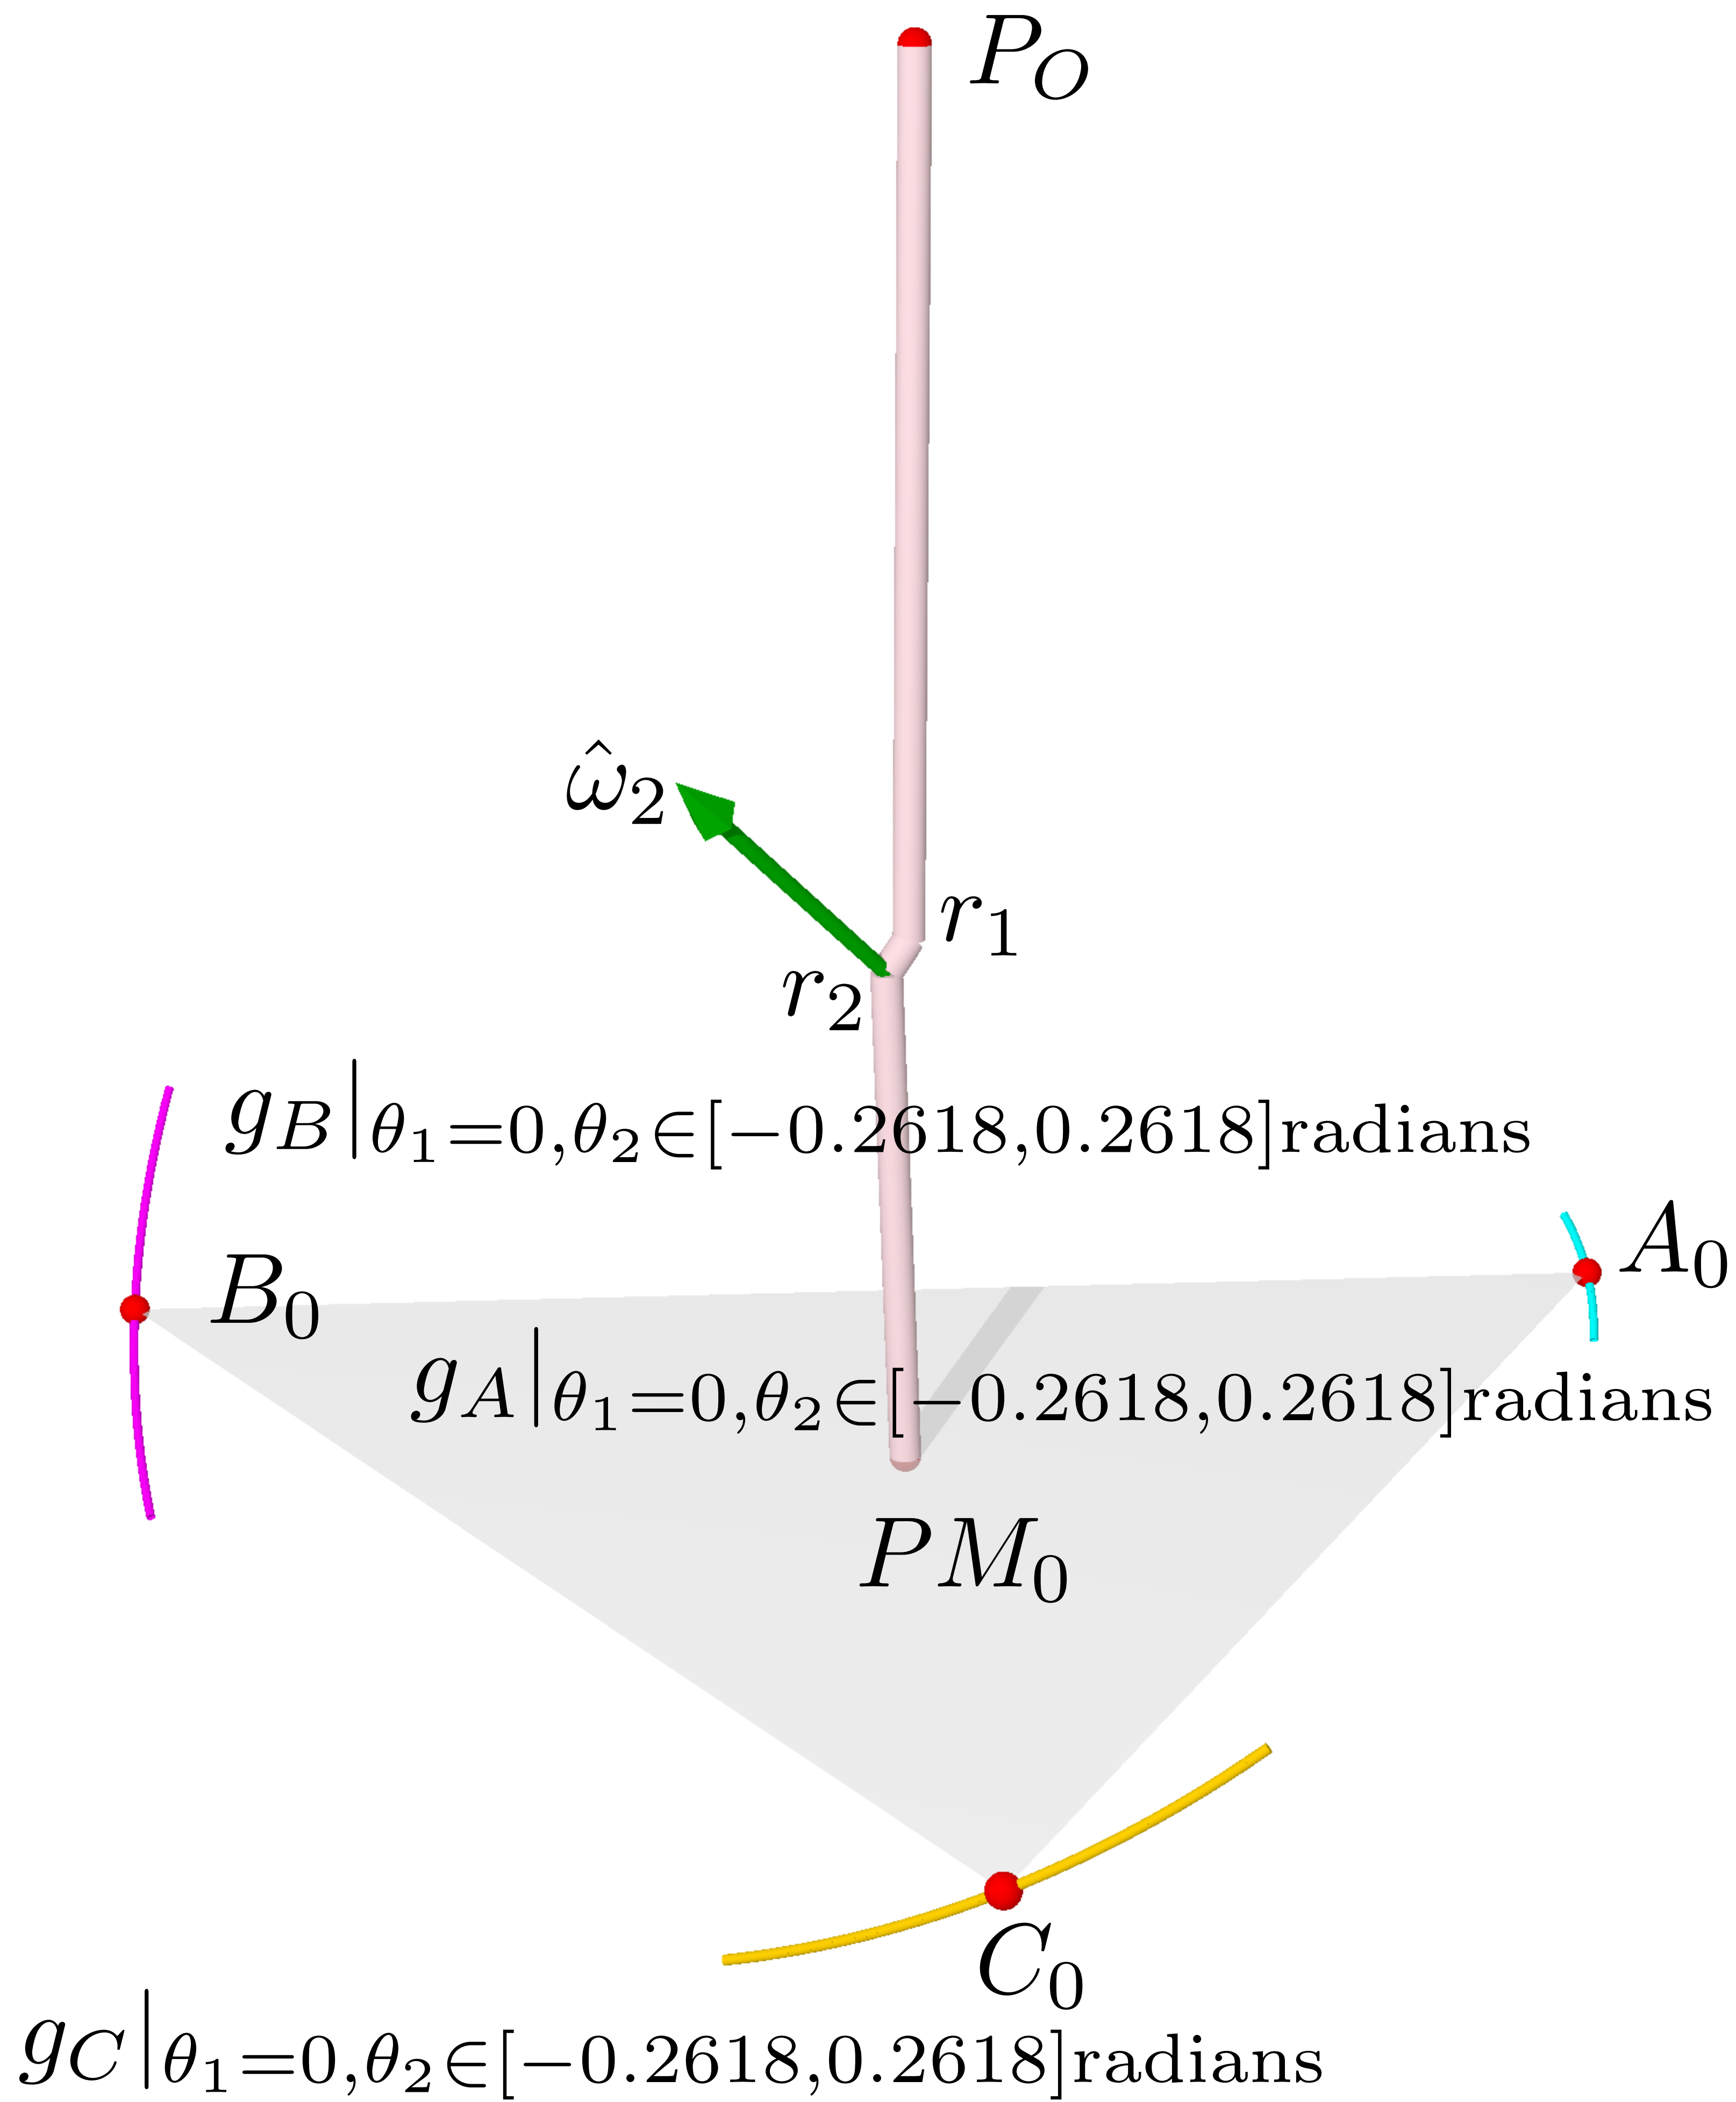

Supplement: s1 [file s1]

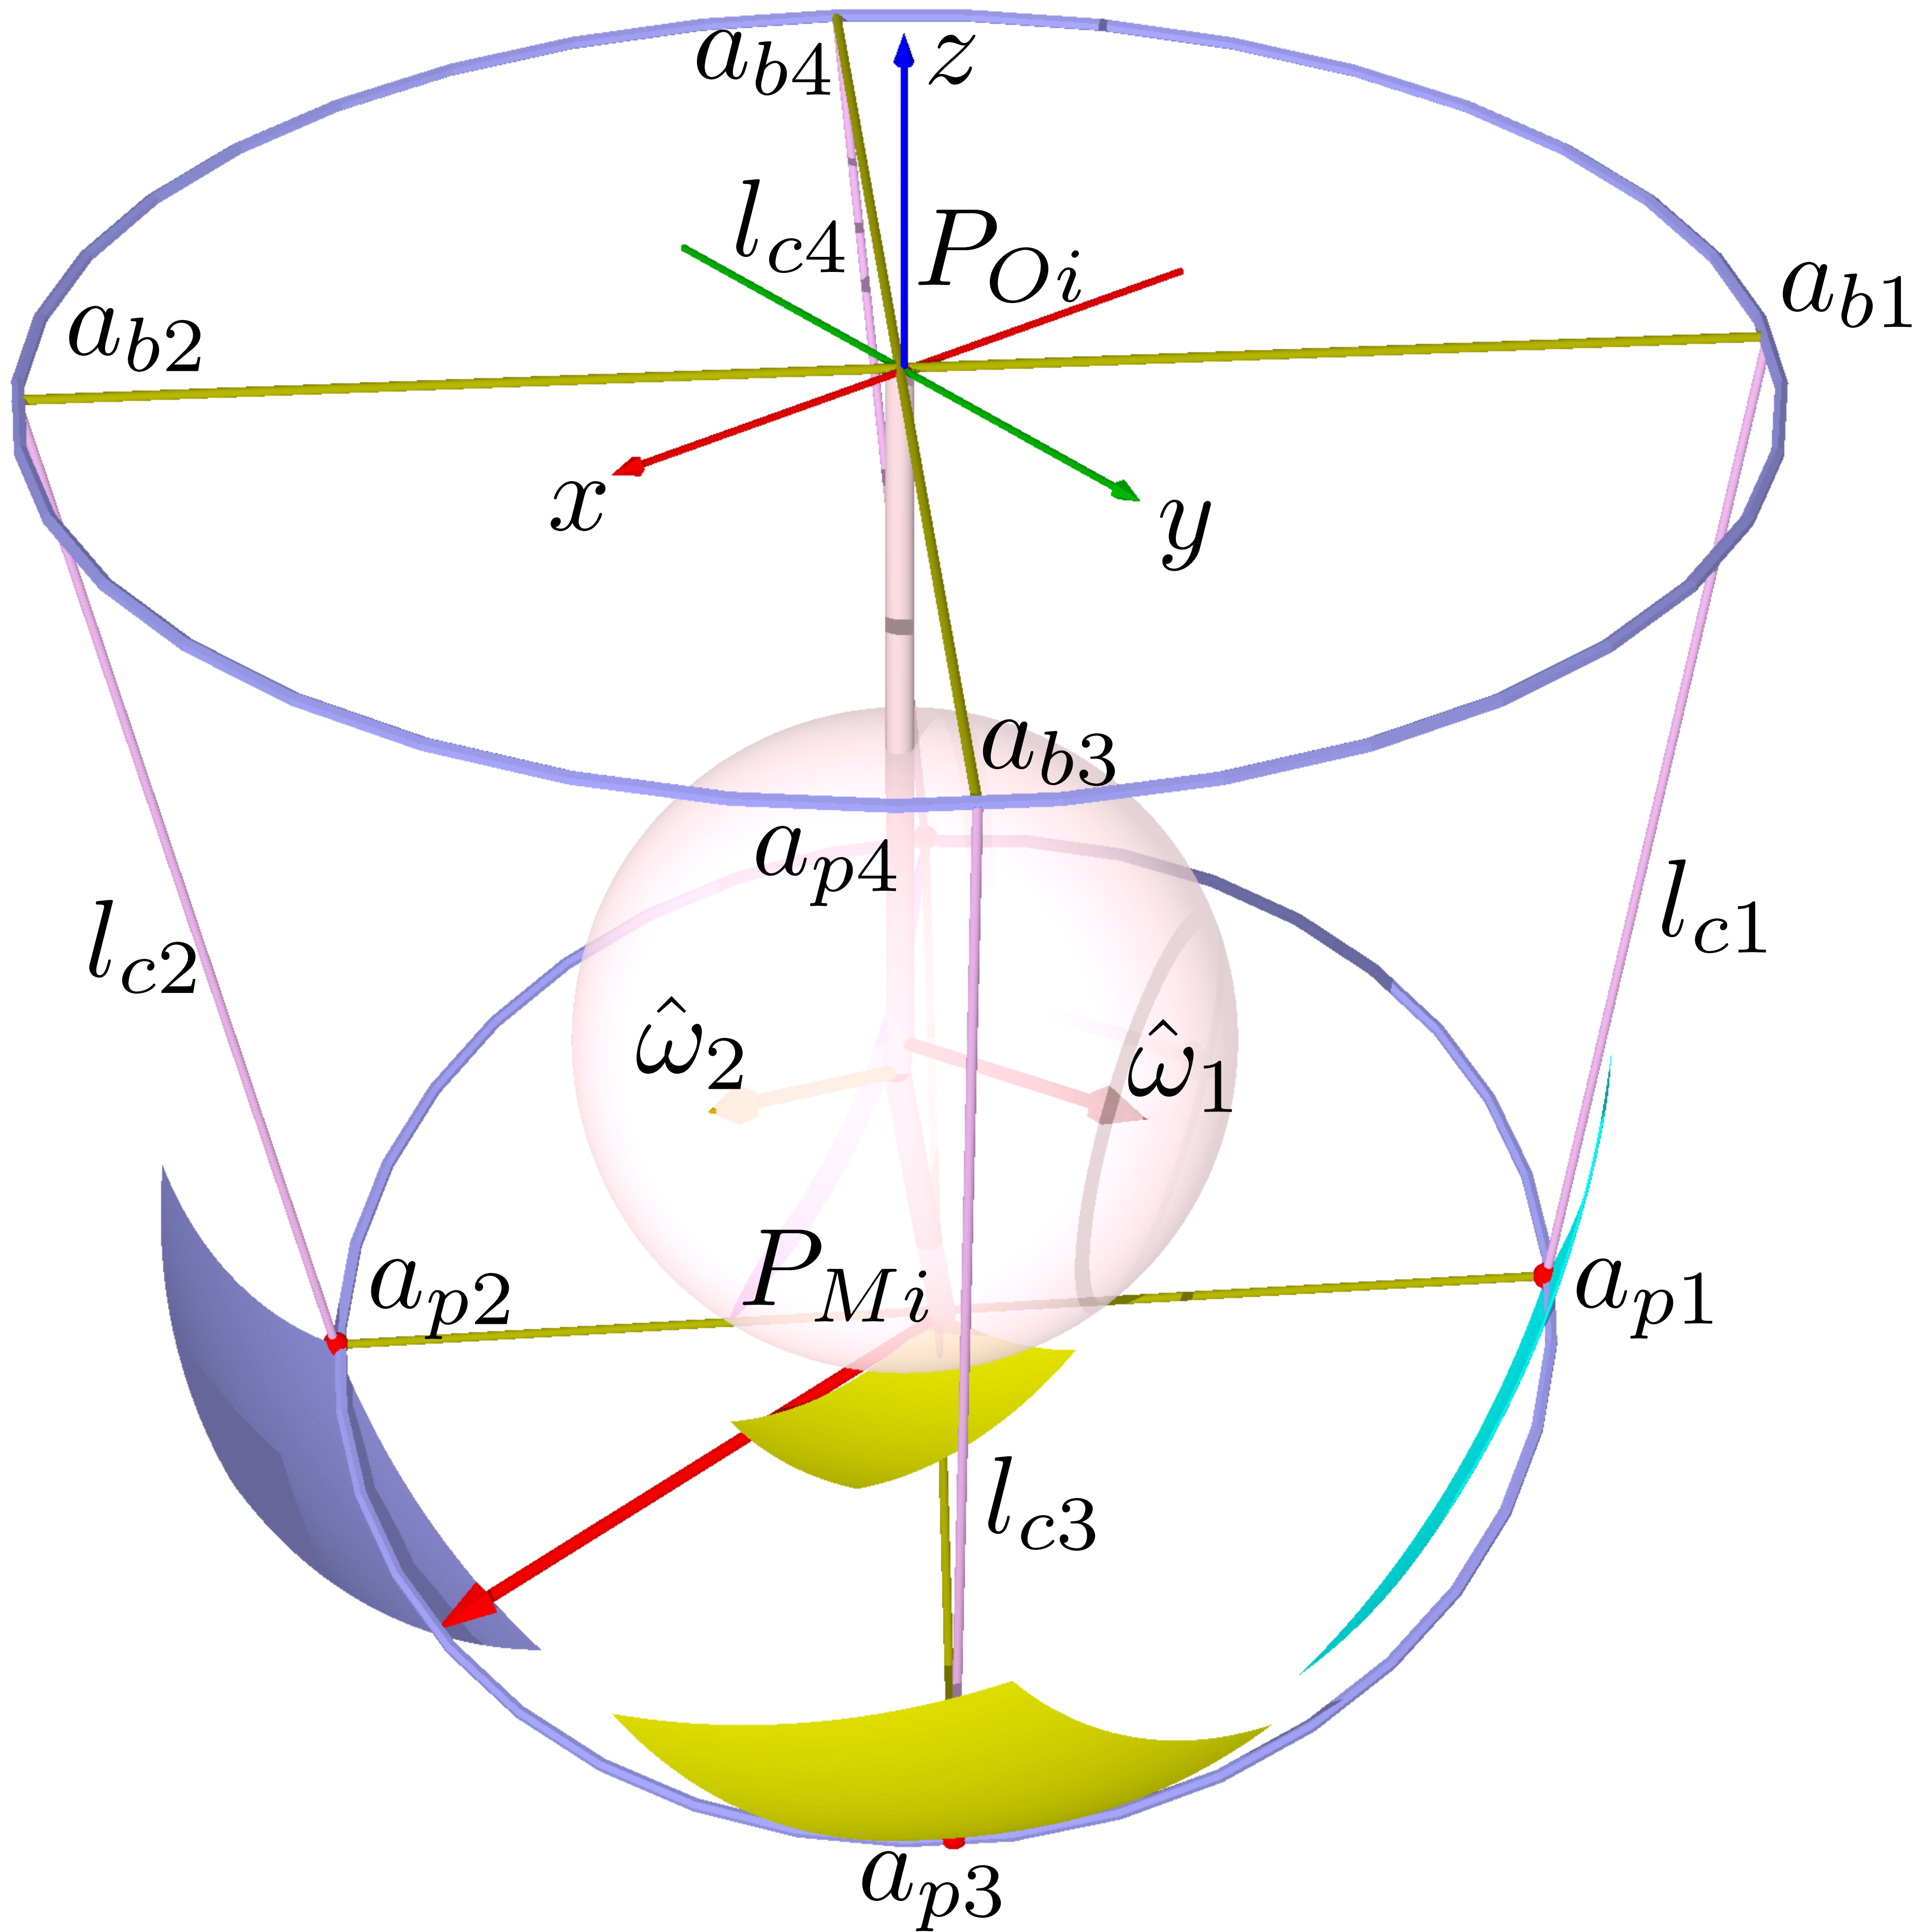

Supplement: s1 [file s1]

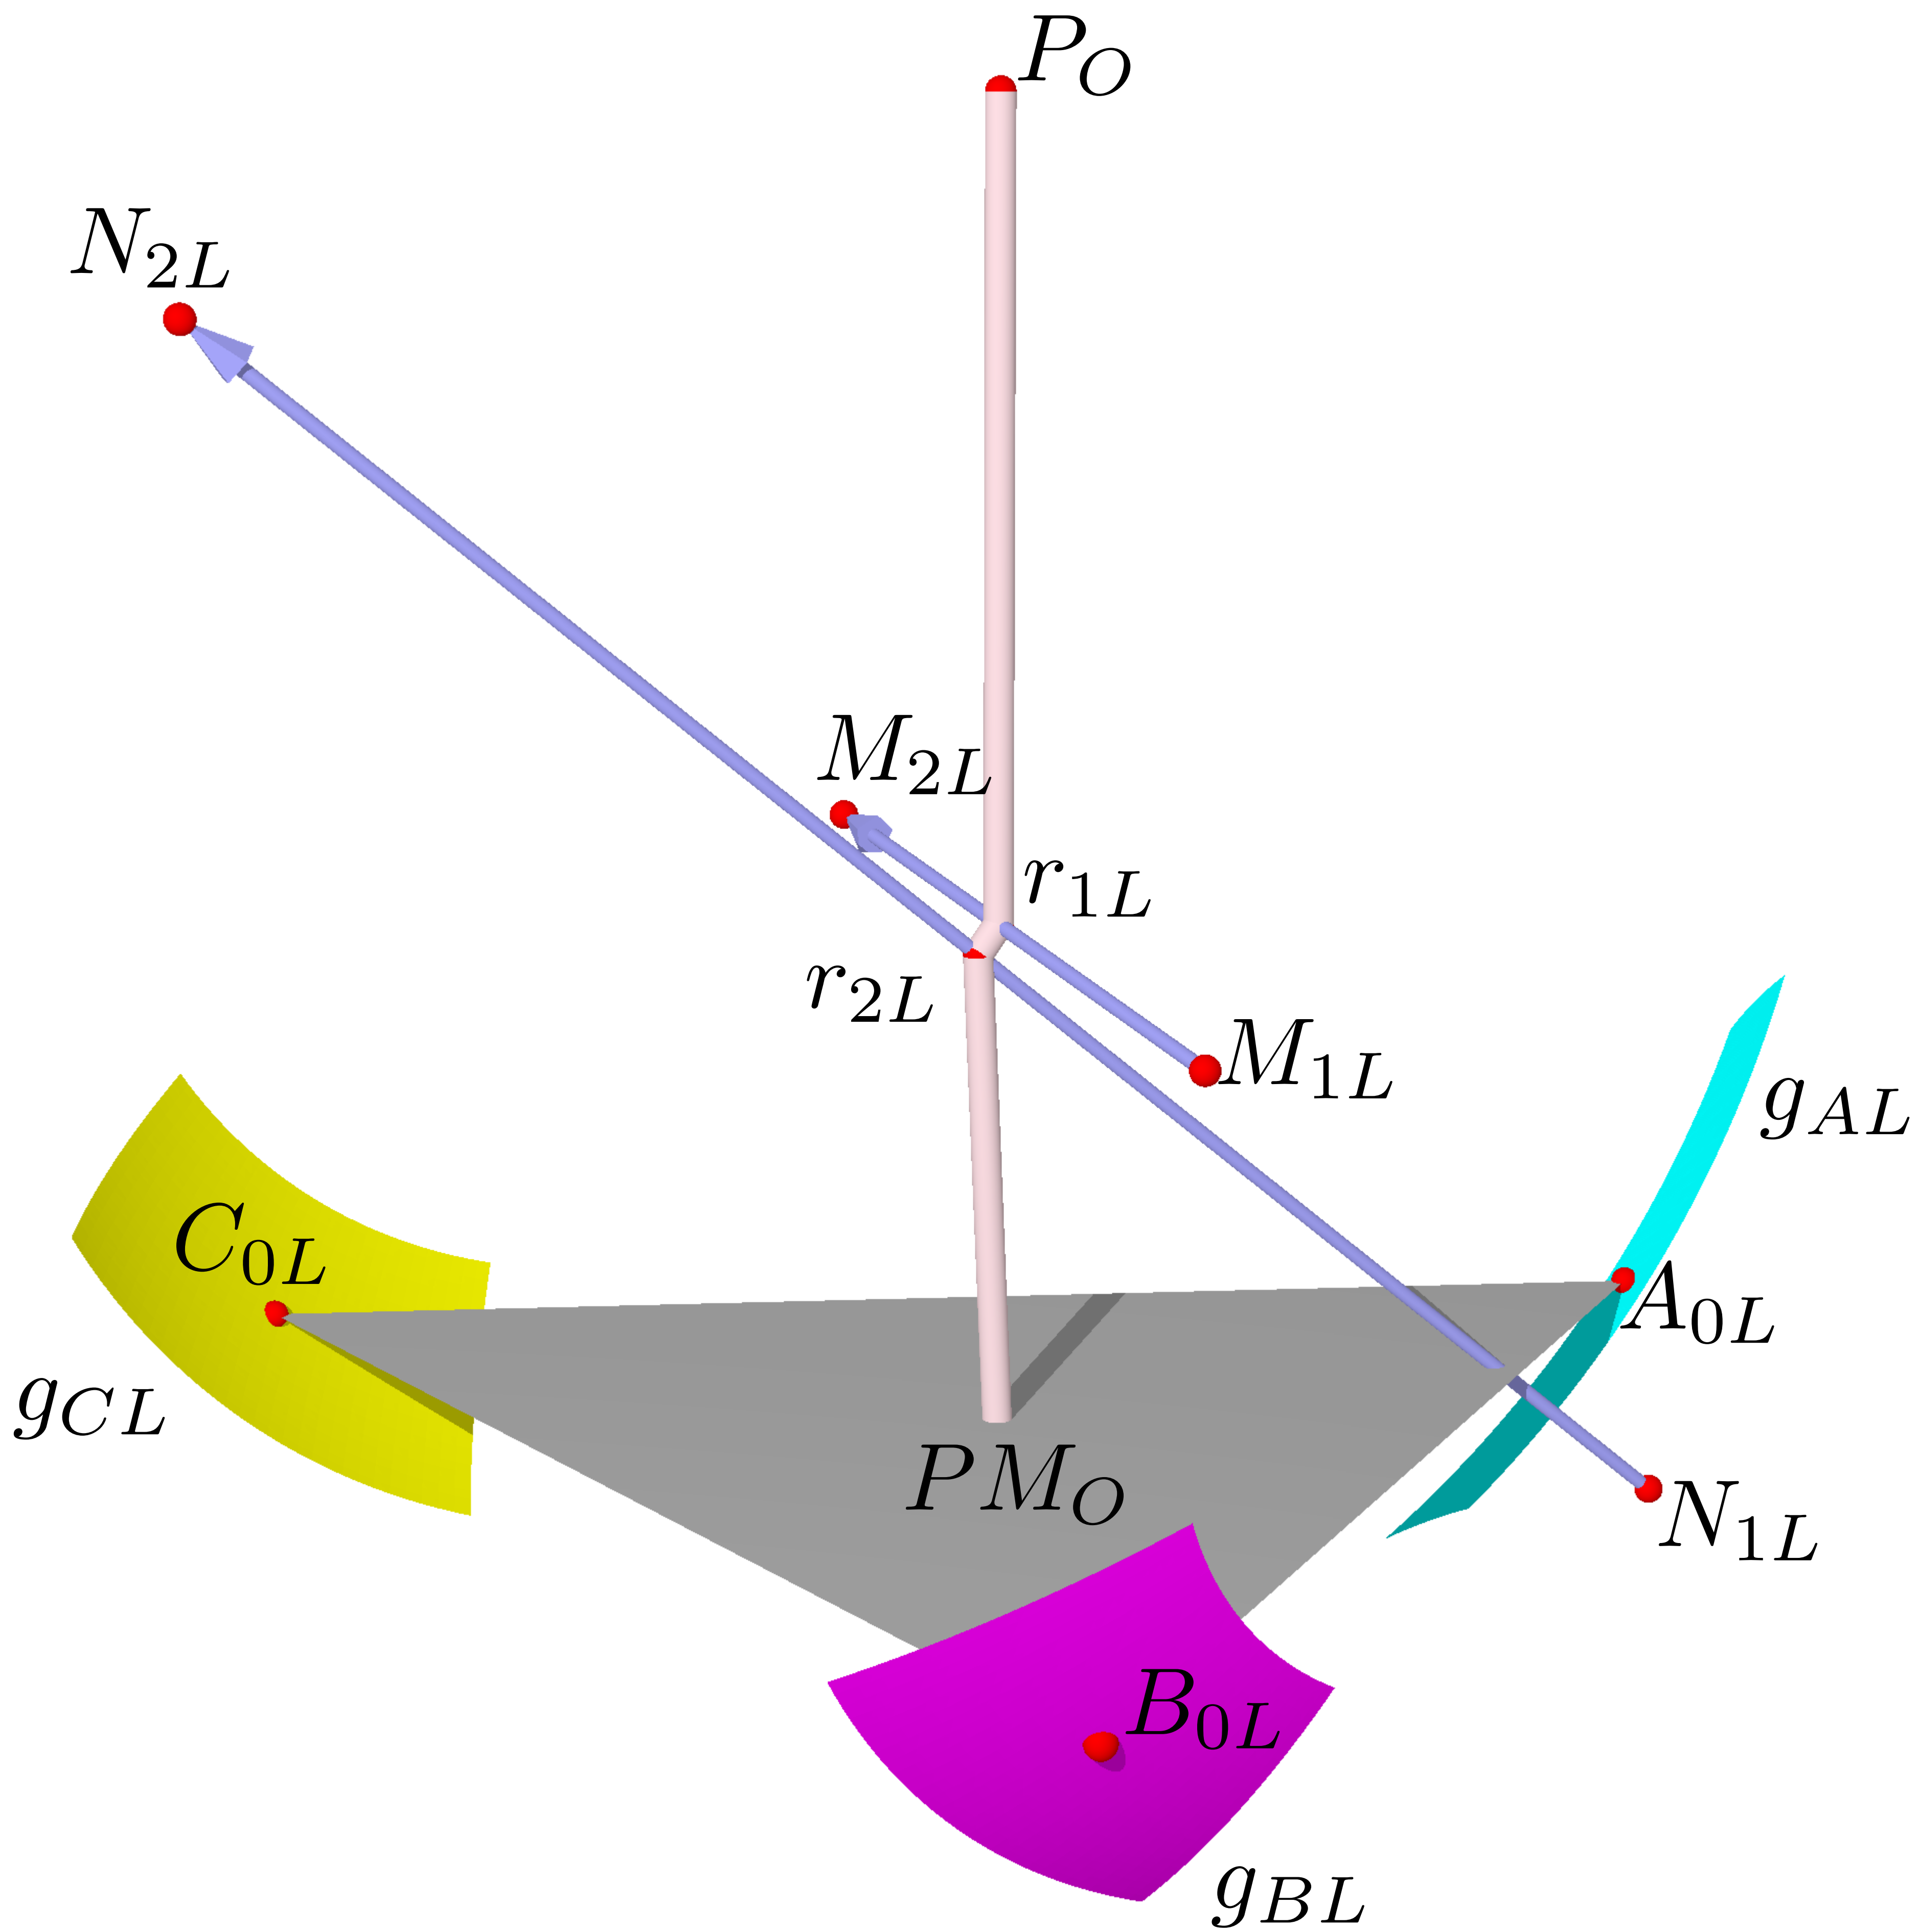

Supplement: s1 [file s1]

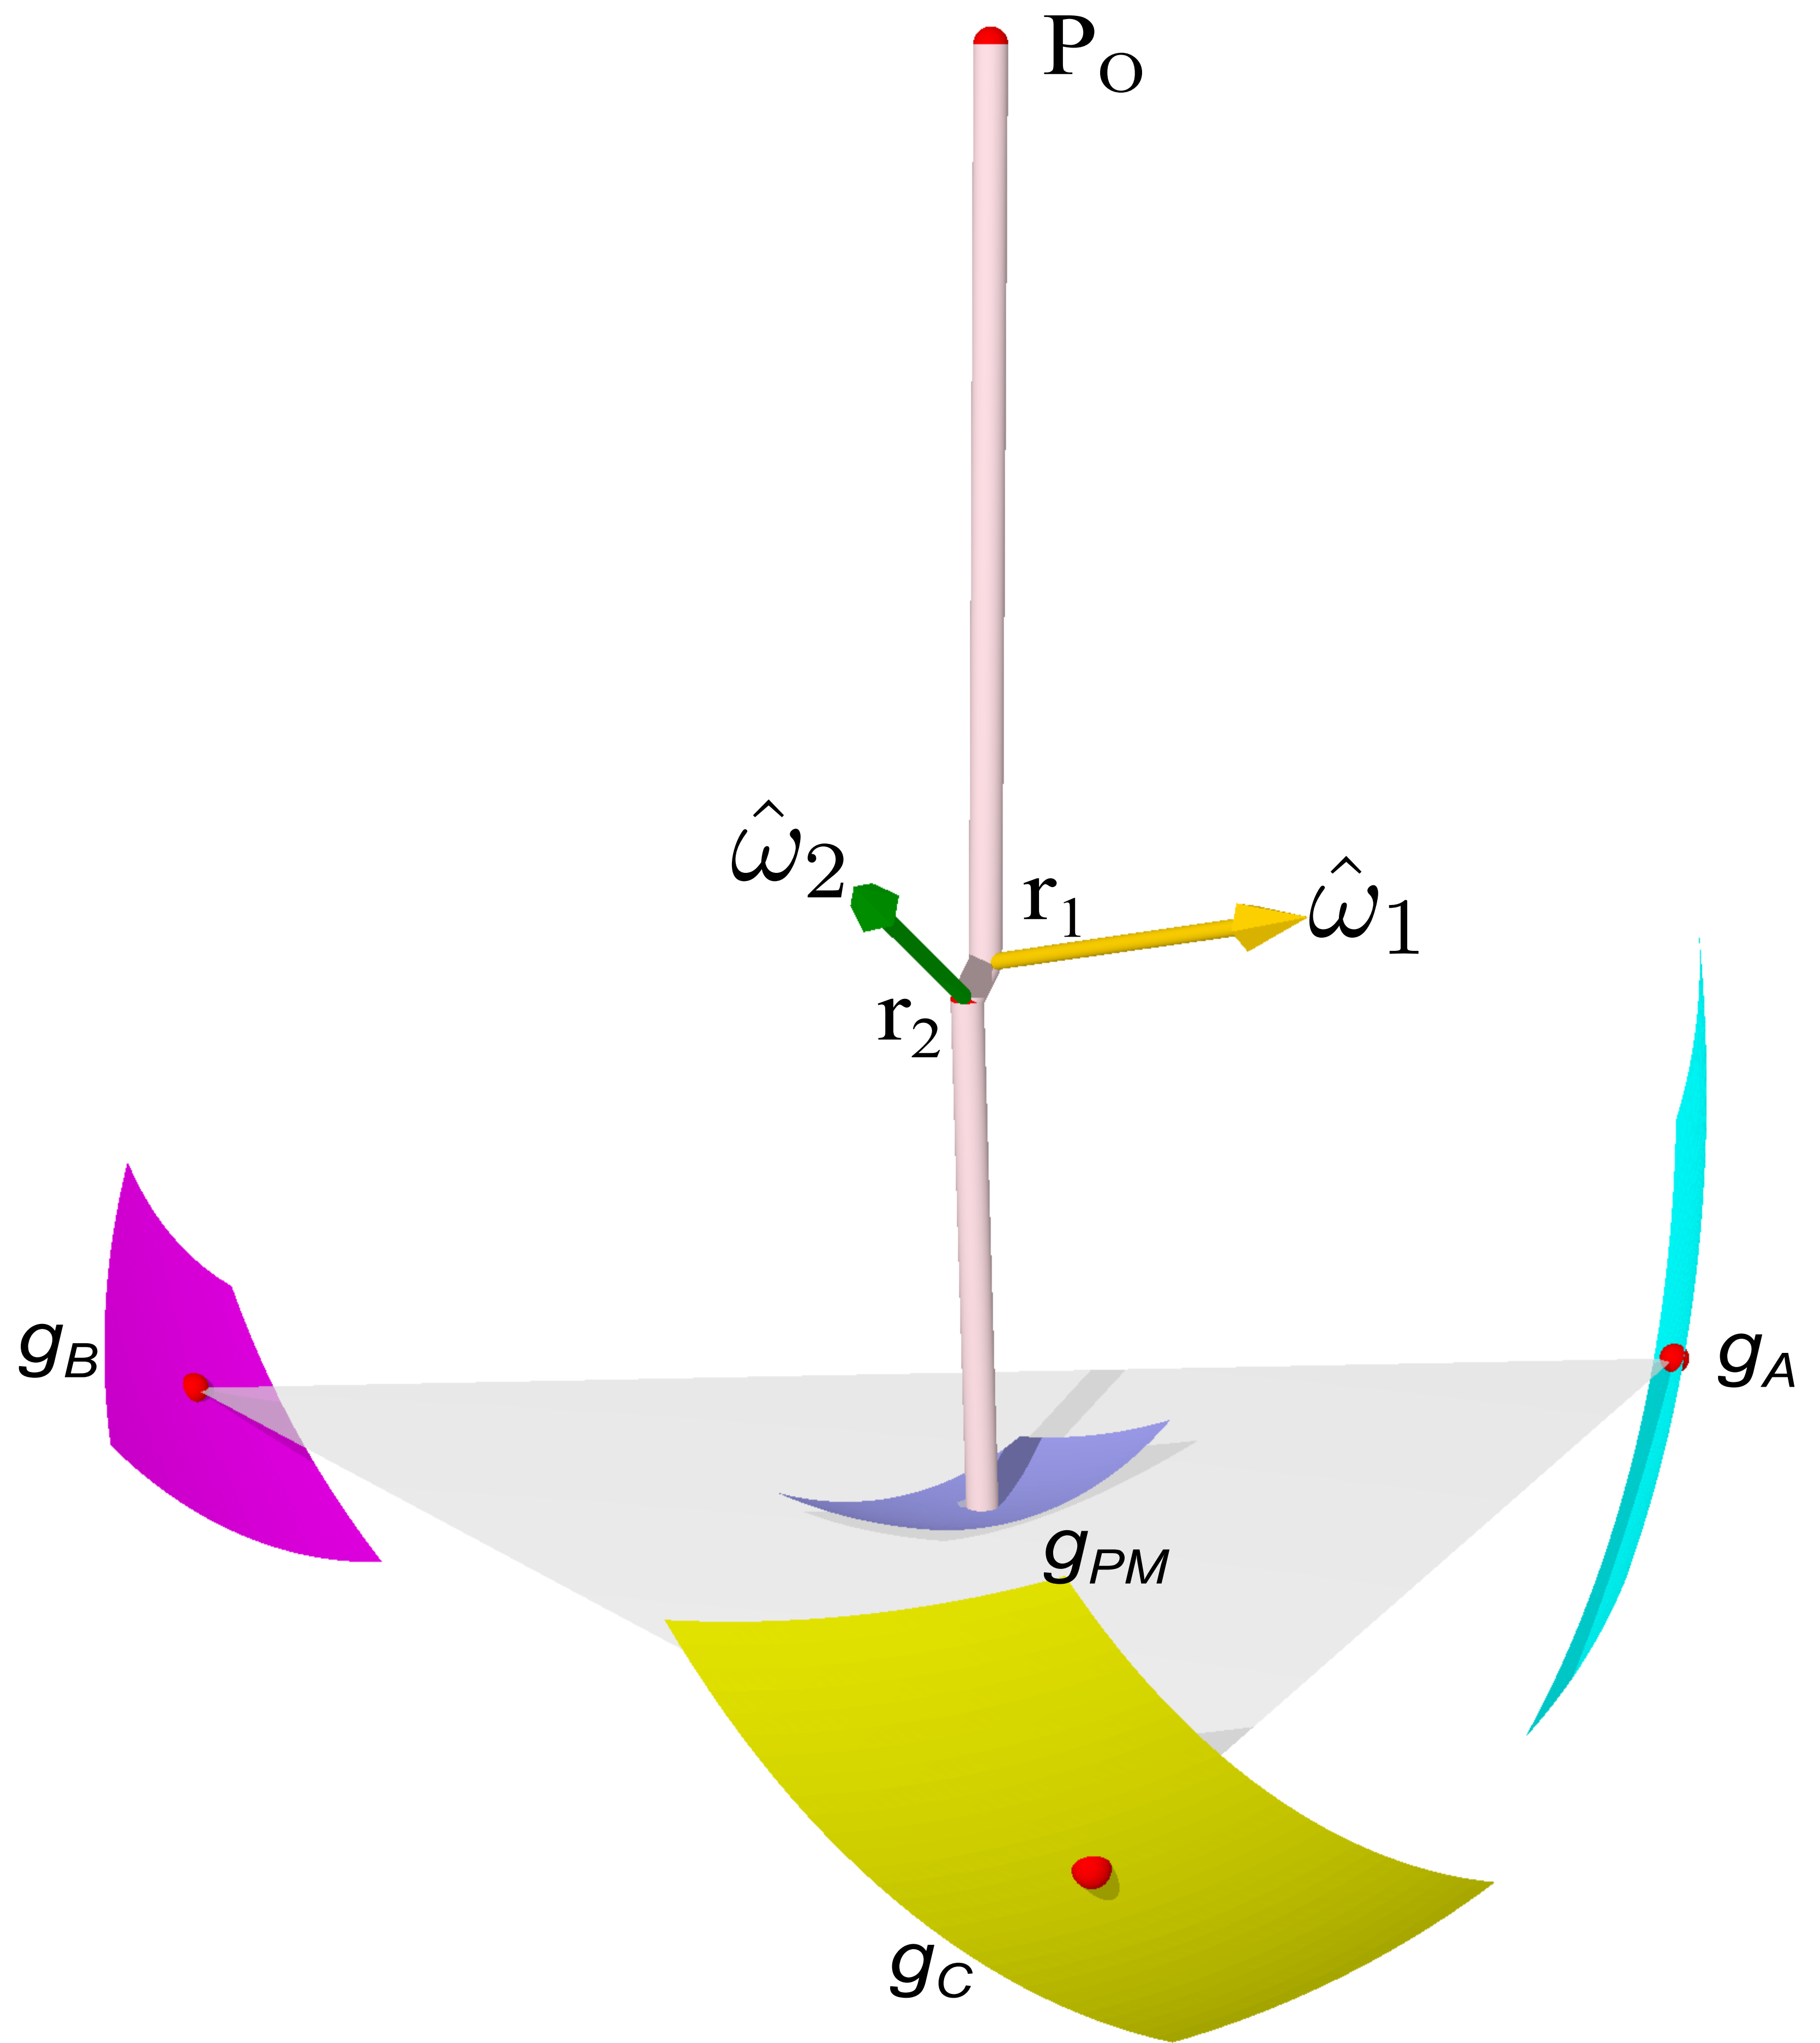

Supplement: s1 [file s1]

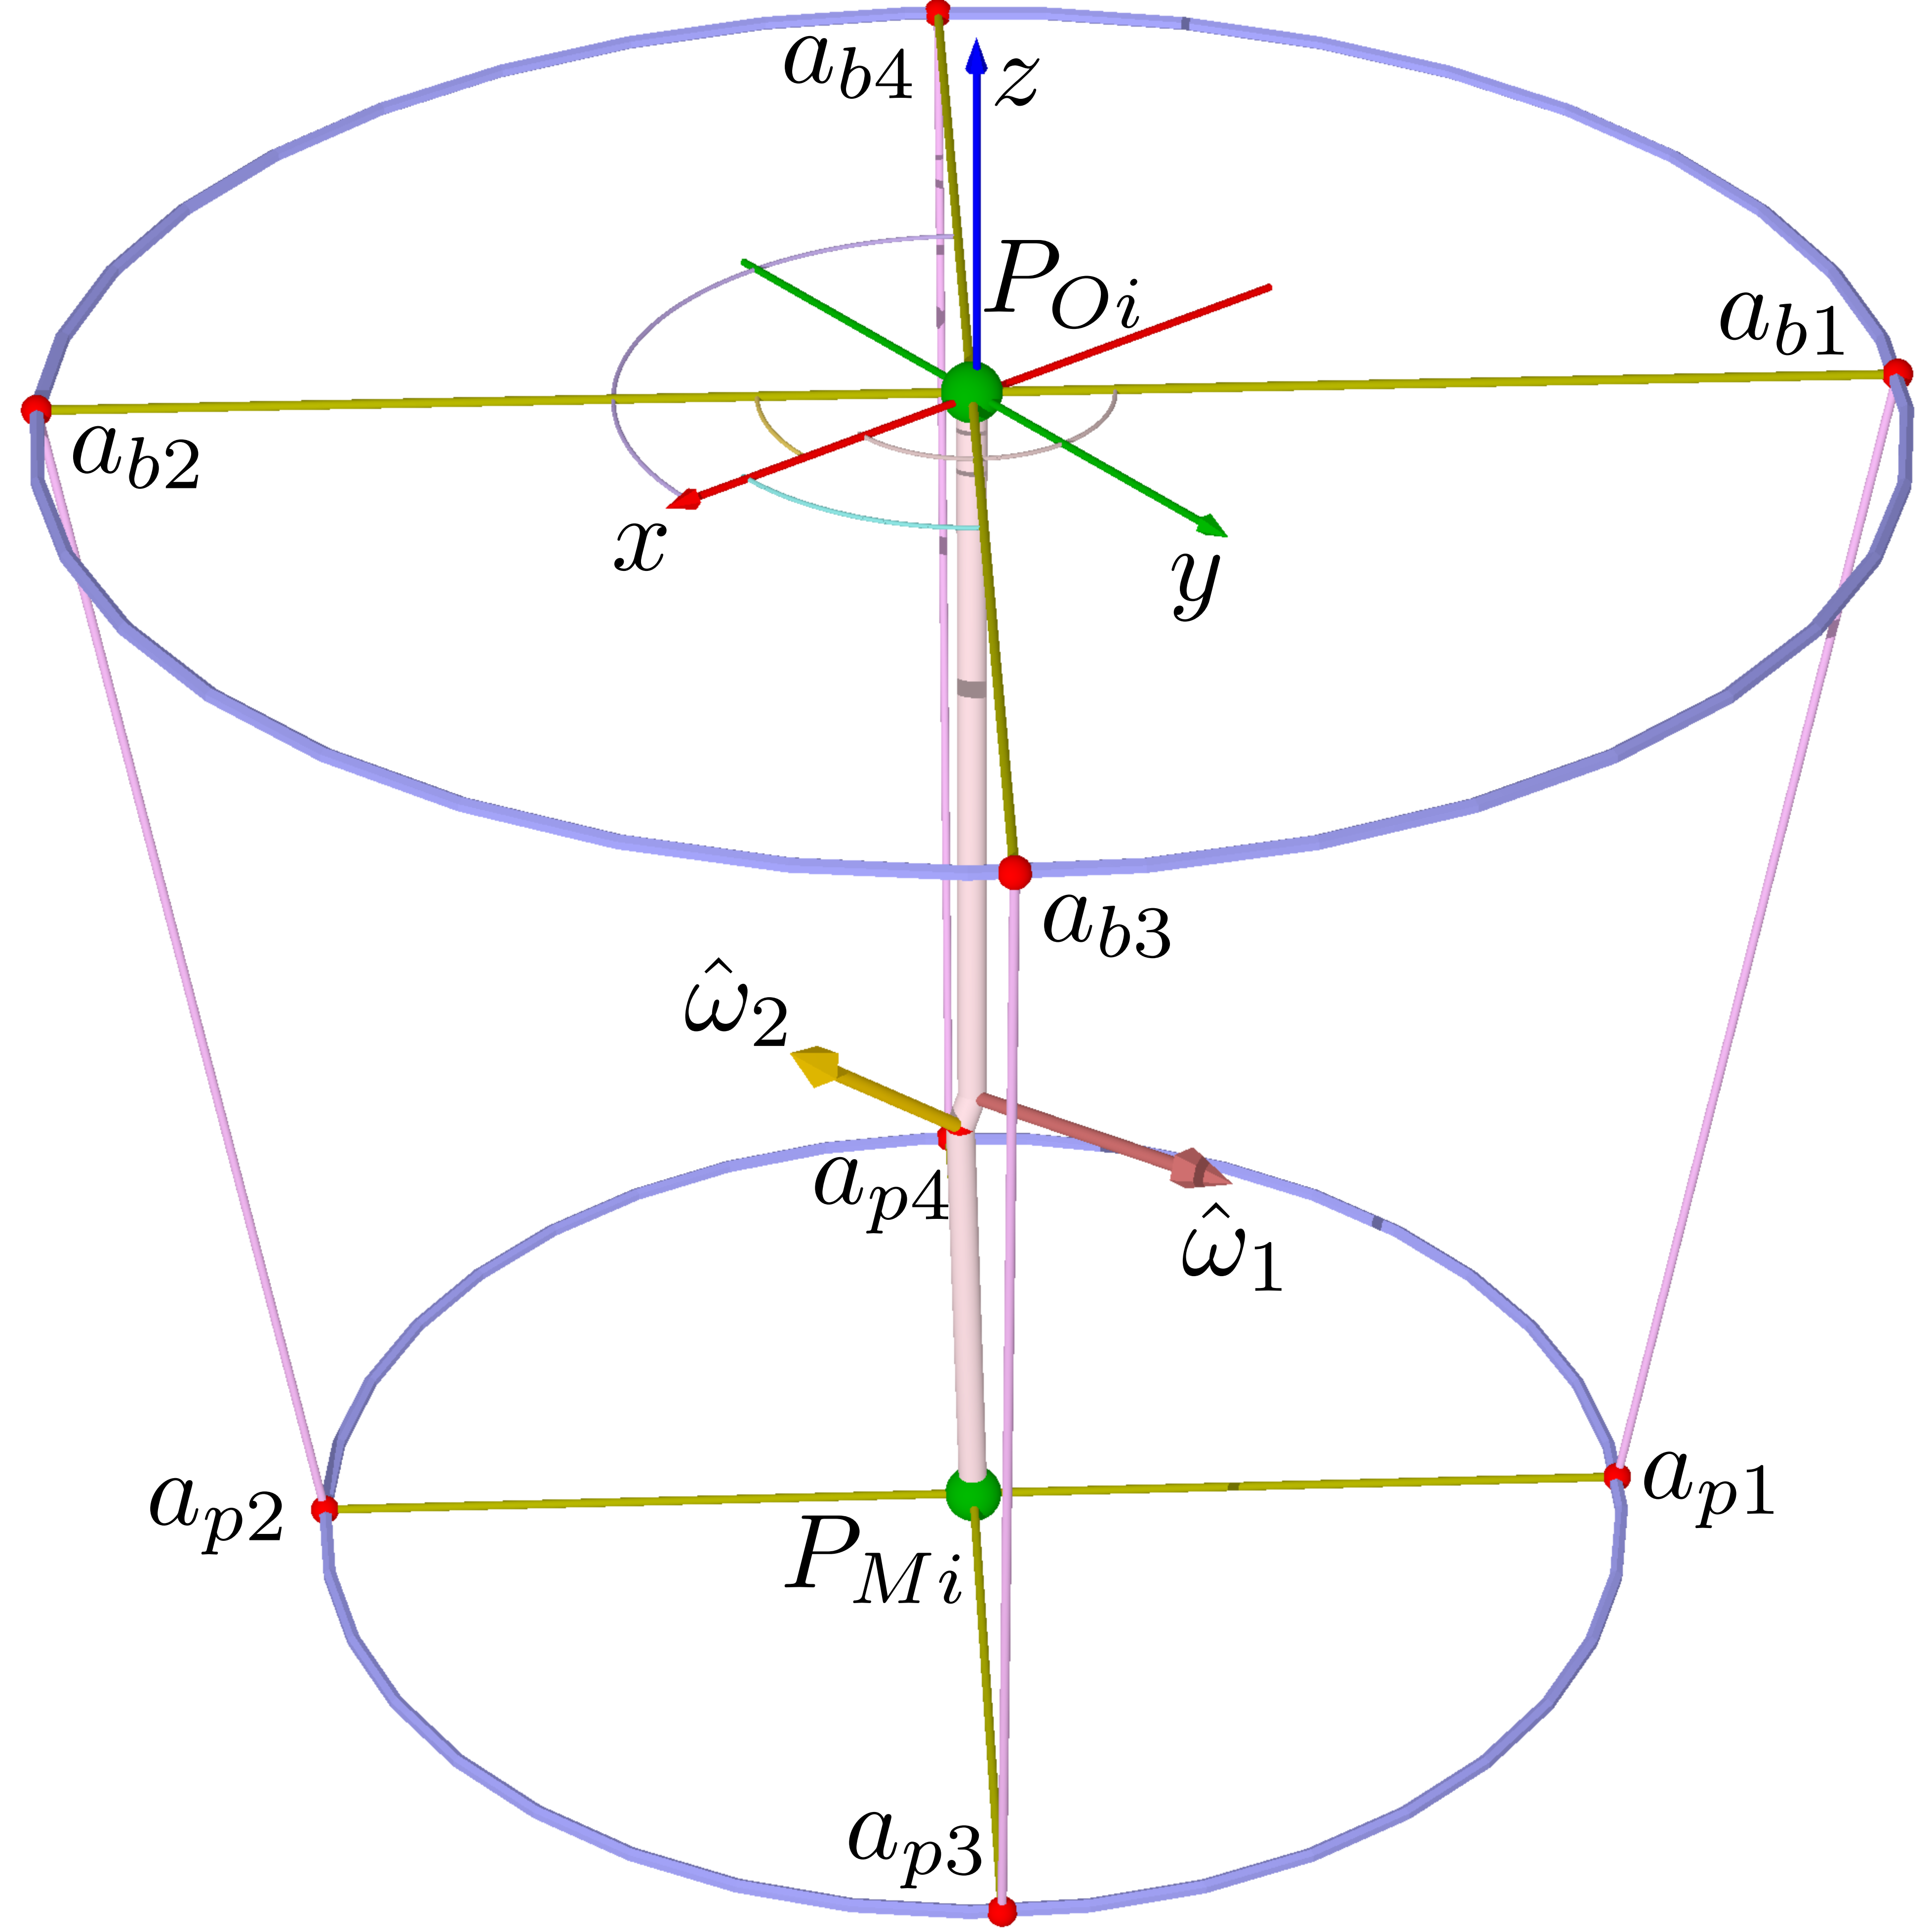

Supplement: s1 [file s1]

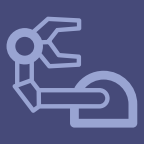

*robotics*

Supplement: s1 [file s1]

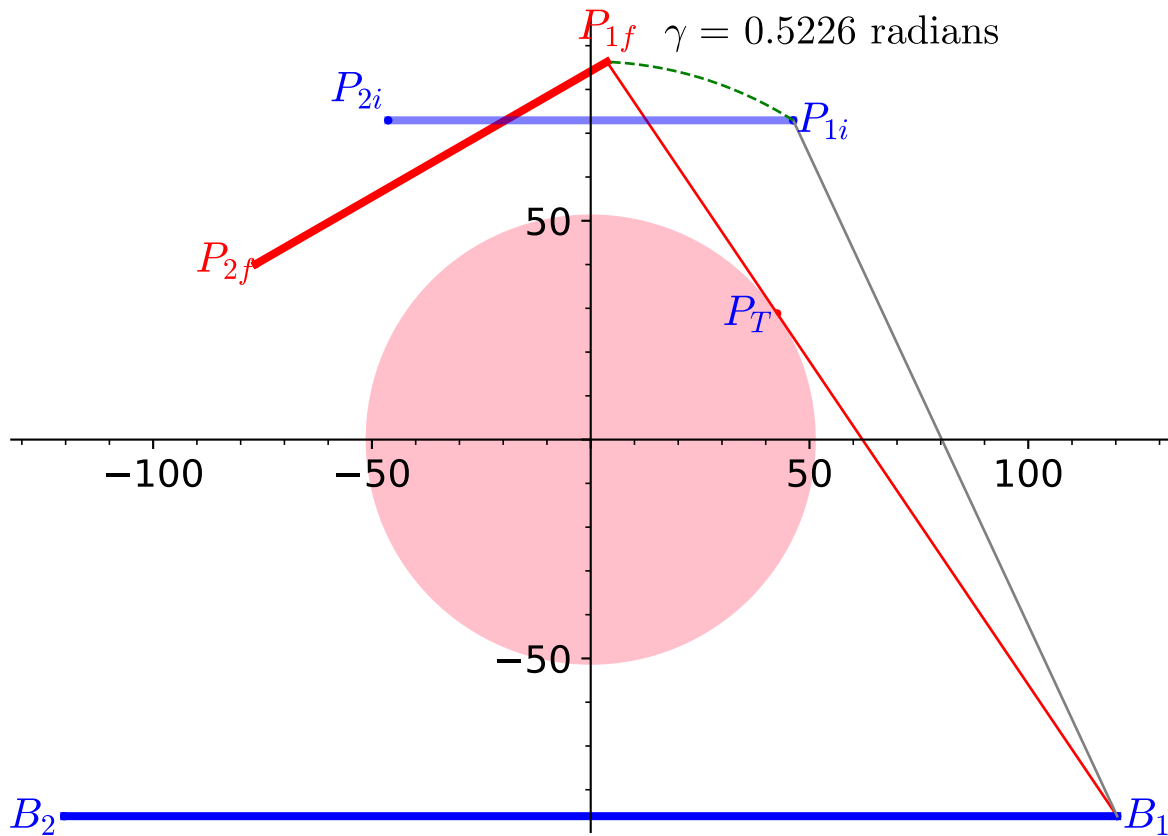

Supplement: s1 [file s1]

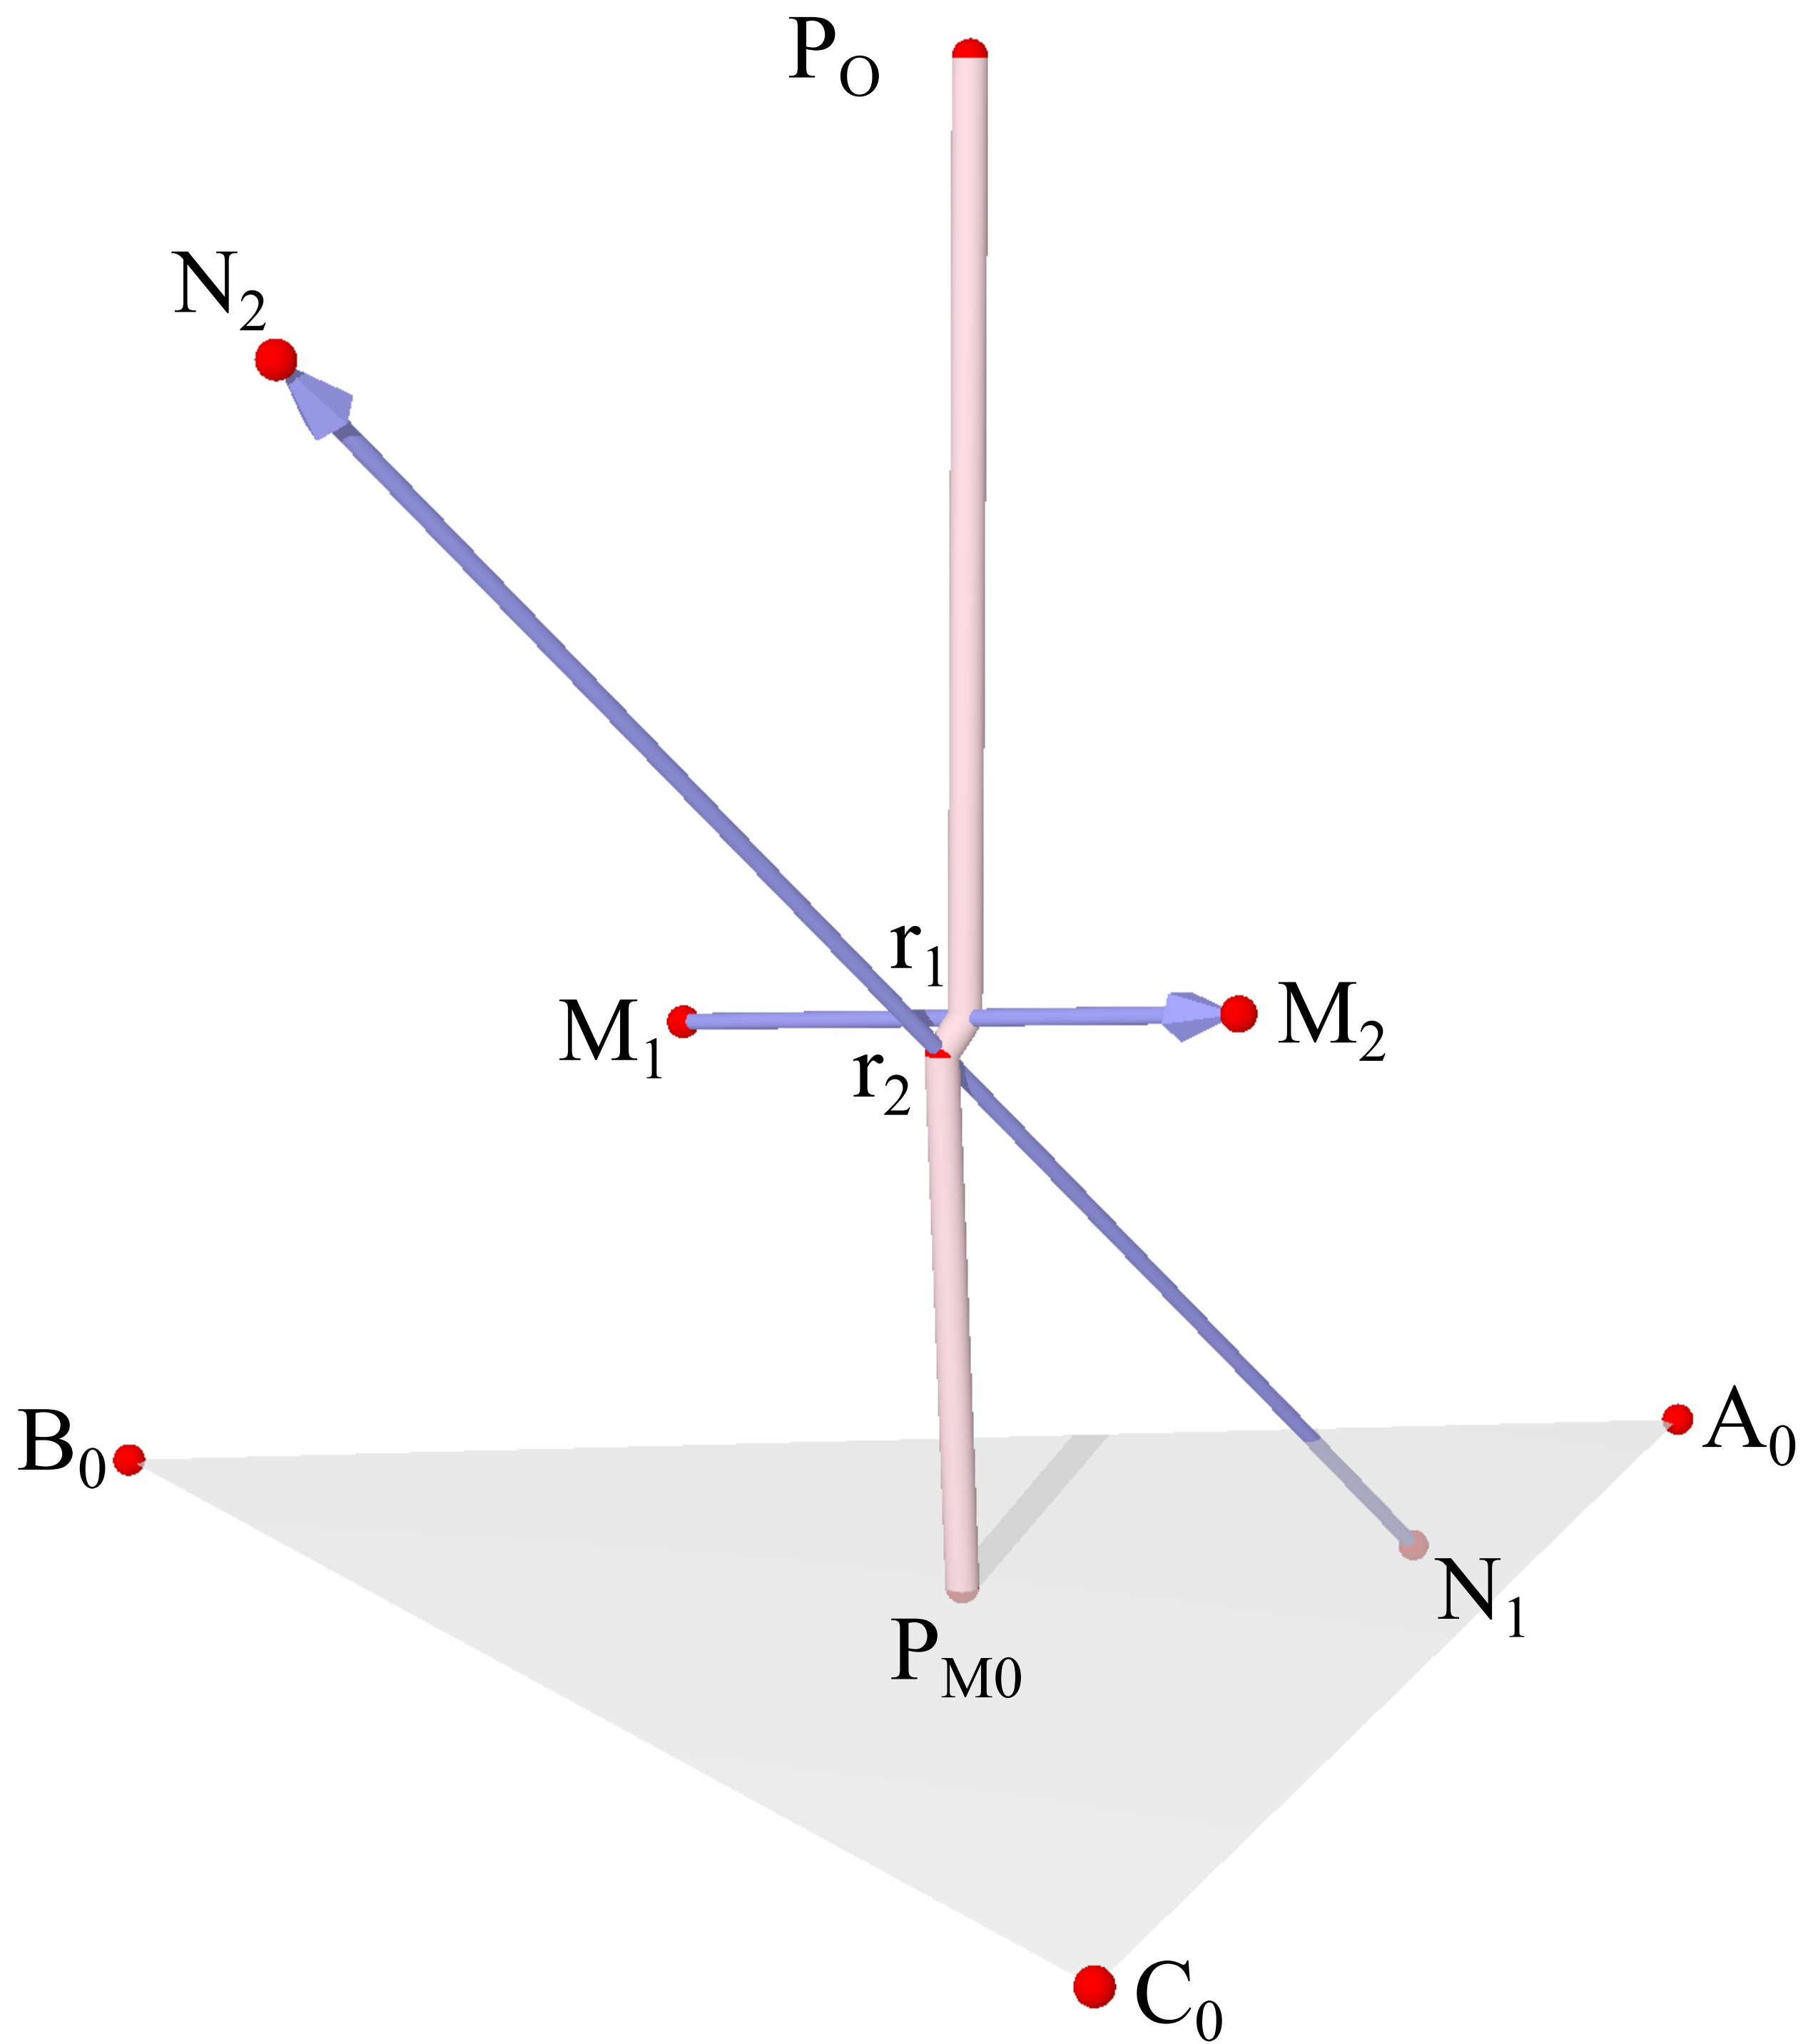

Supplement: s1 [file s1]

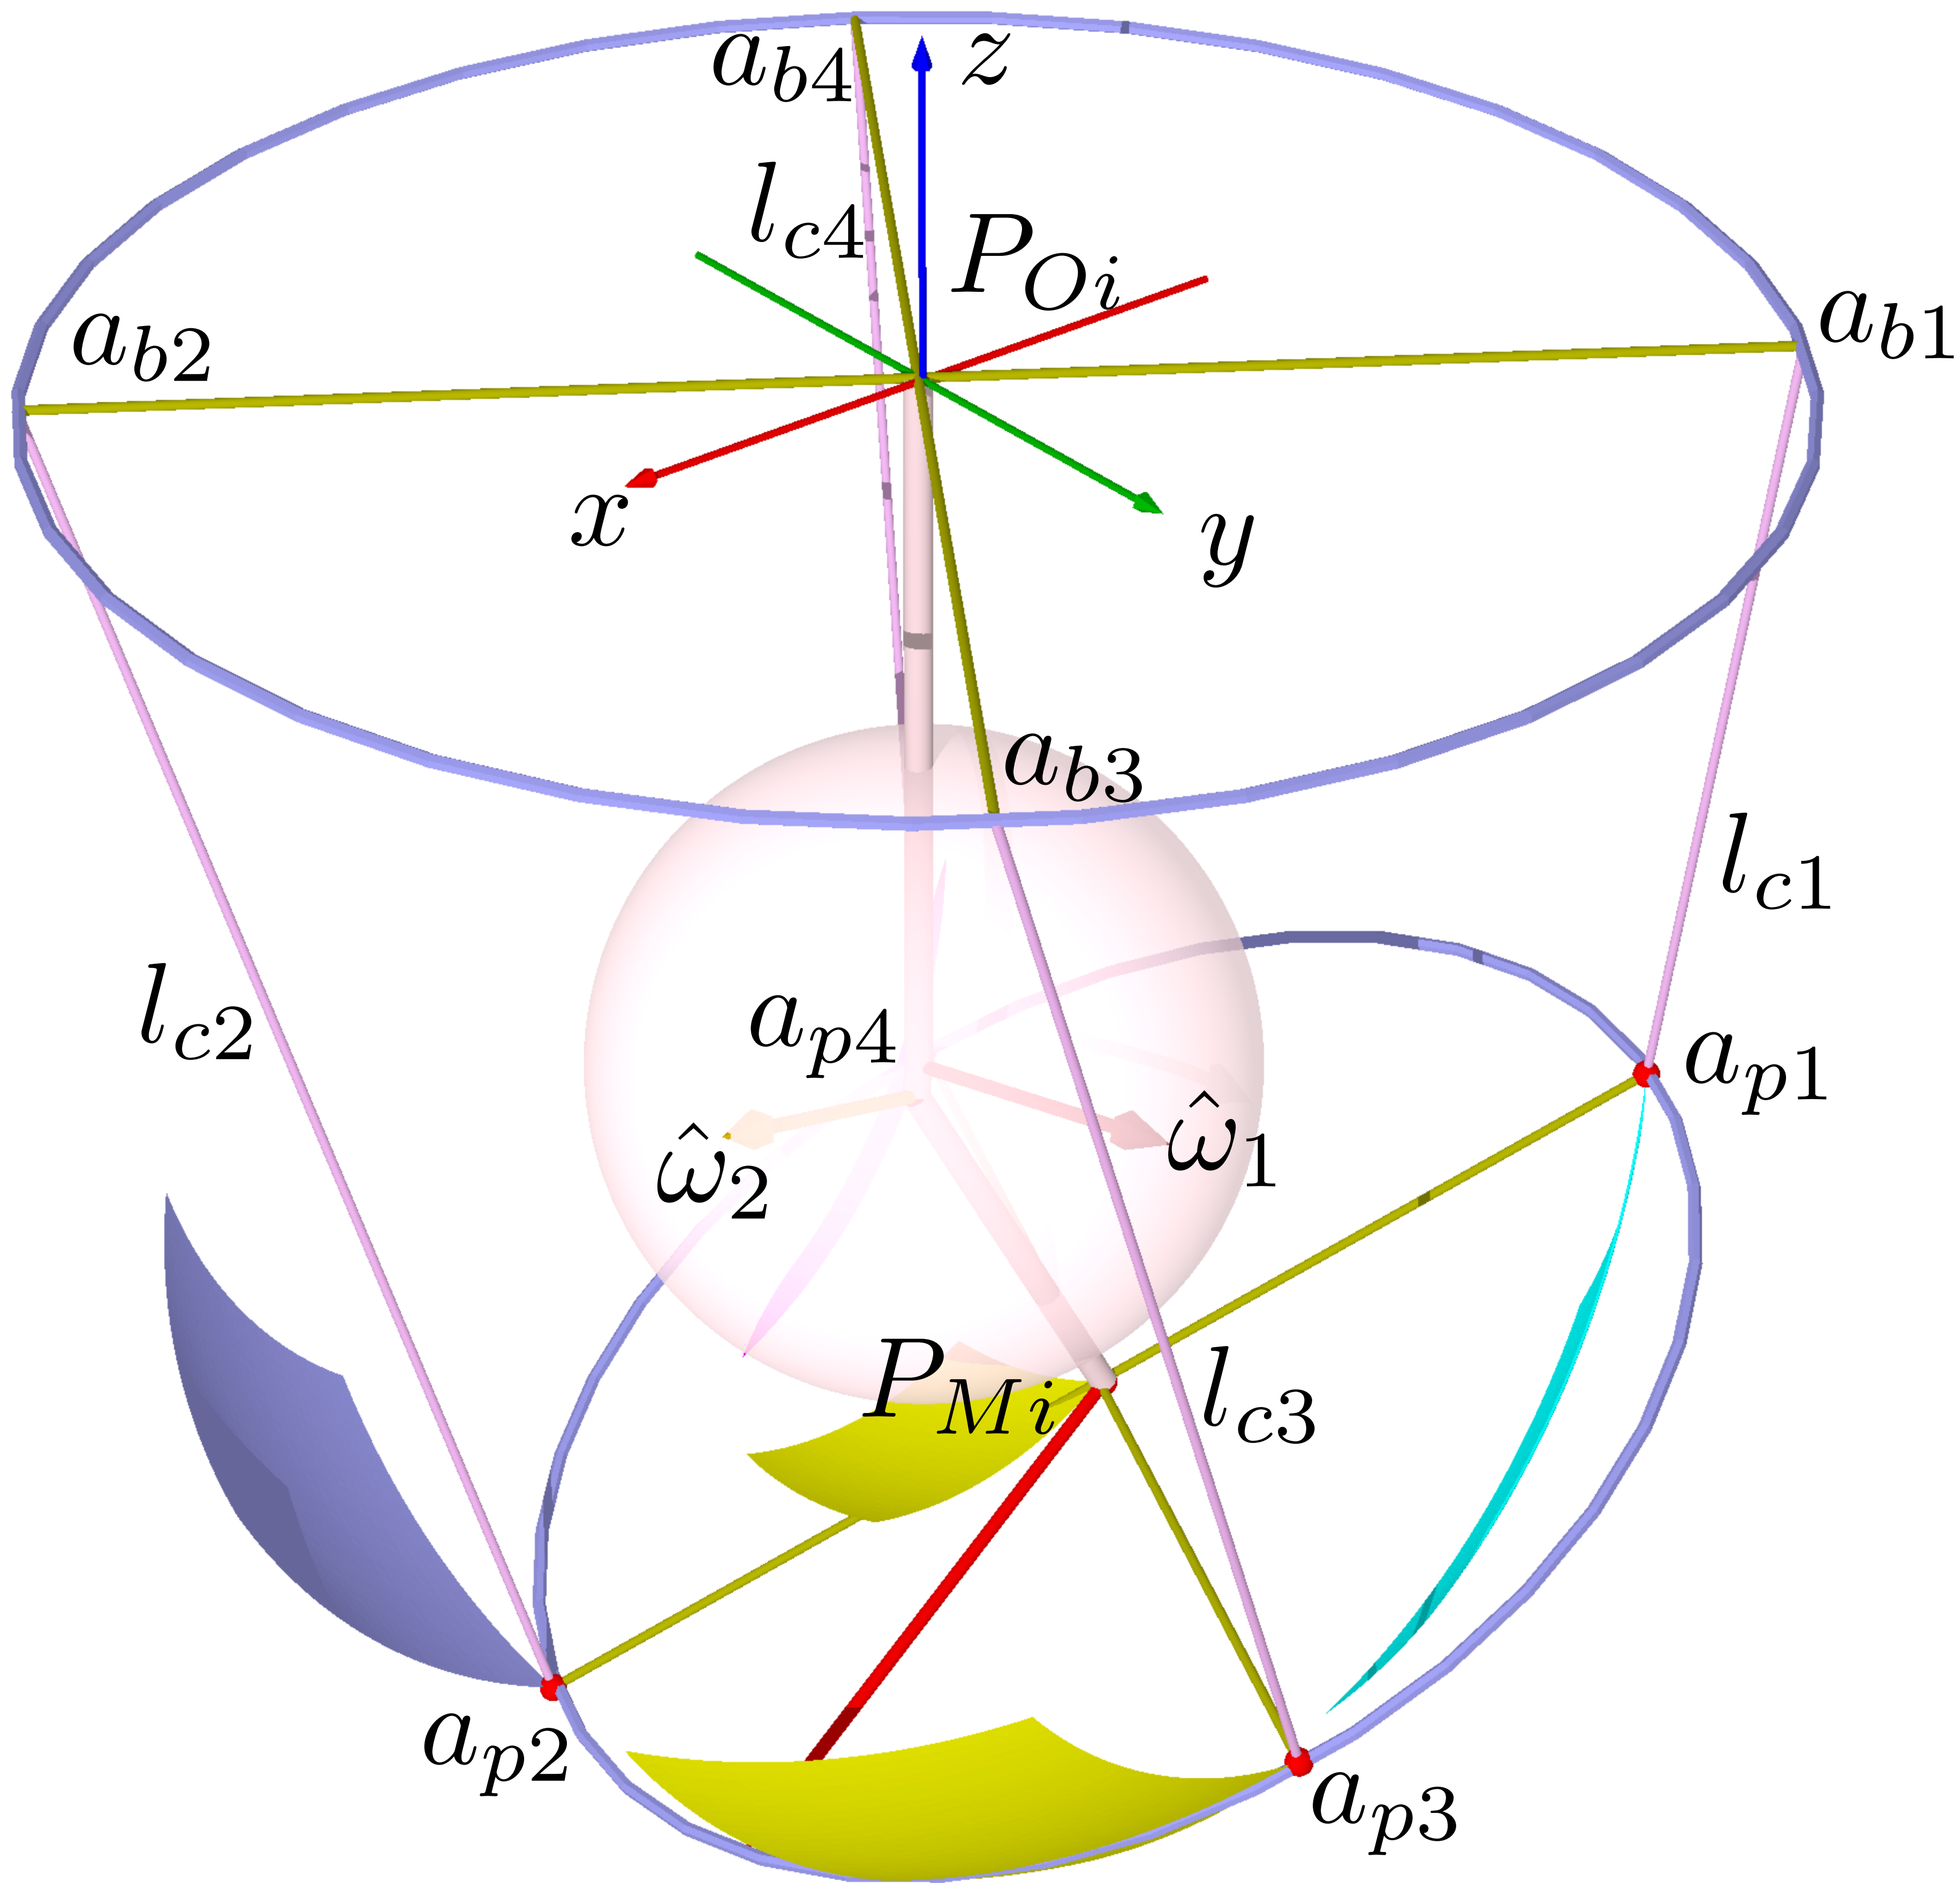

Supplement: s1 [file s1]

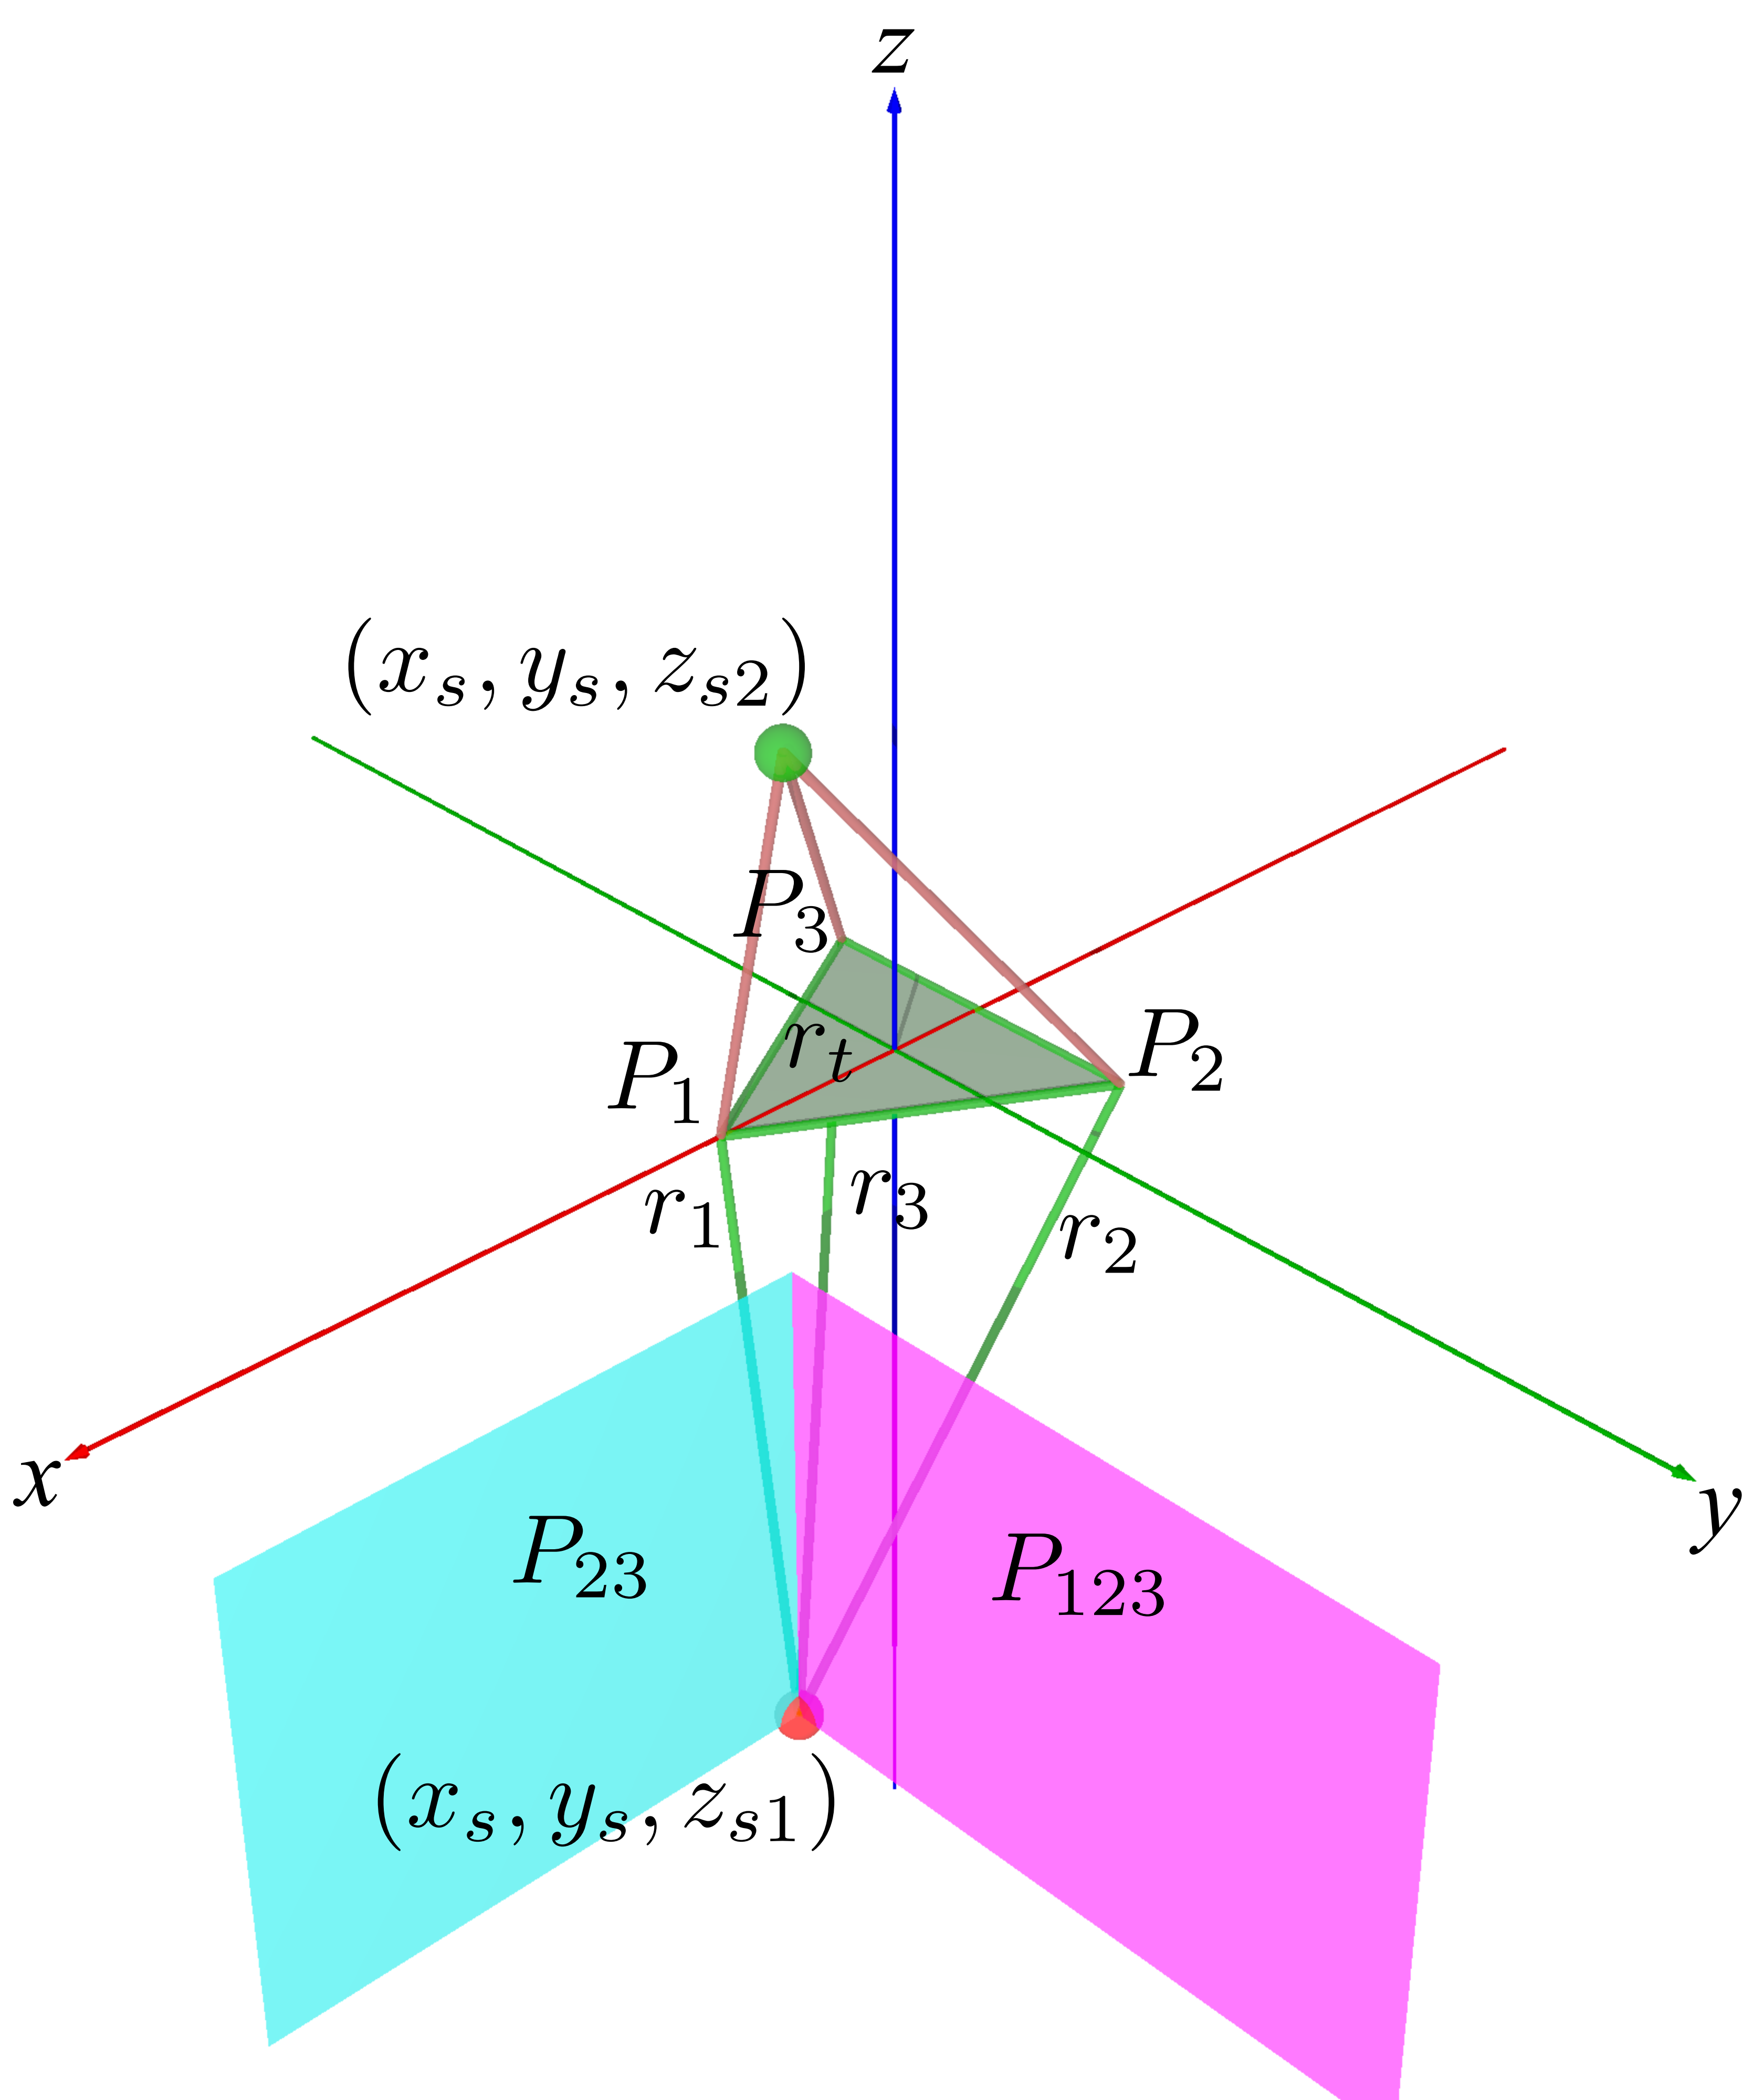

Supplement: s1 [file s1]

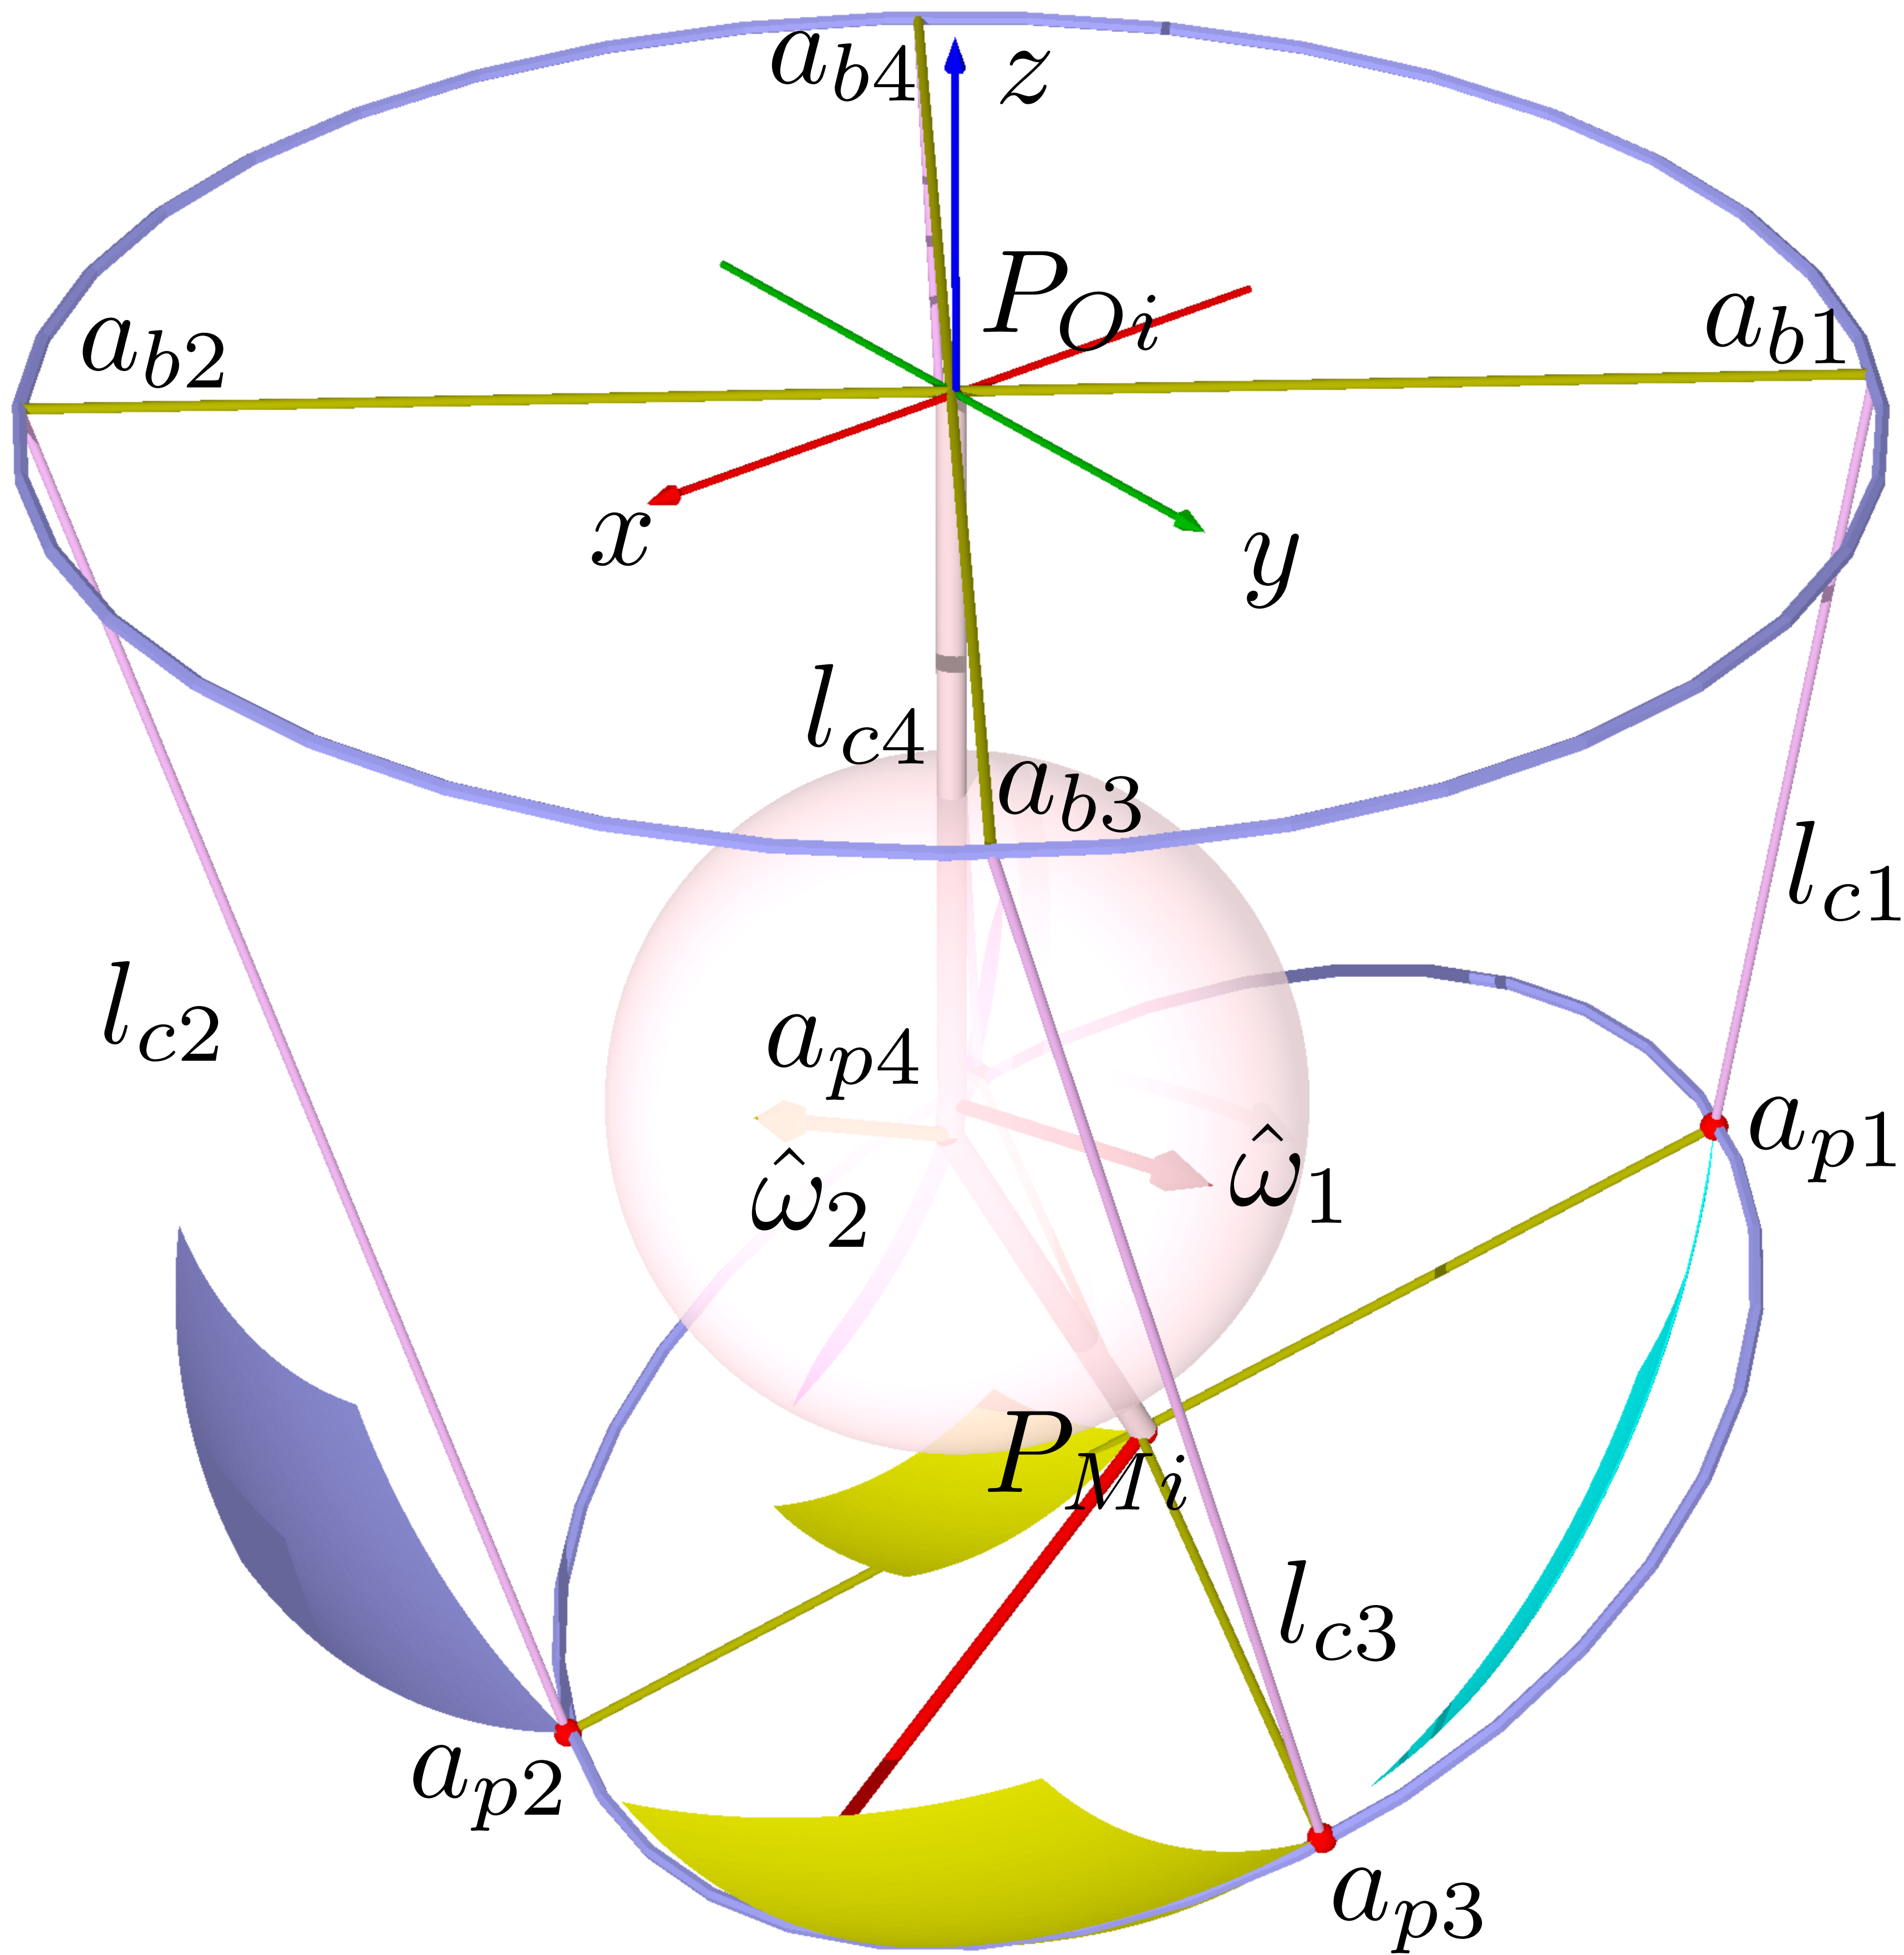

Supplement: s1 [file s1]

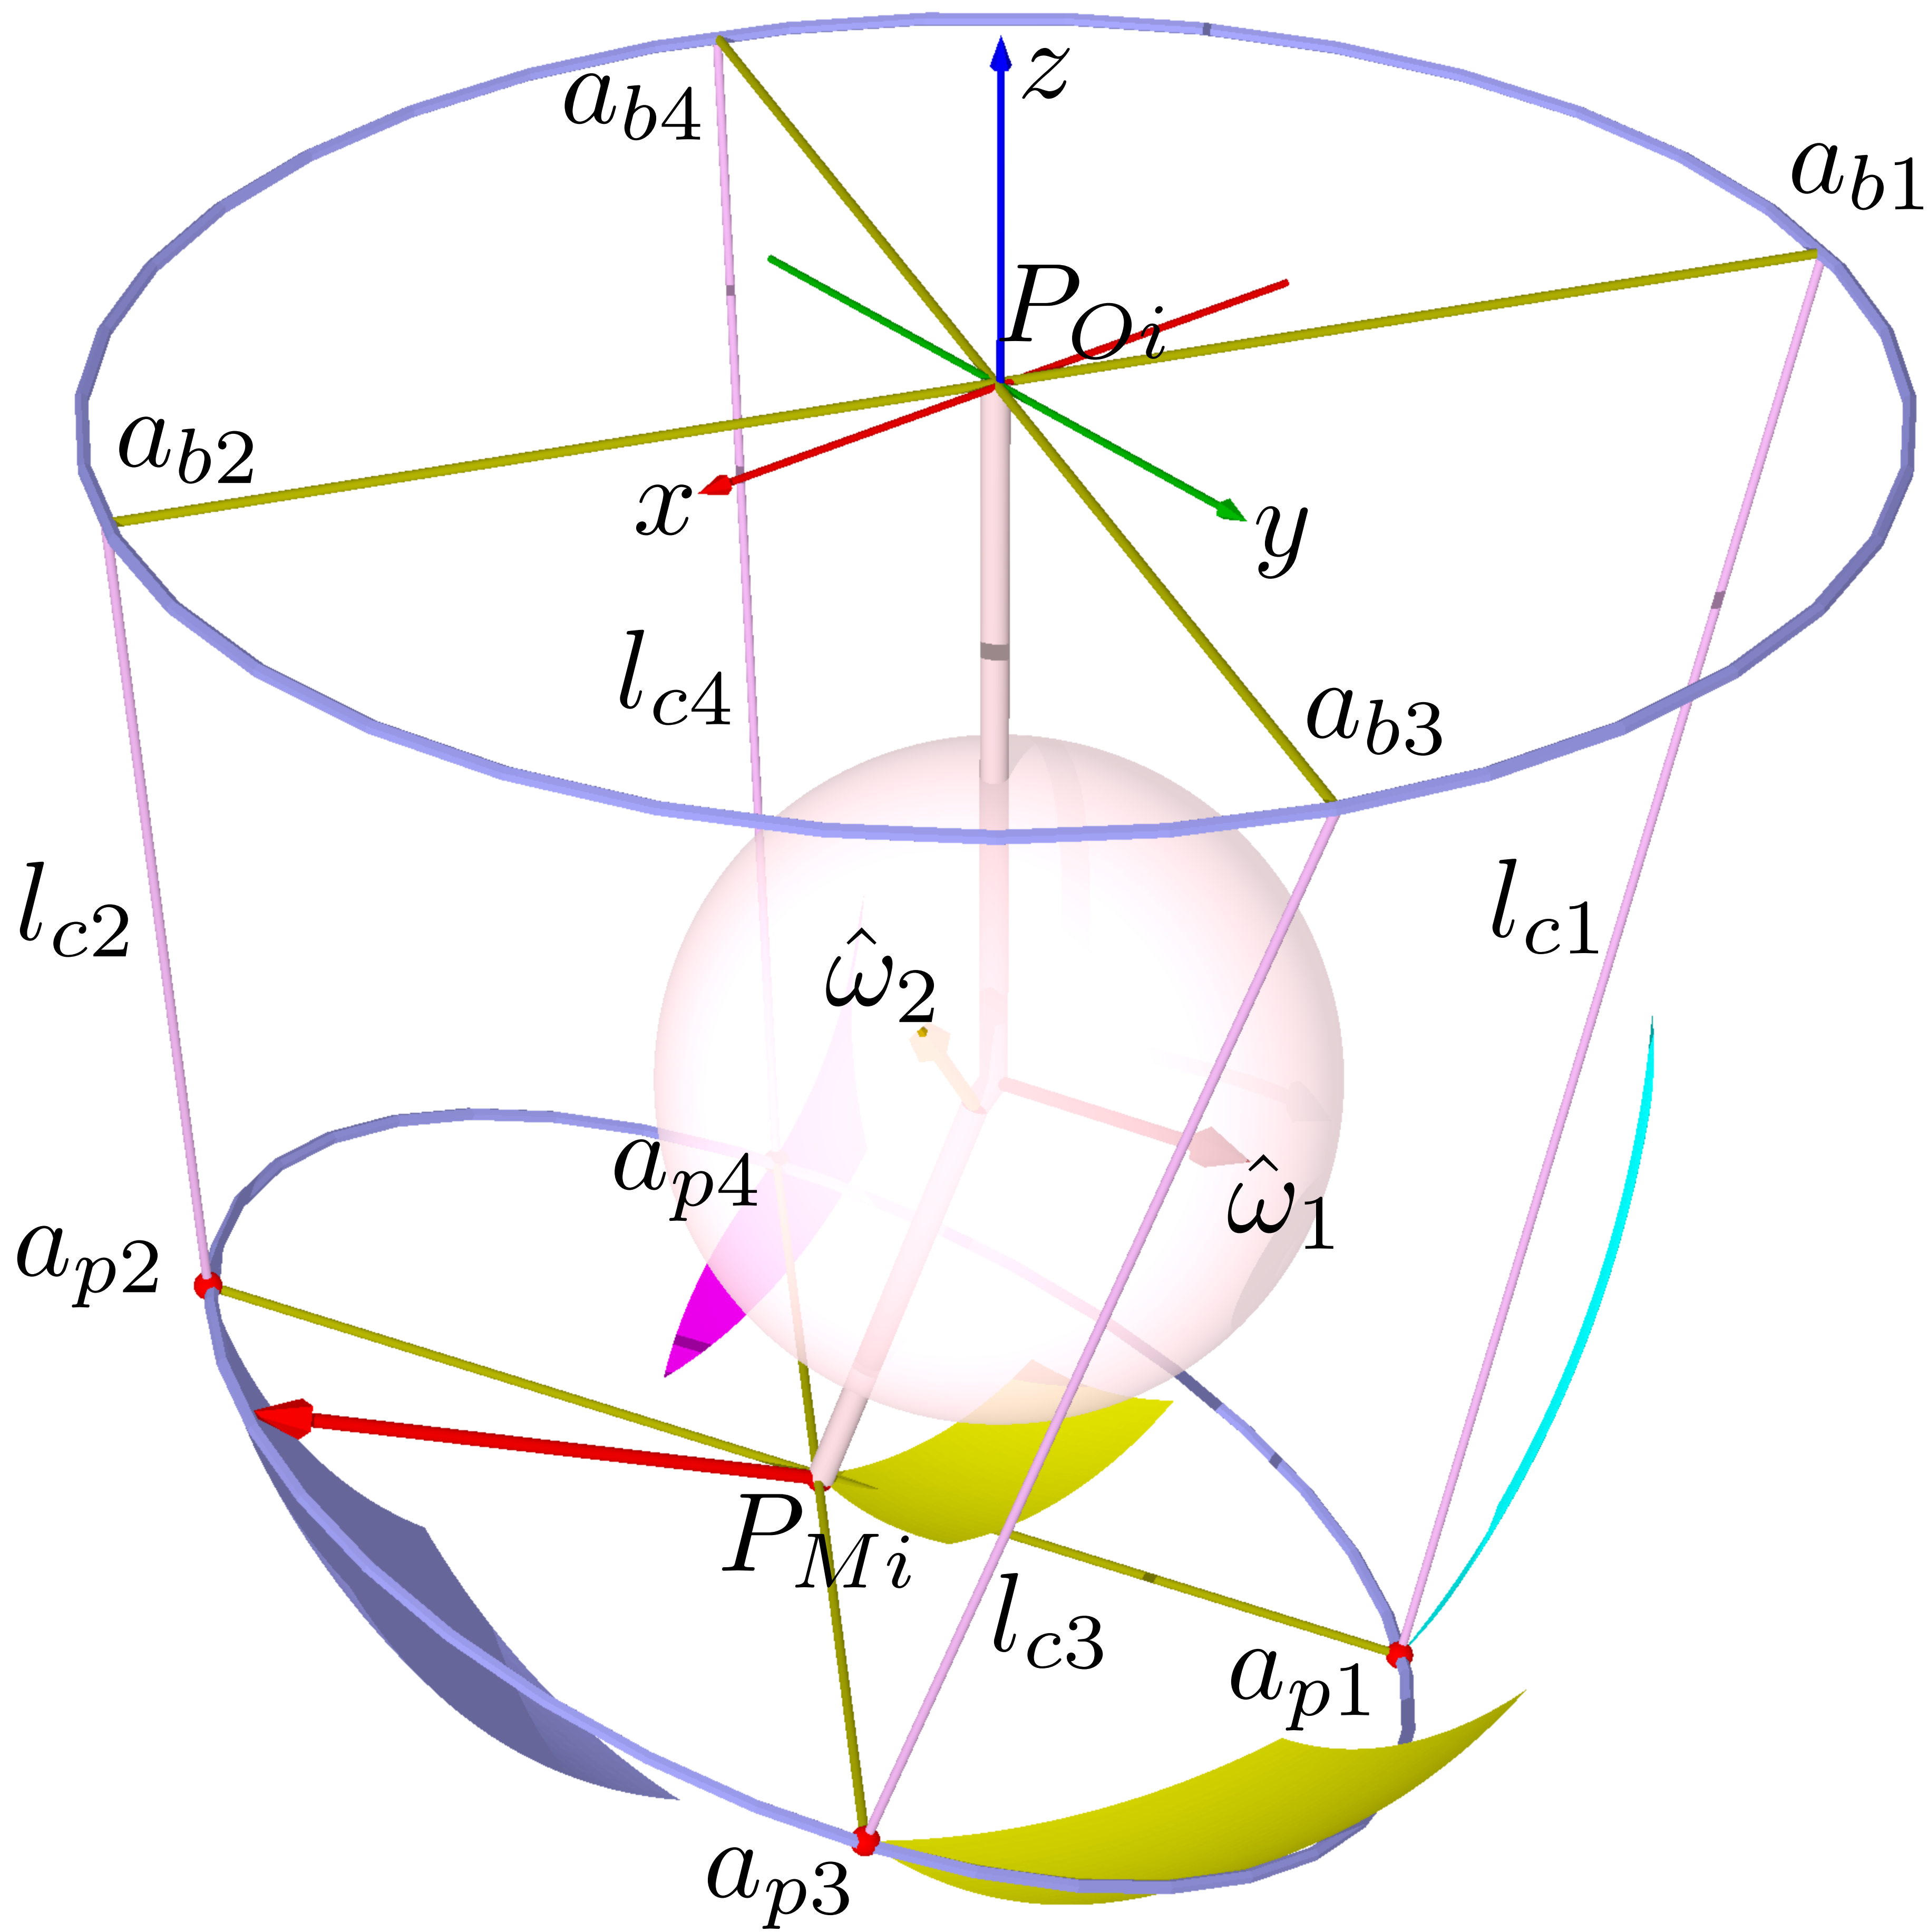

Supplement: s1 [file s1]

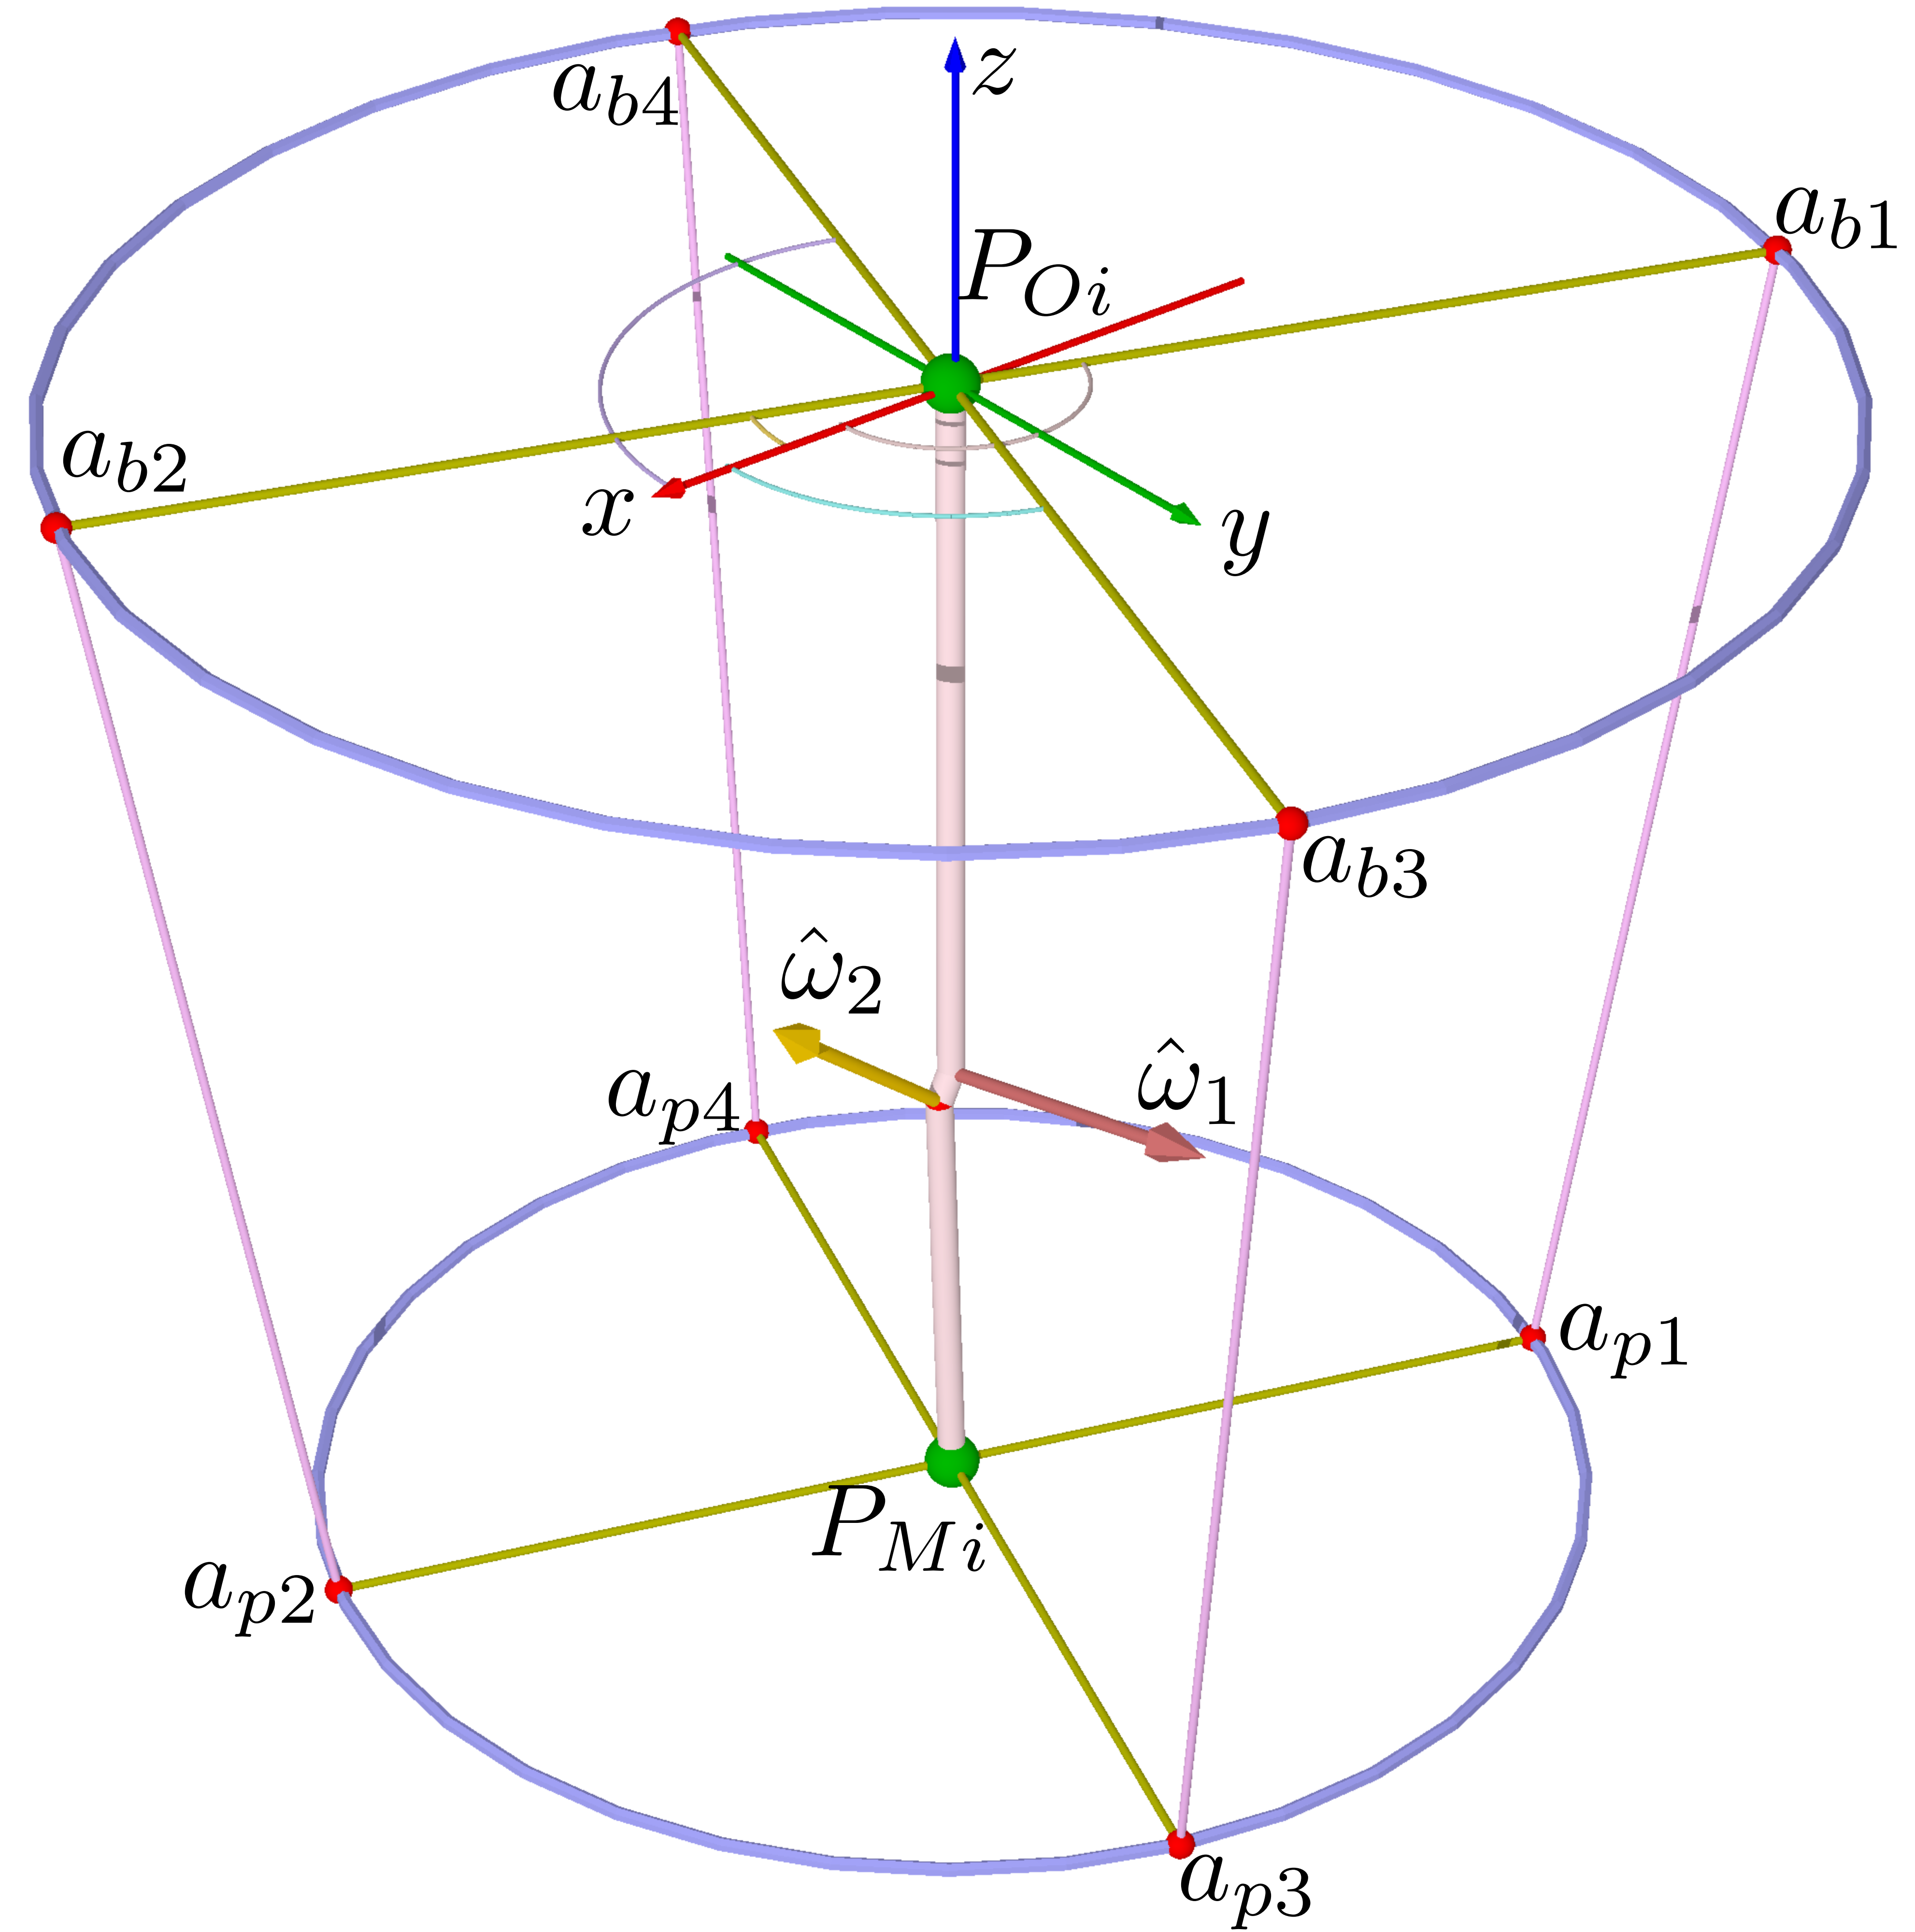

Supplement: s1 [file s1]

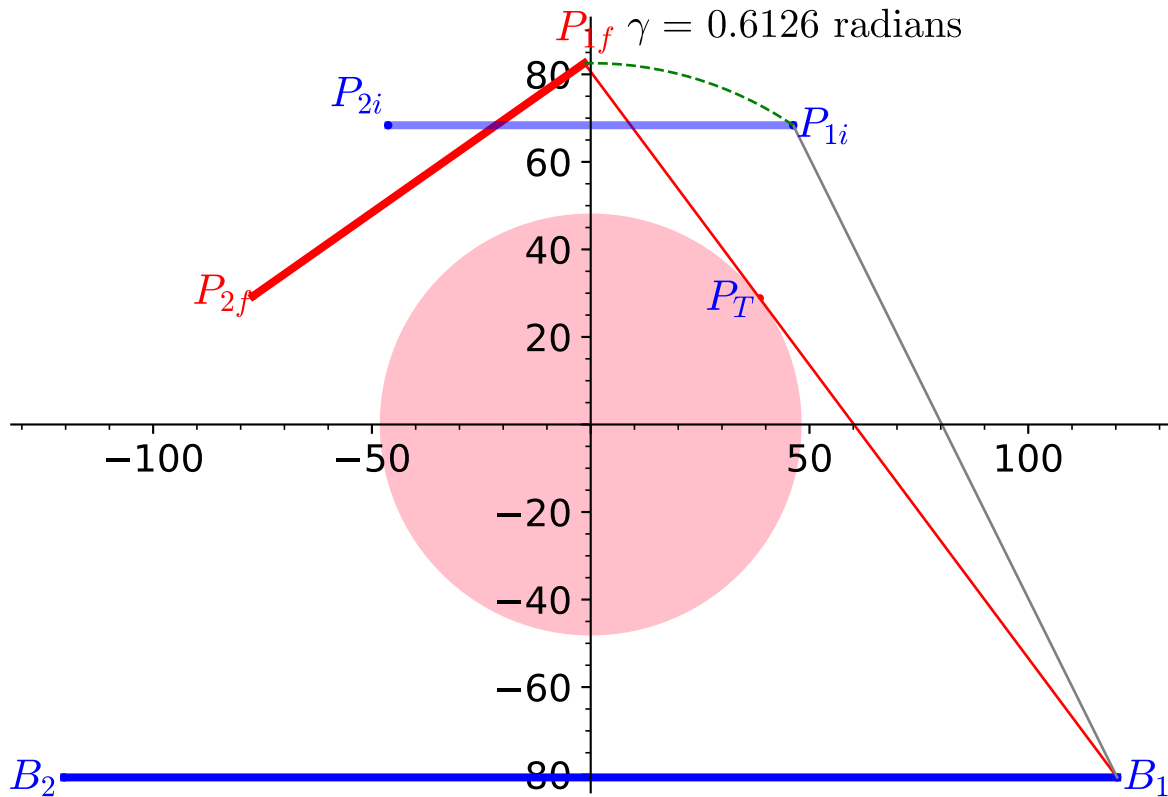

Supplement: s1 [file s1]

Rotated trajectory

Circle center

$P_O$

Estimated center

$\hat{\omega}_1$

Trajectory

$B_0$

$A_0$

$PM_0$

$C_0$

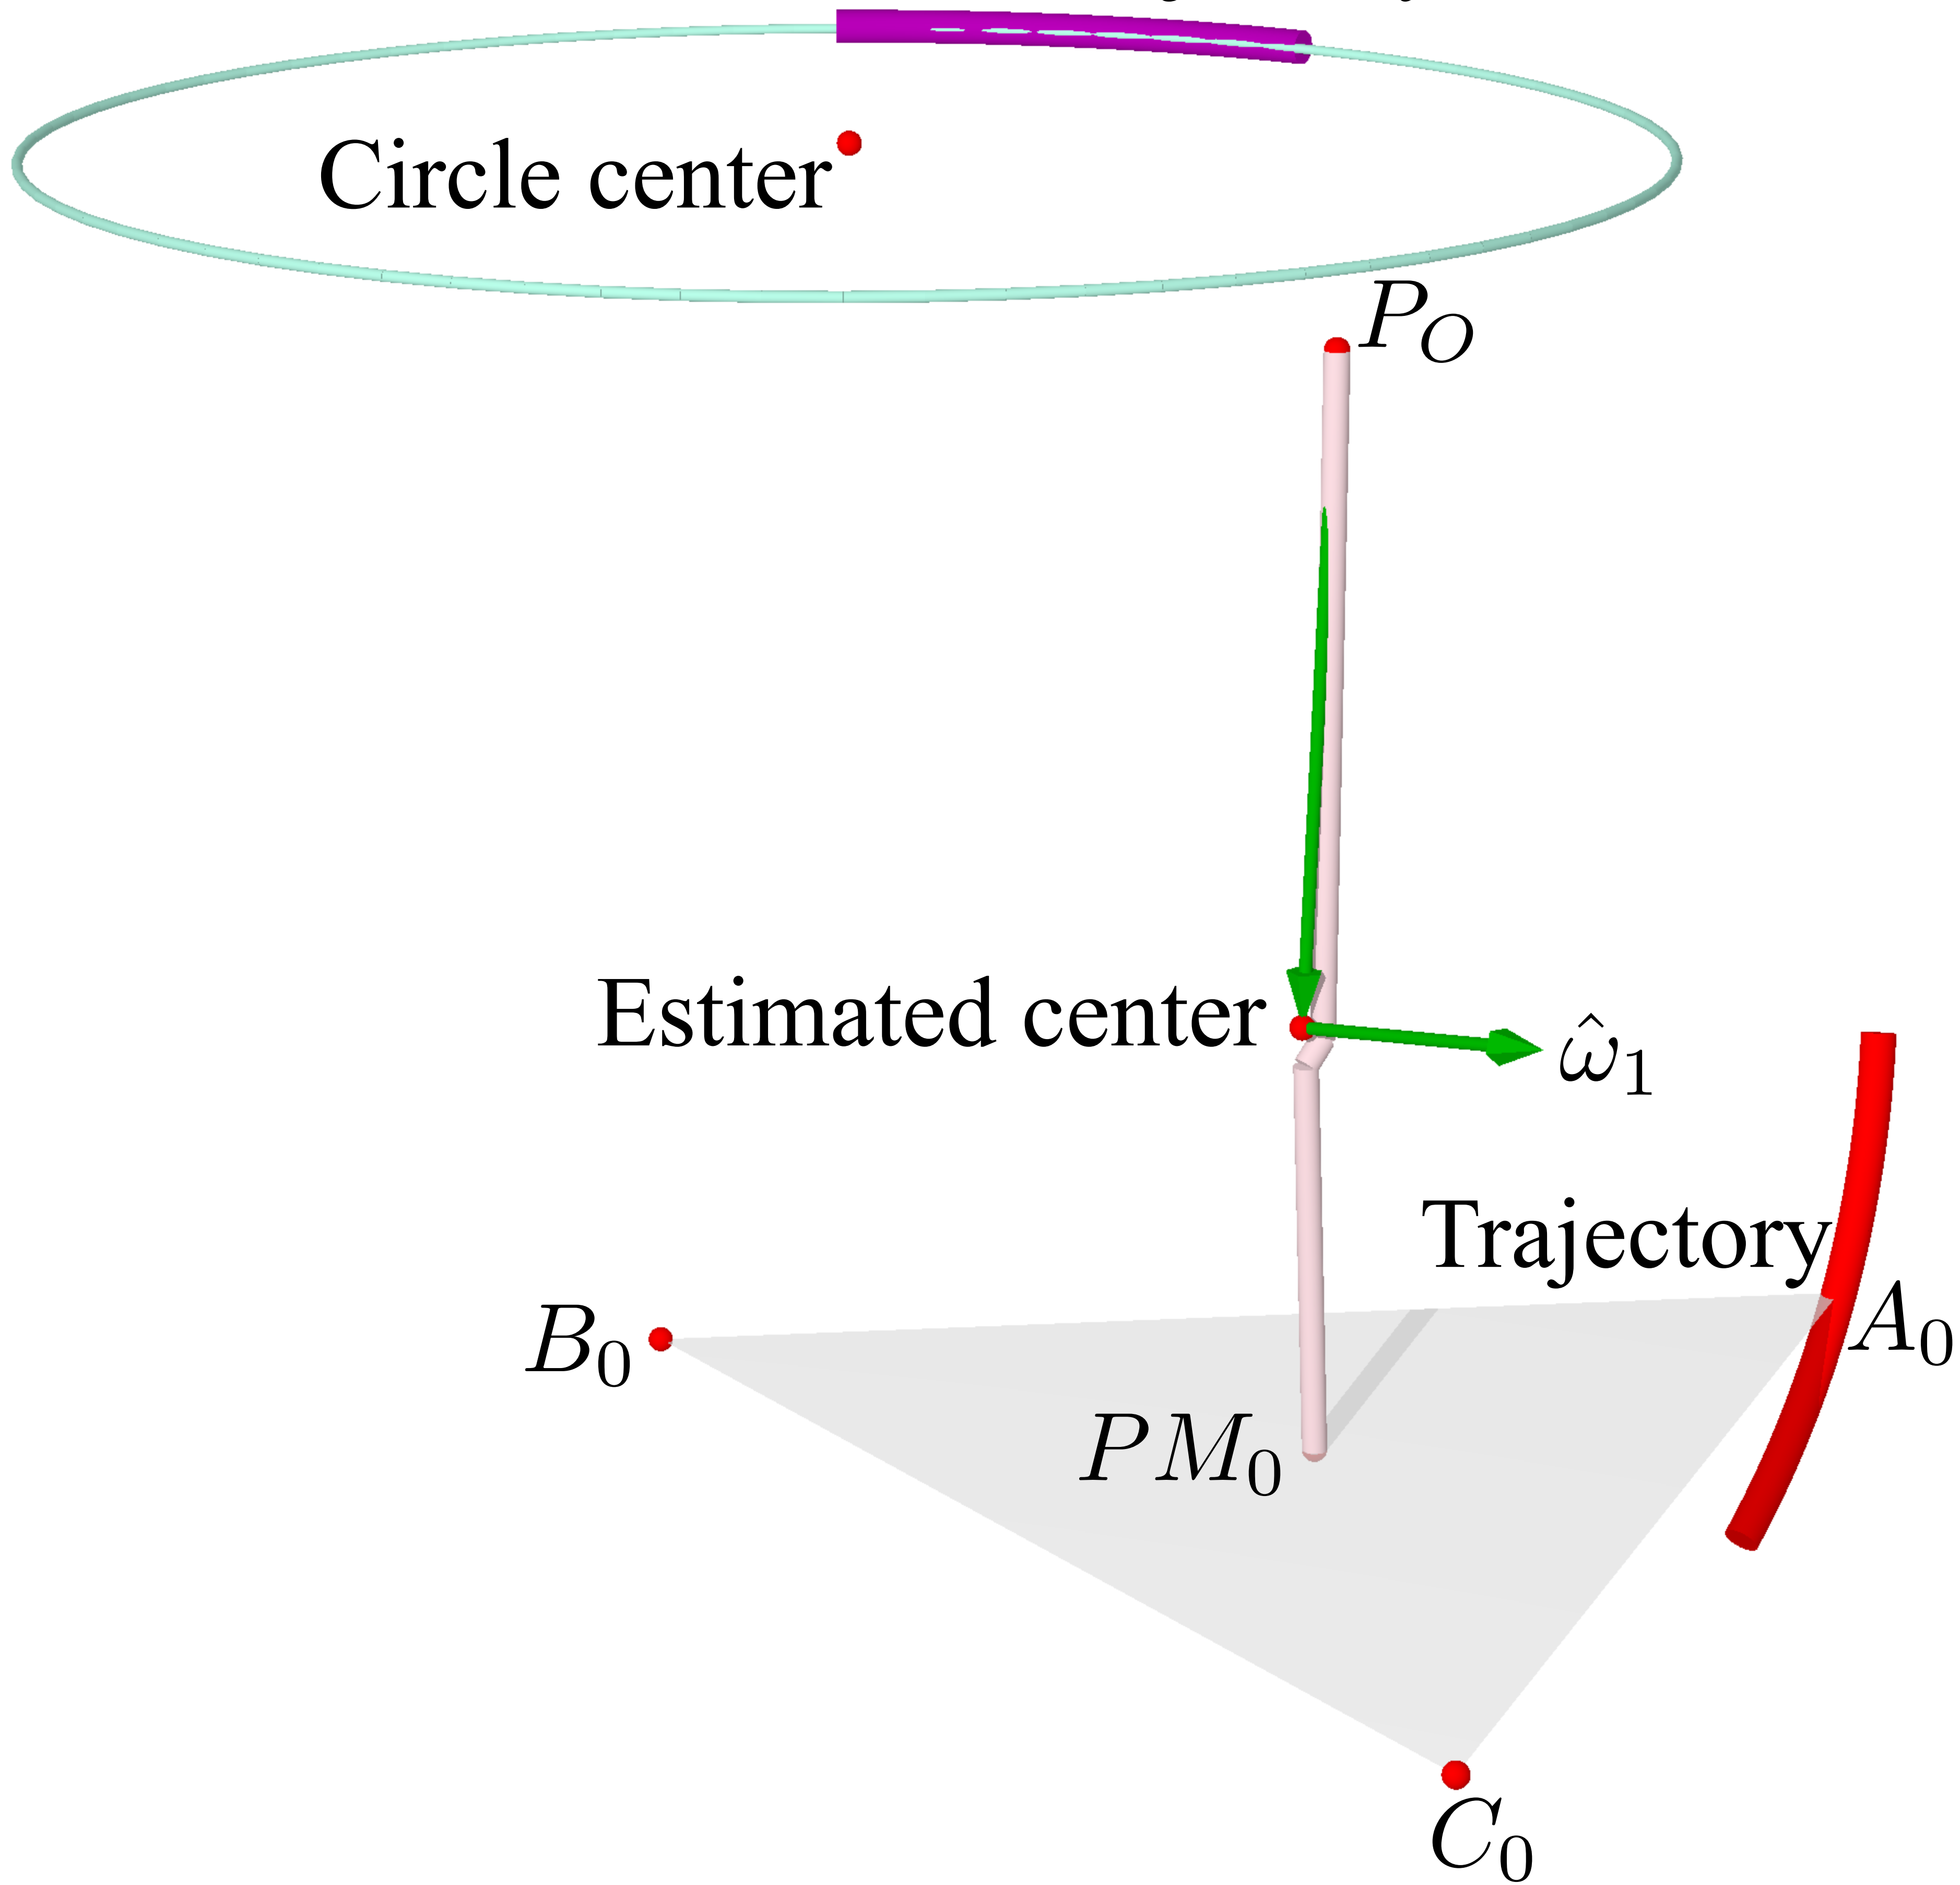

Supplement: s1 [file s1]

Rotated trajectory

Circle center•

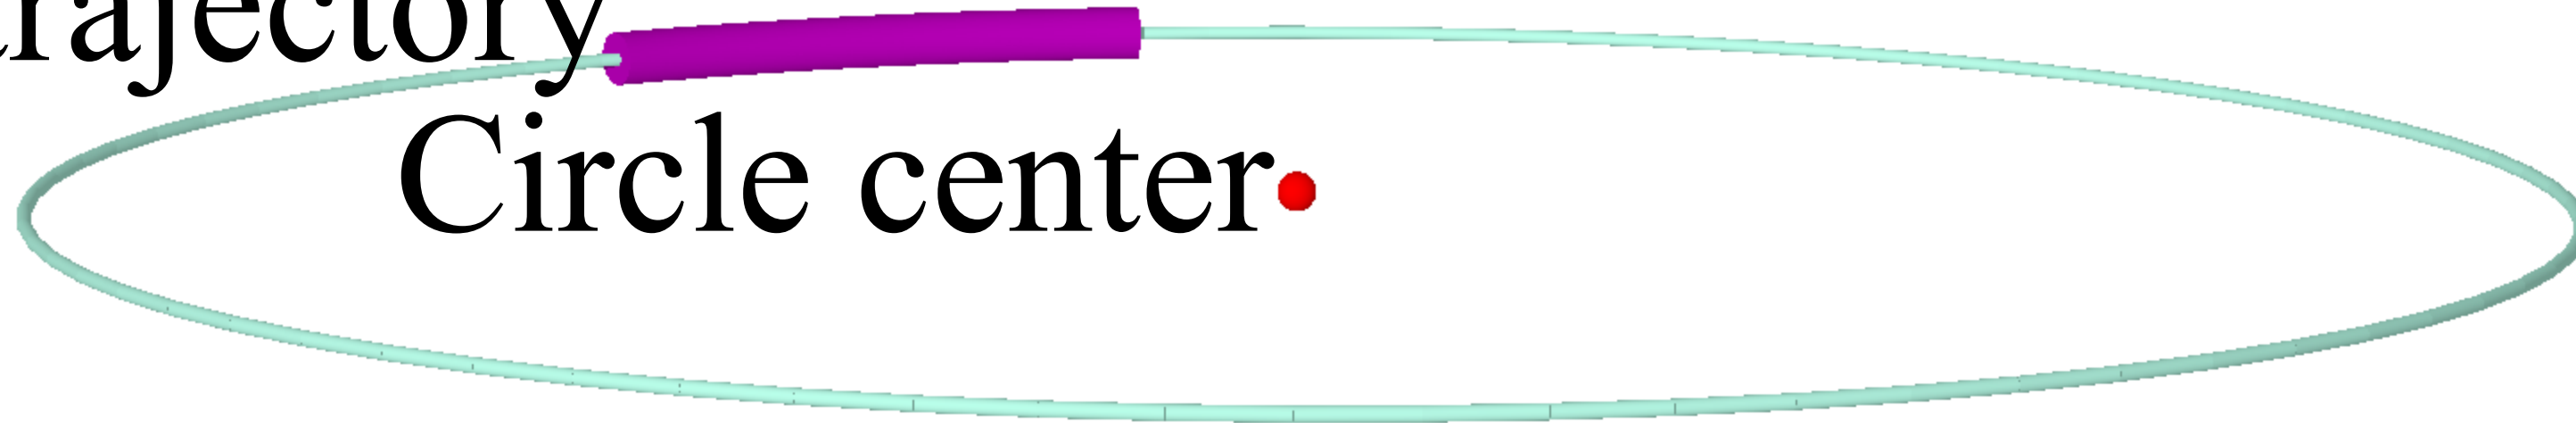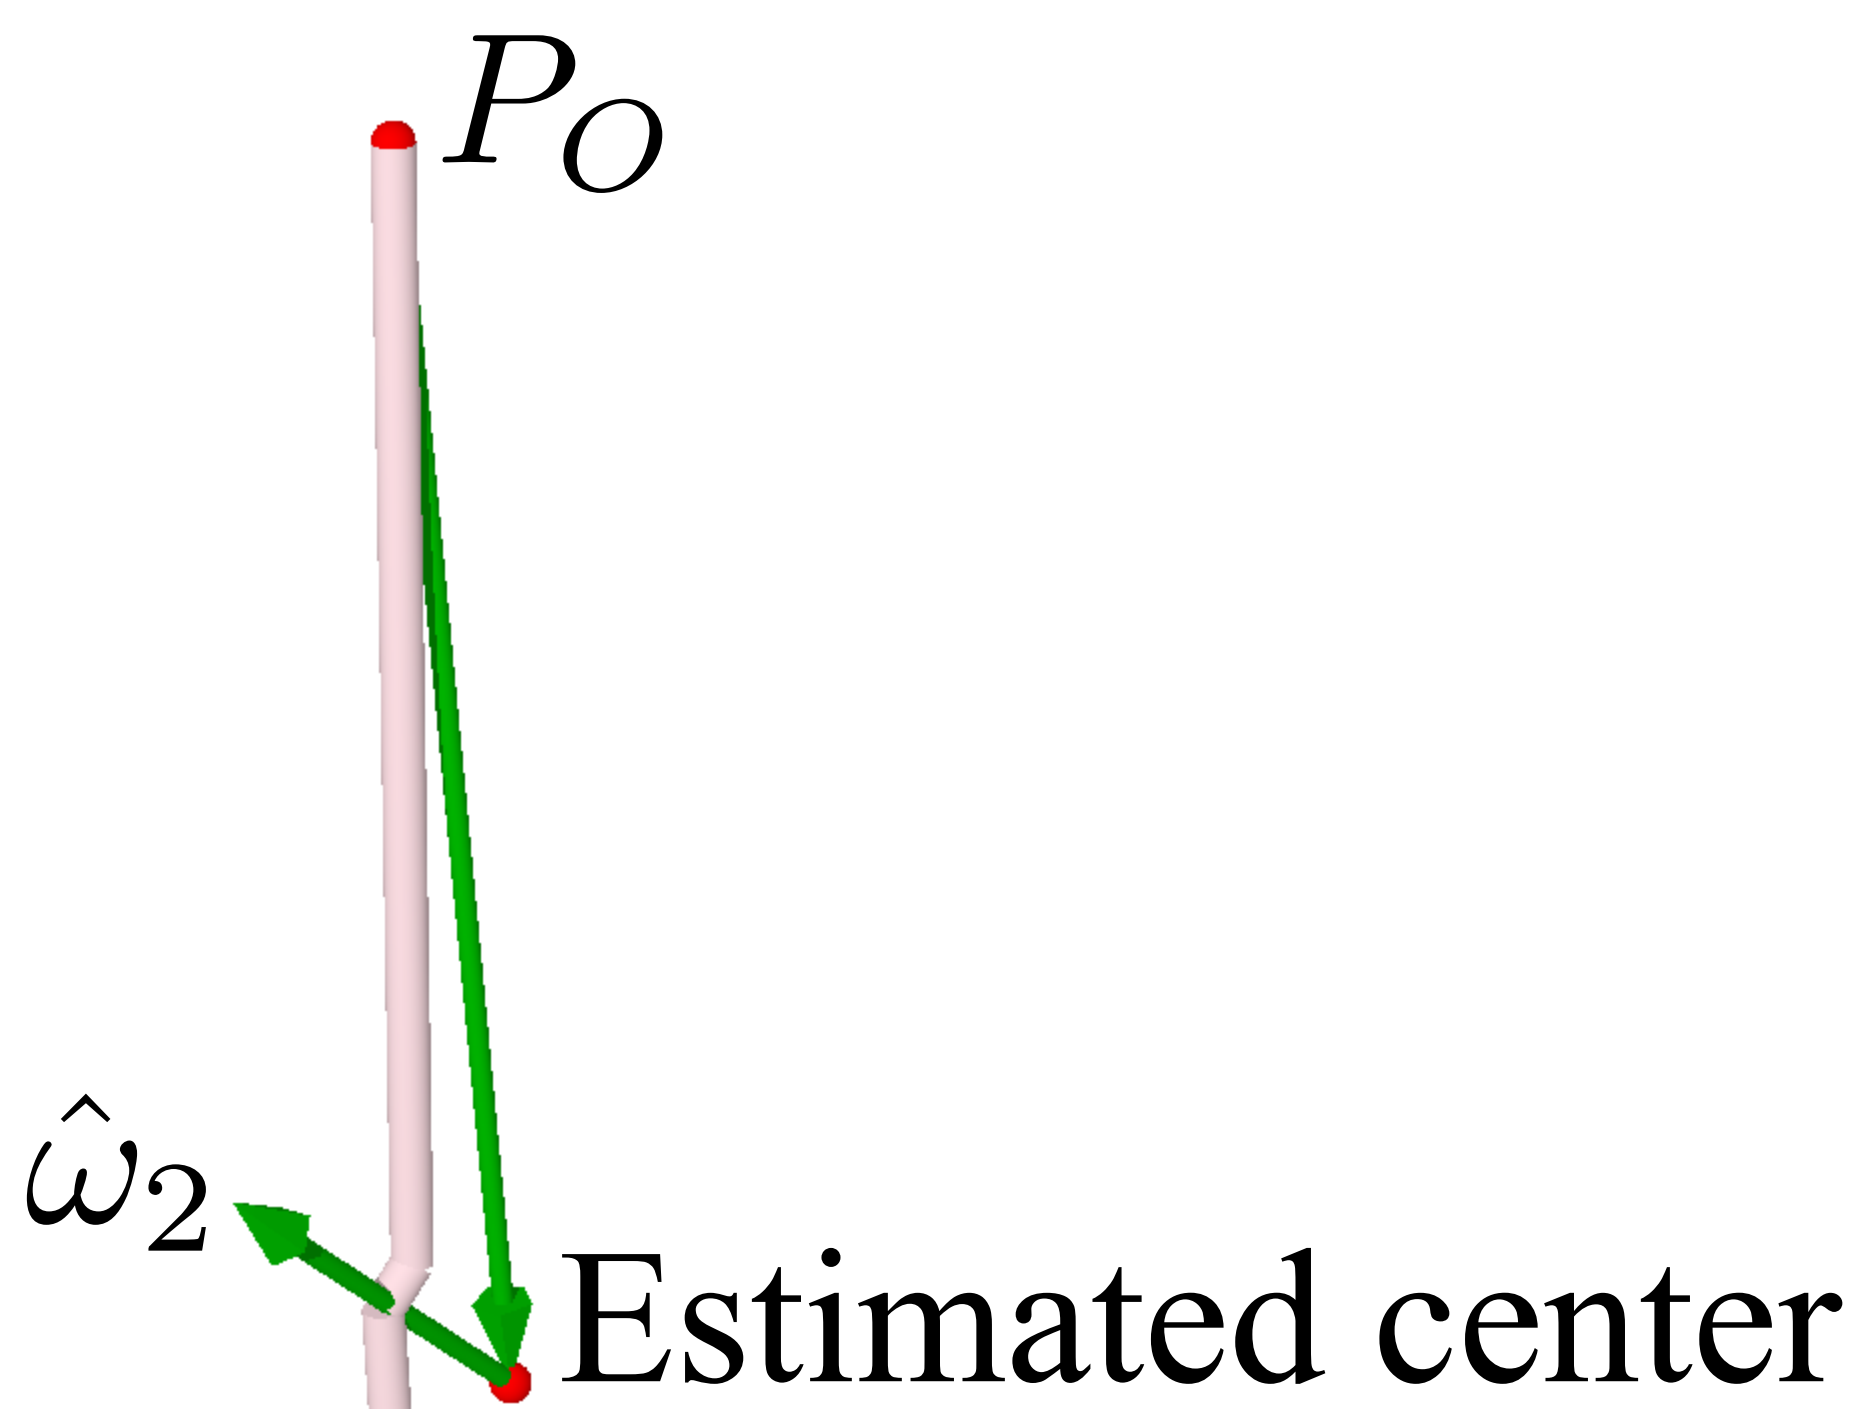

Trajectory

$PM_0$

$C_0$

Supplement: s1 [file s1]

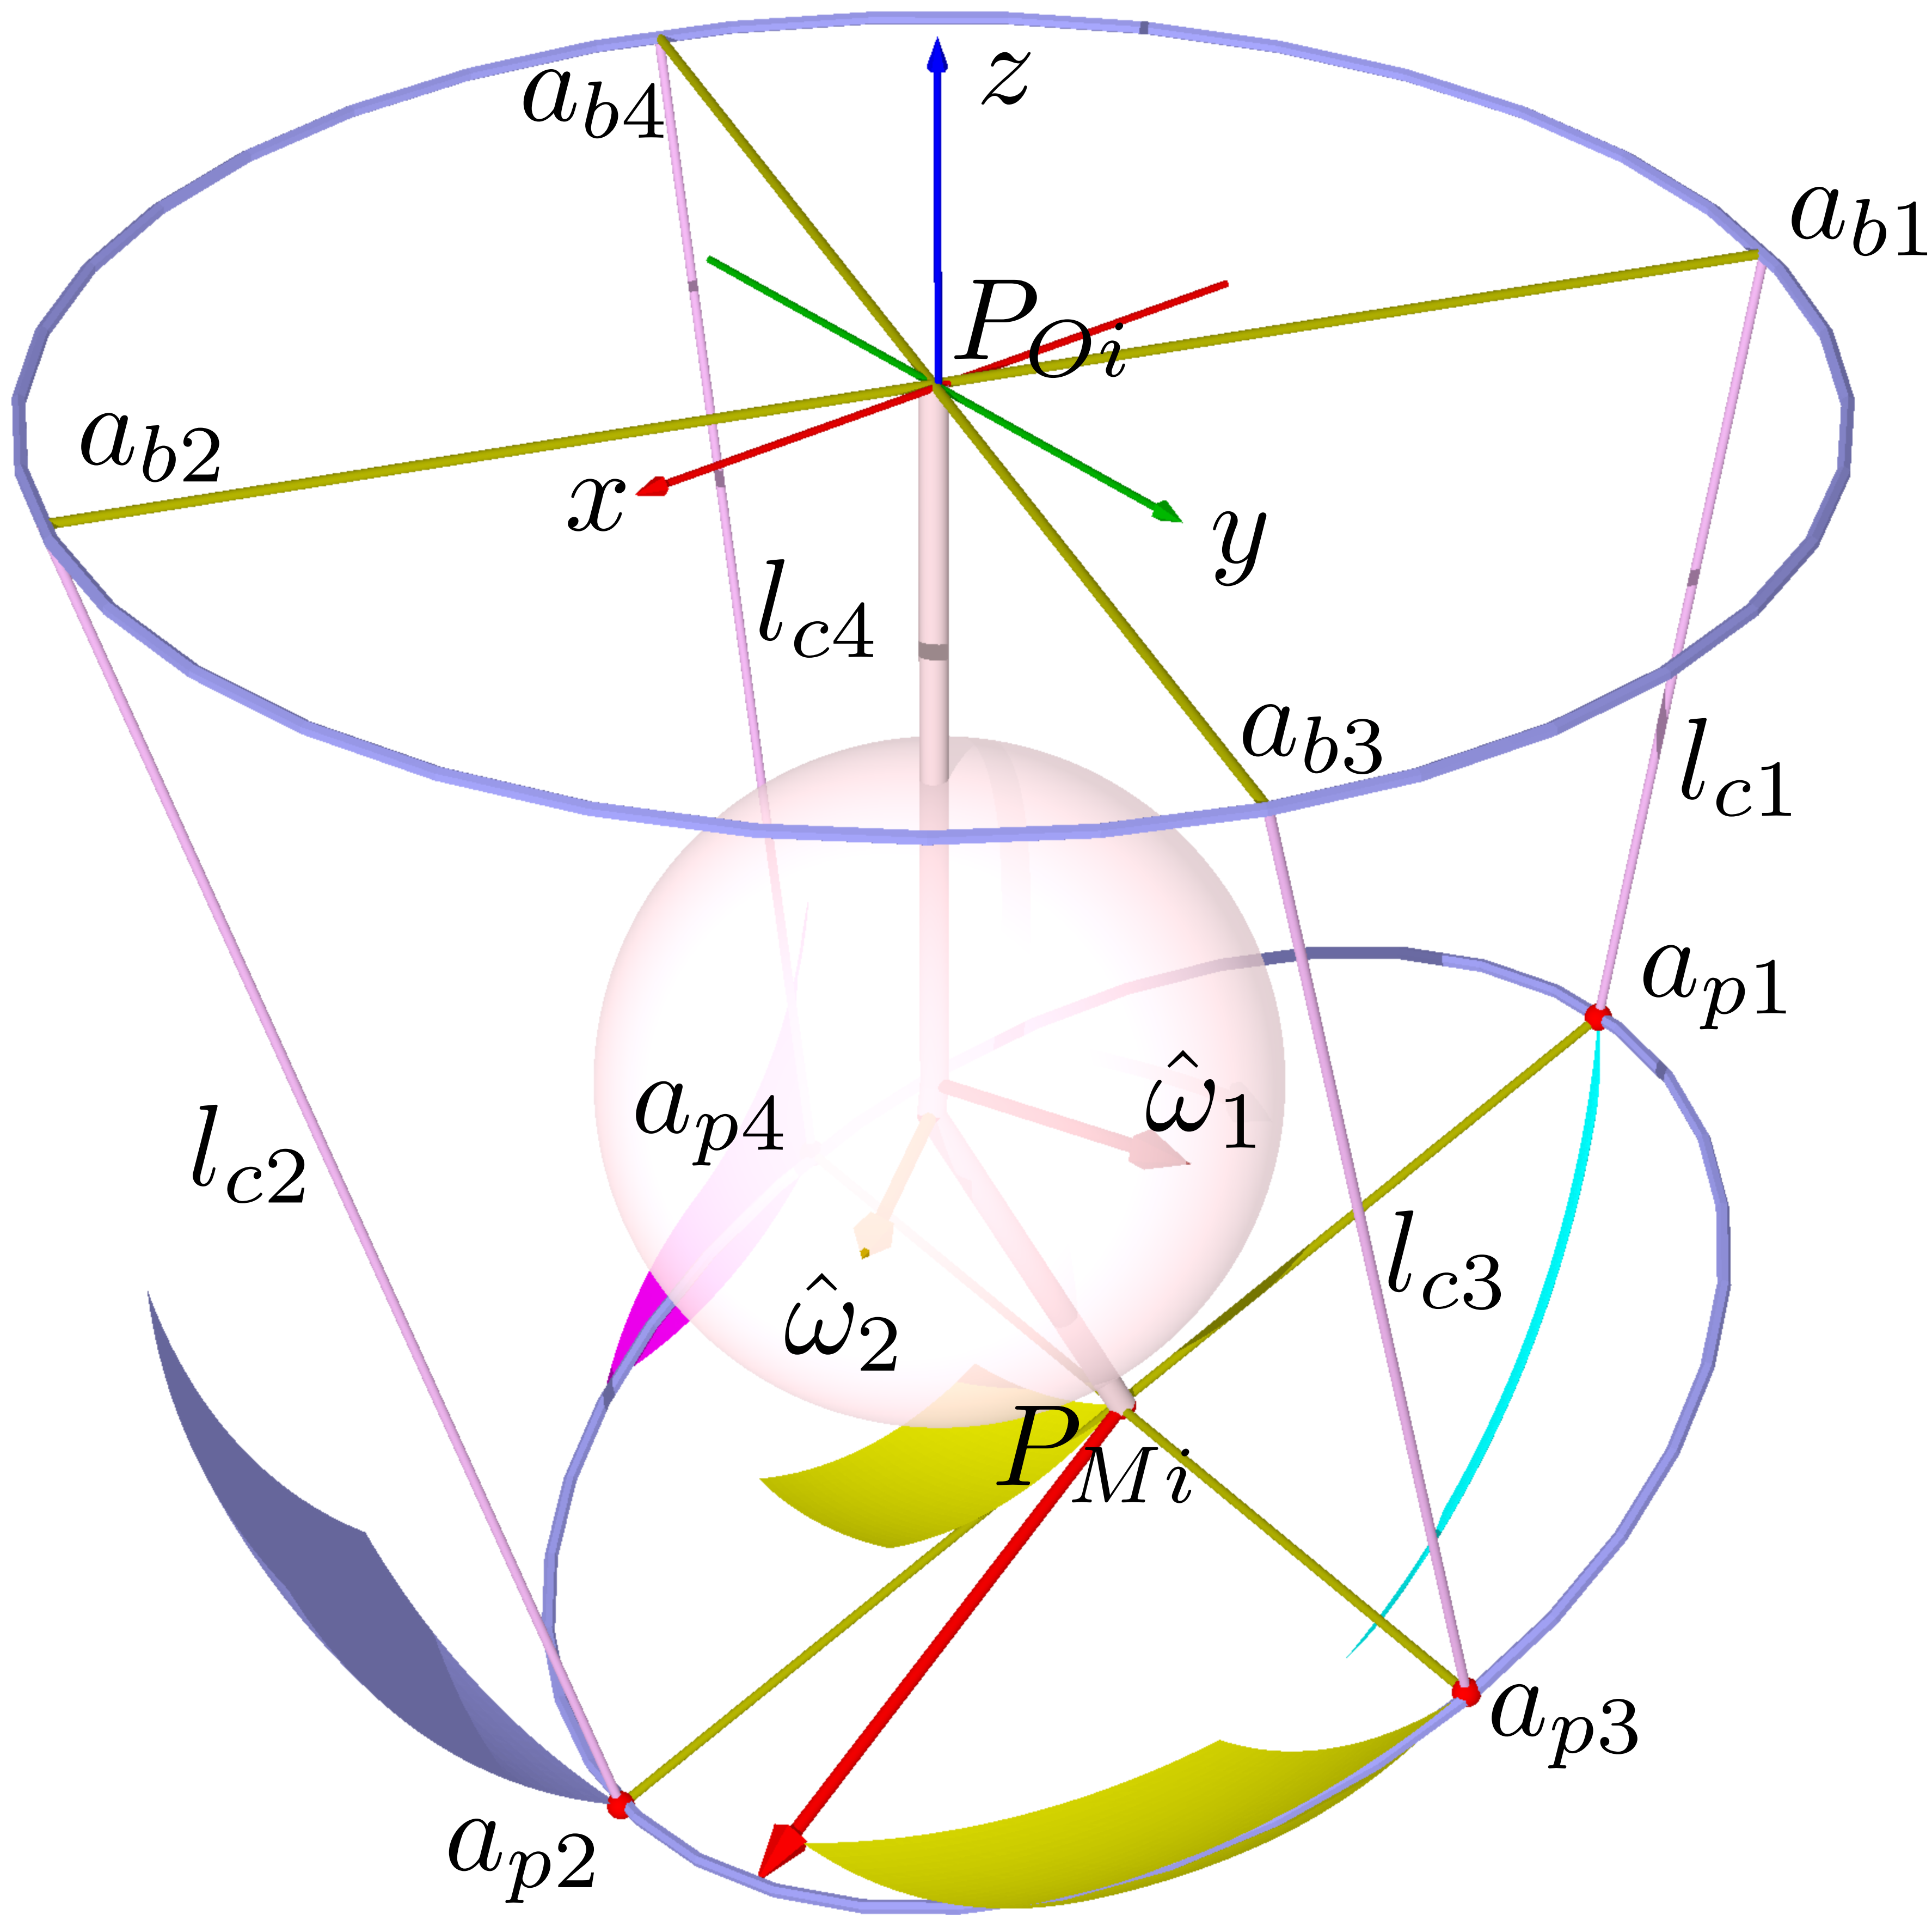

Supplement: s1 [file s1]

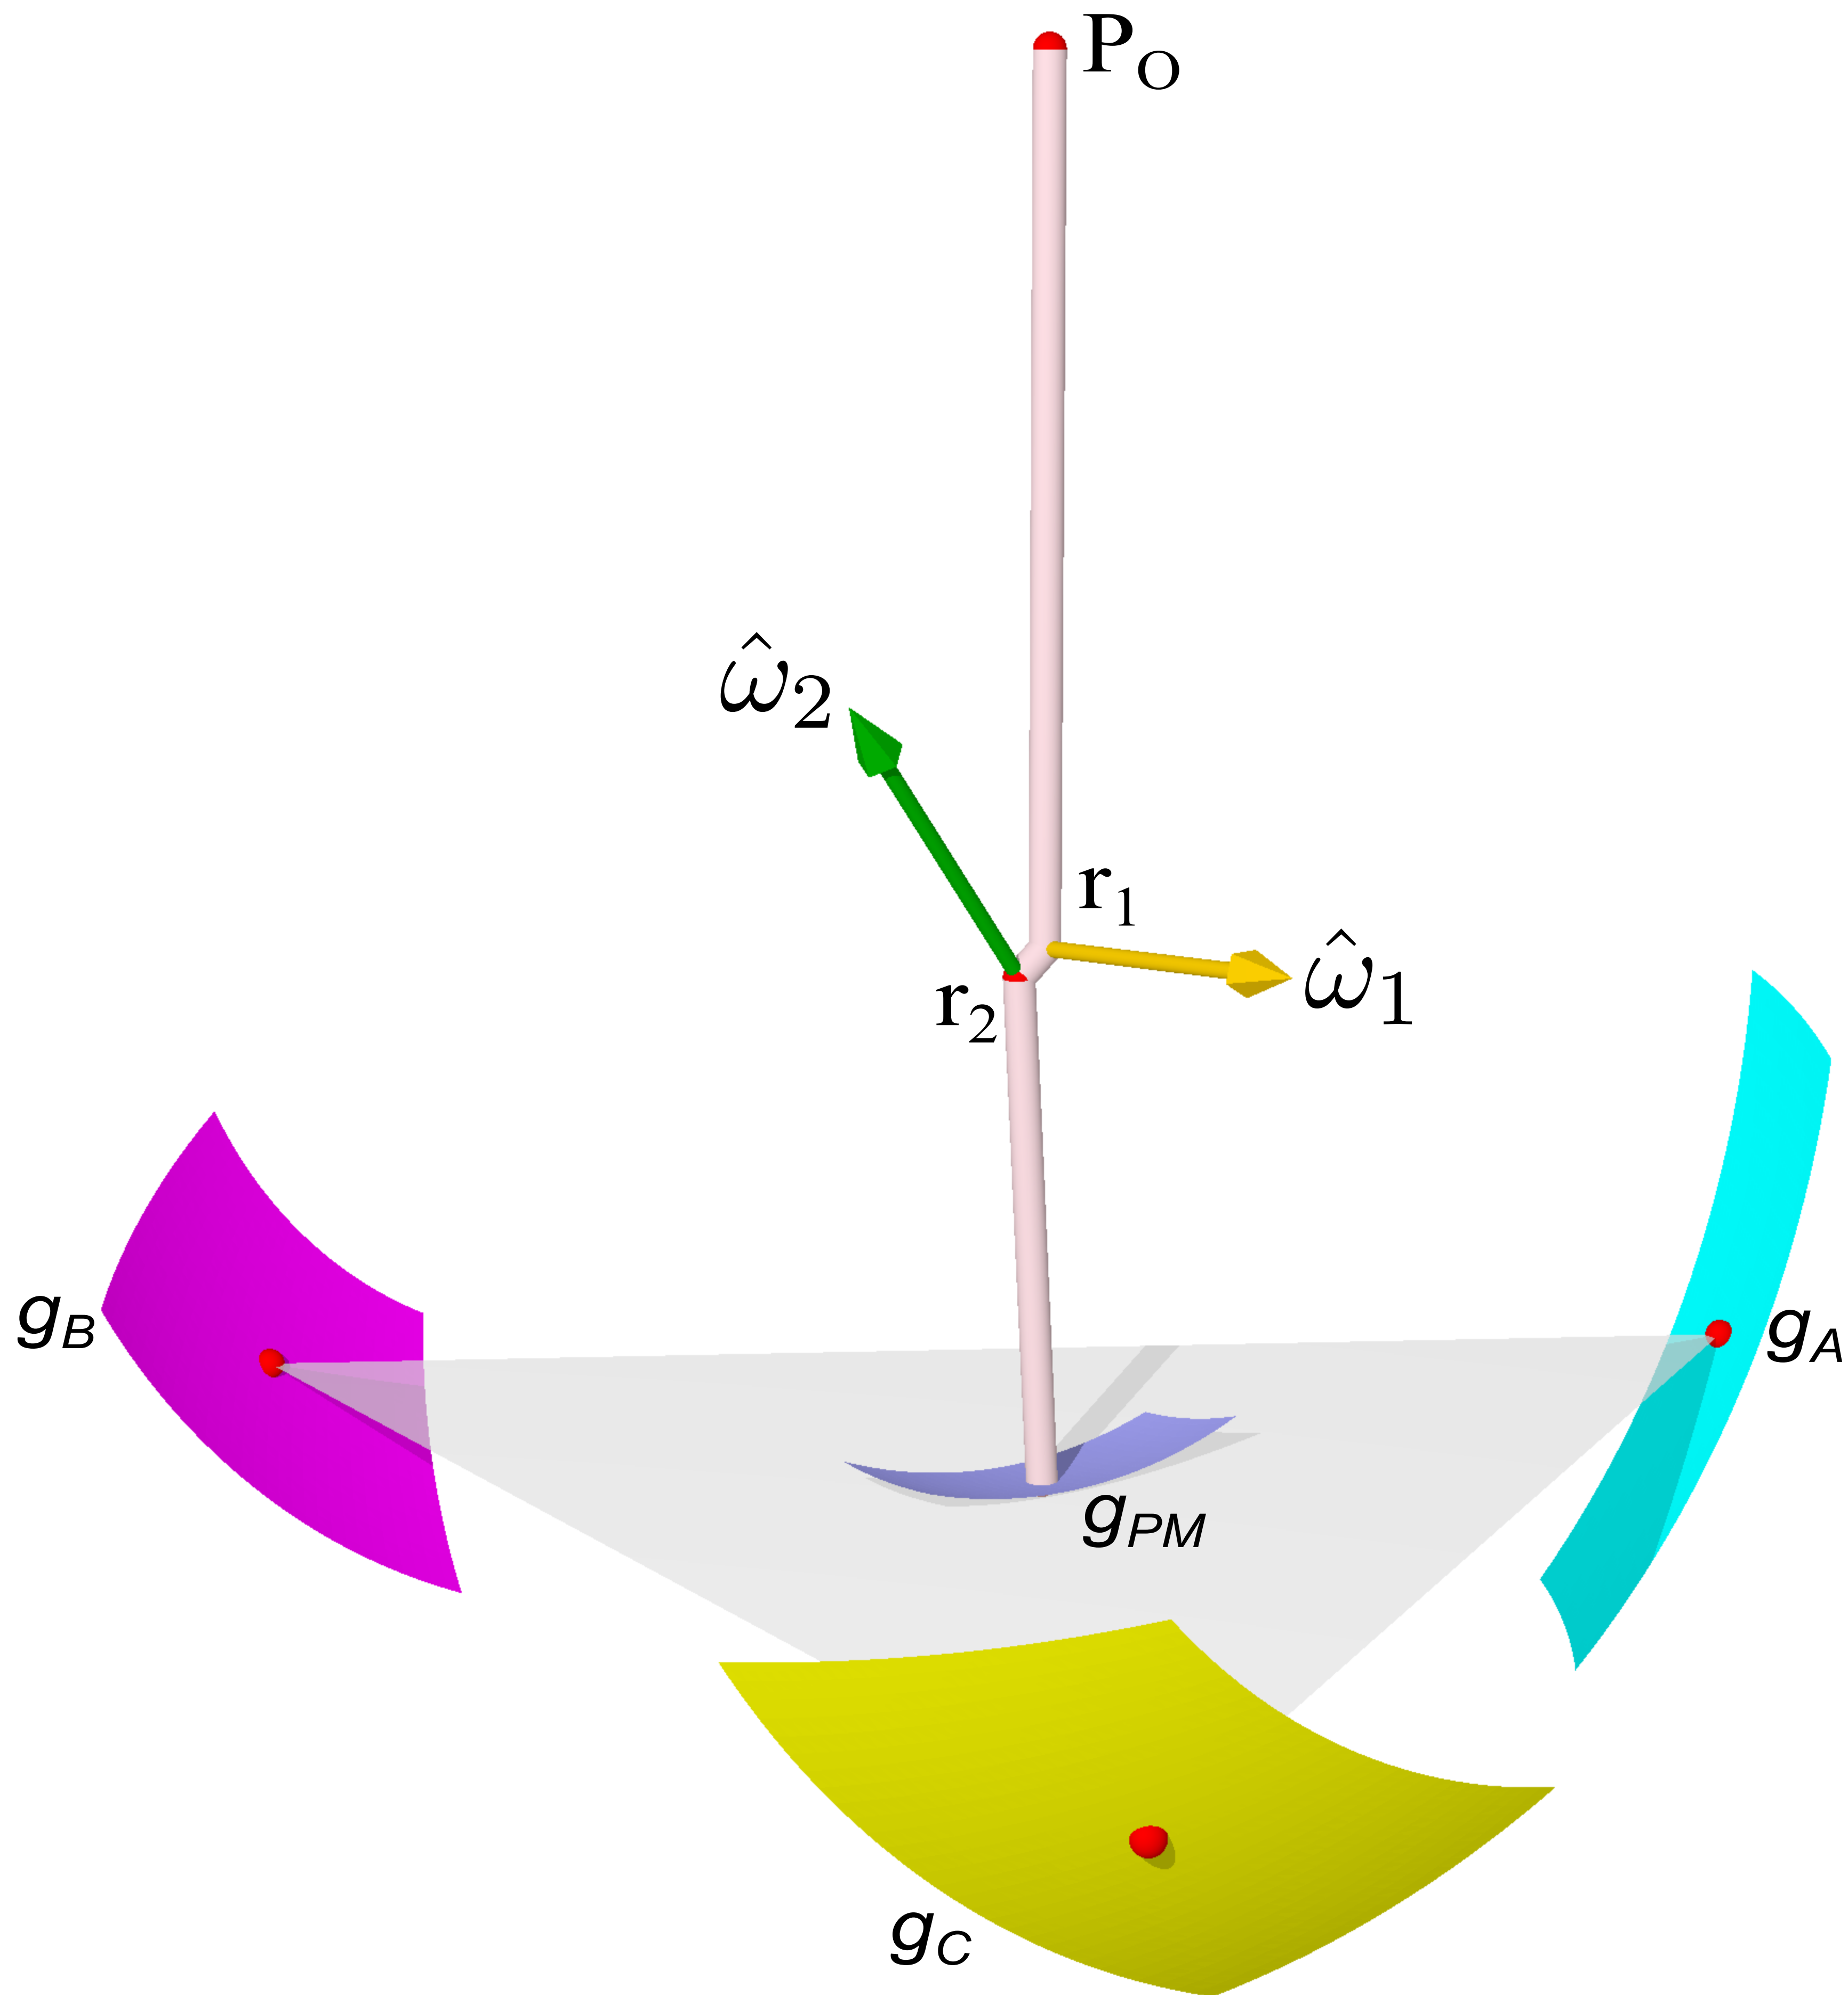

Supplement: s1 [file s1]

enter.

## Rotated trajectory

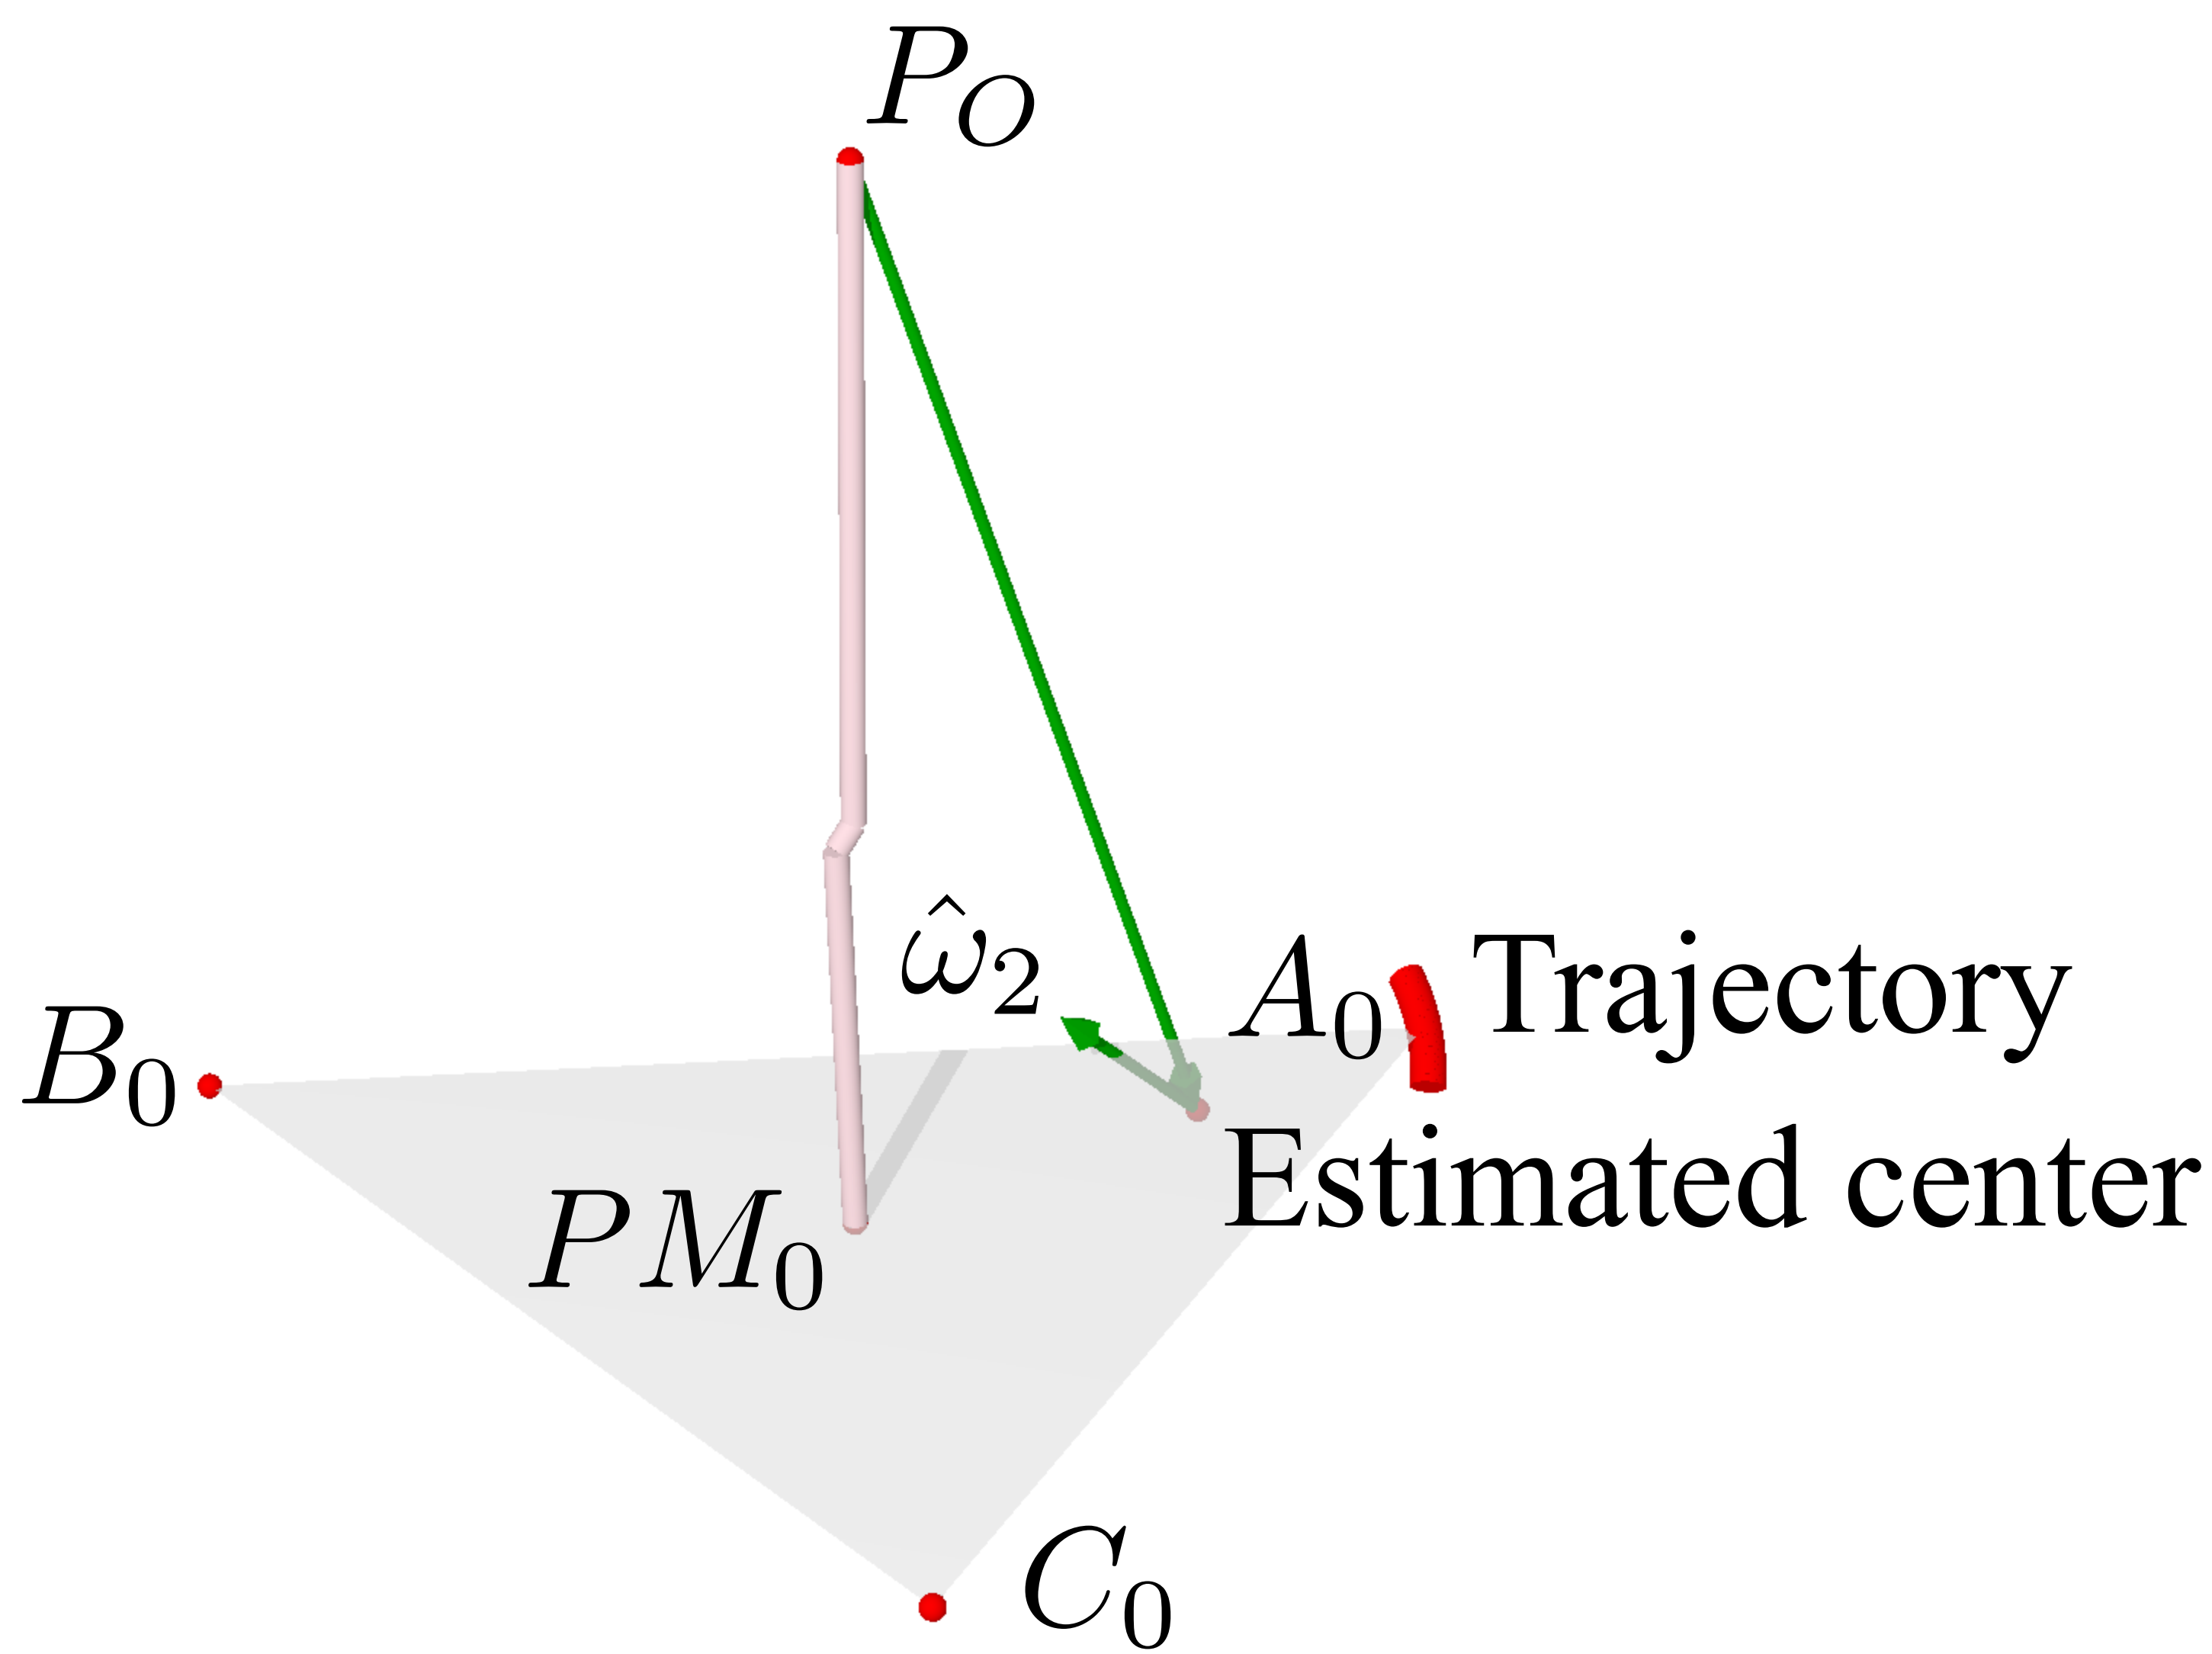

Supplement: s1 [file s1]

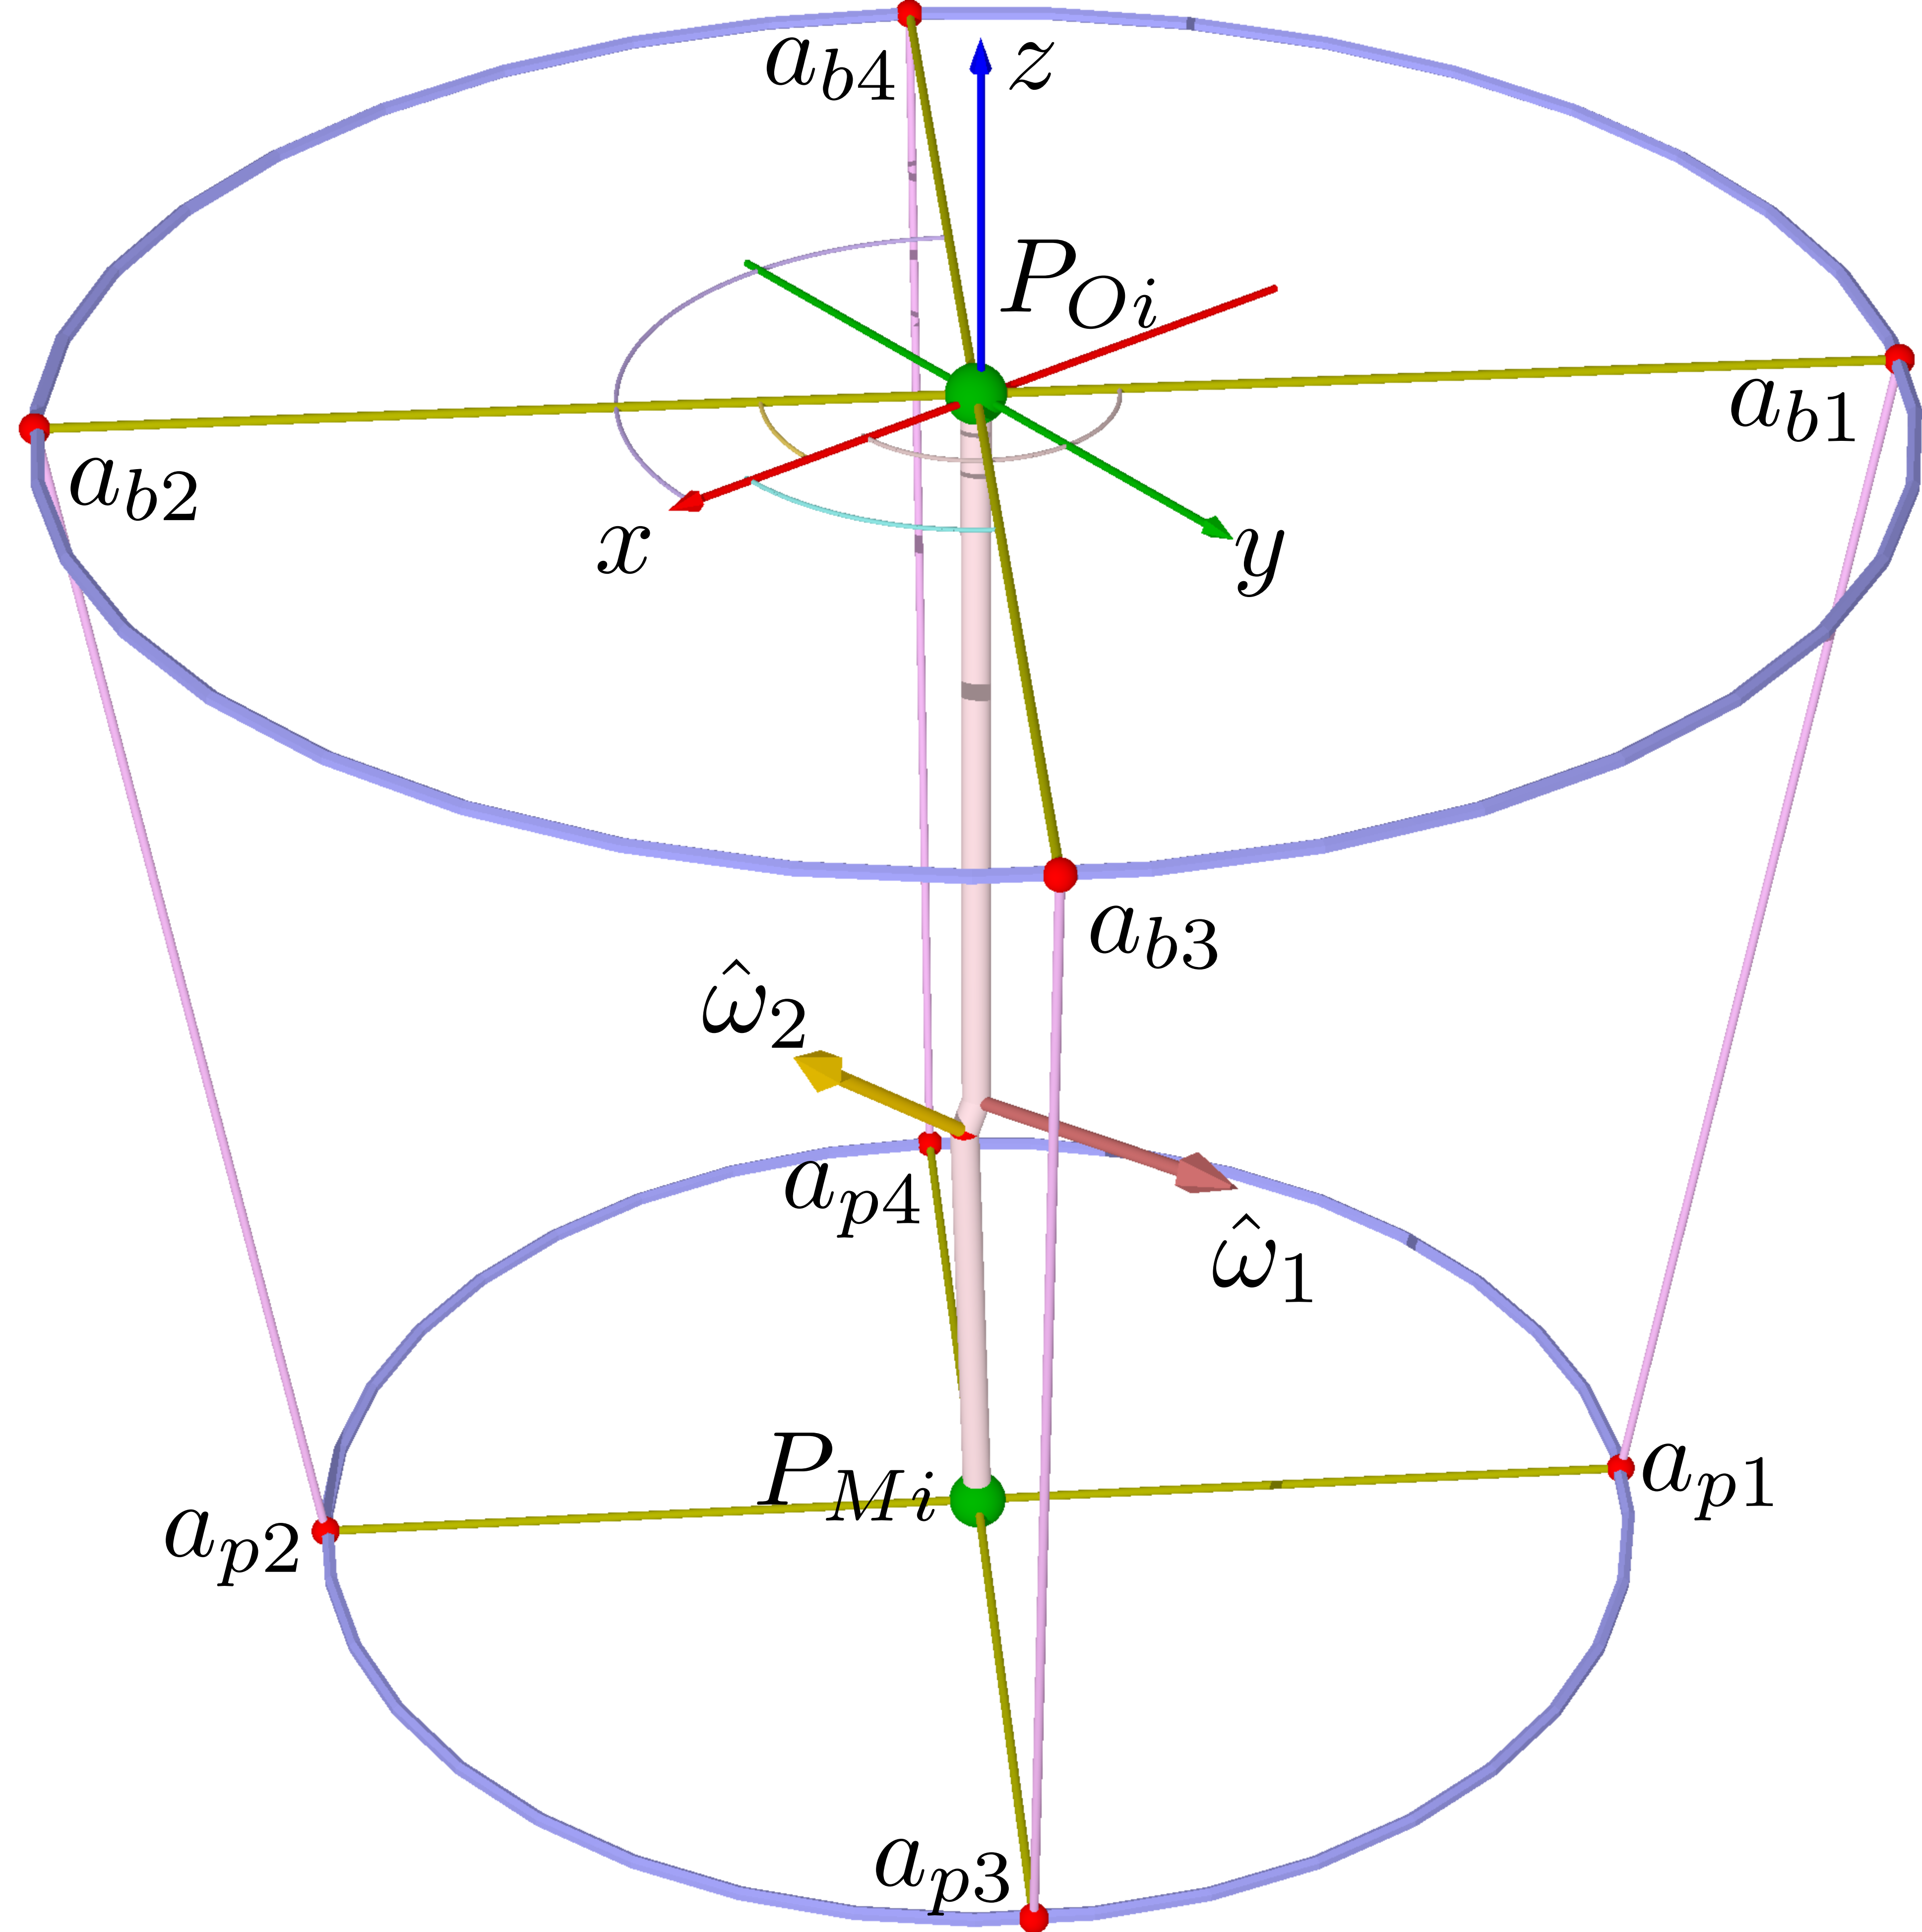

Supplement: s1 [file s1]

$$(x + 1)^2 + (y + \sqrt{3})^2 + z^2 - 49 = 0$$

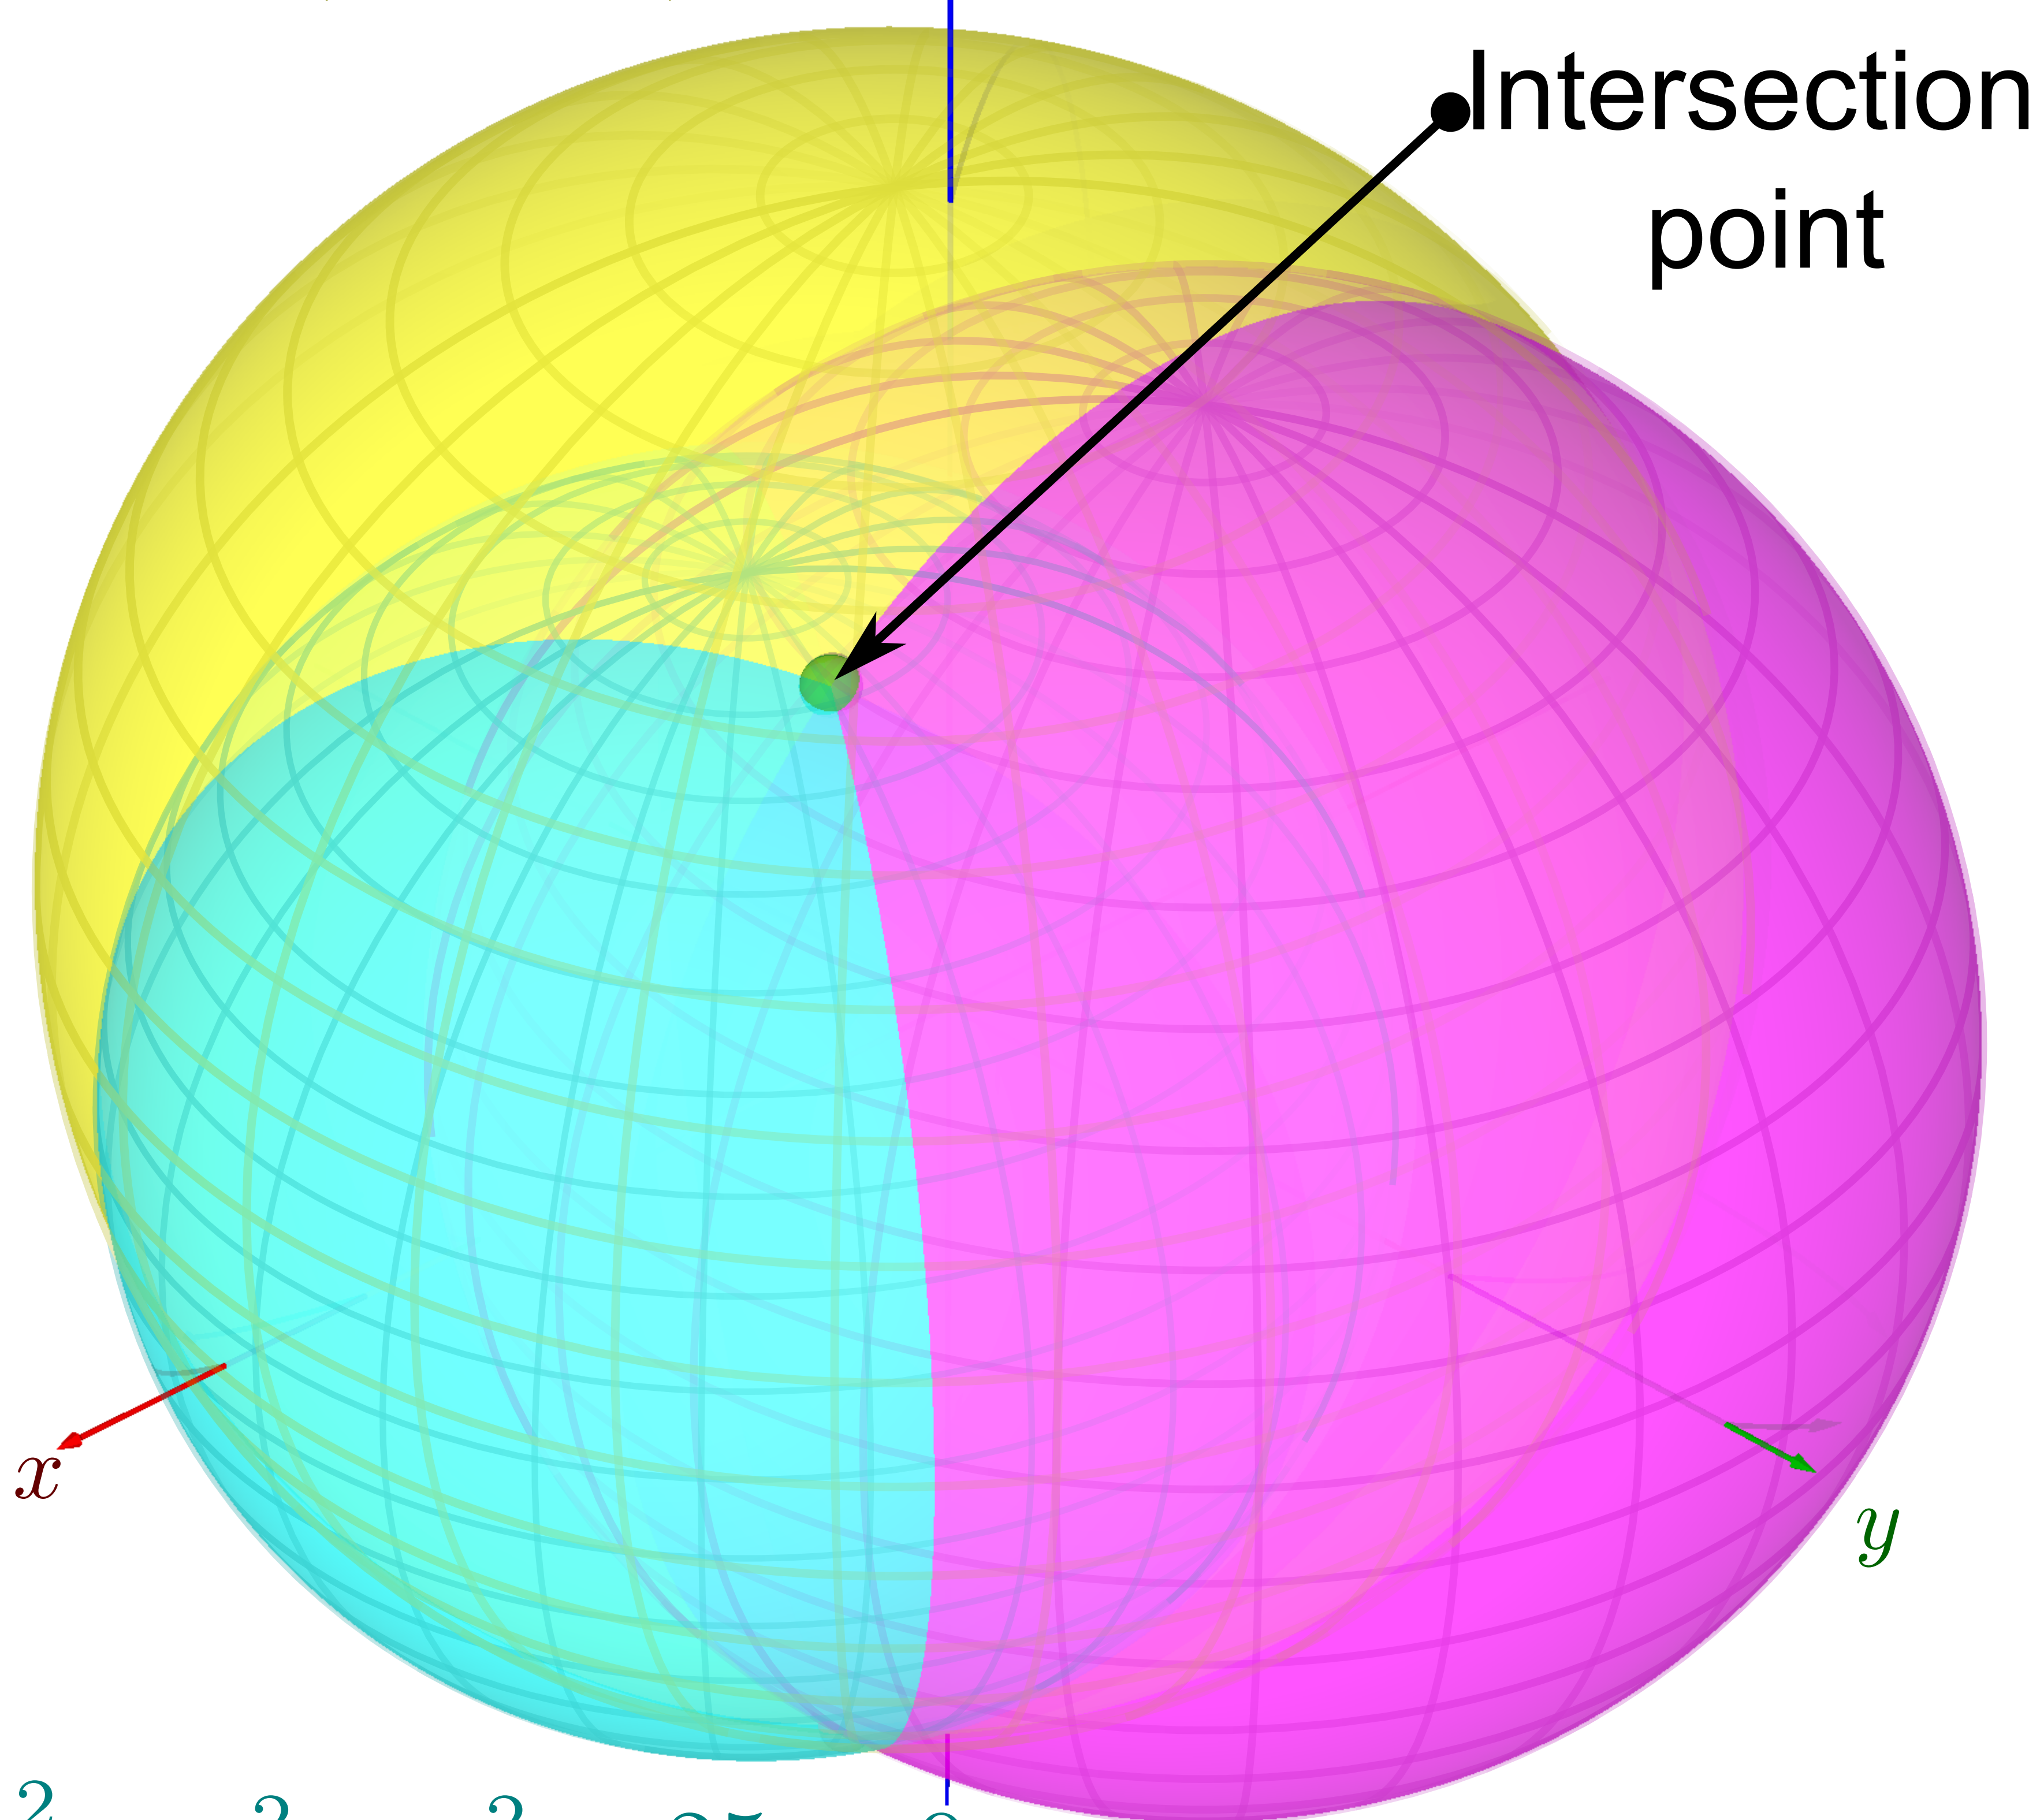

$$(x - 2)^2 + y^2 + z^2 - 25 = 0$$

$$(x + 1)^2 + (y - \sqrt{3})^2 + z^2 - 36 = 0$$

Supplement: s1 [file s1]

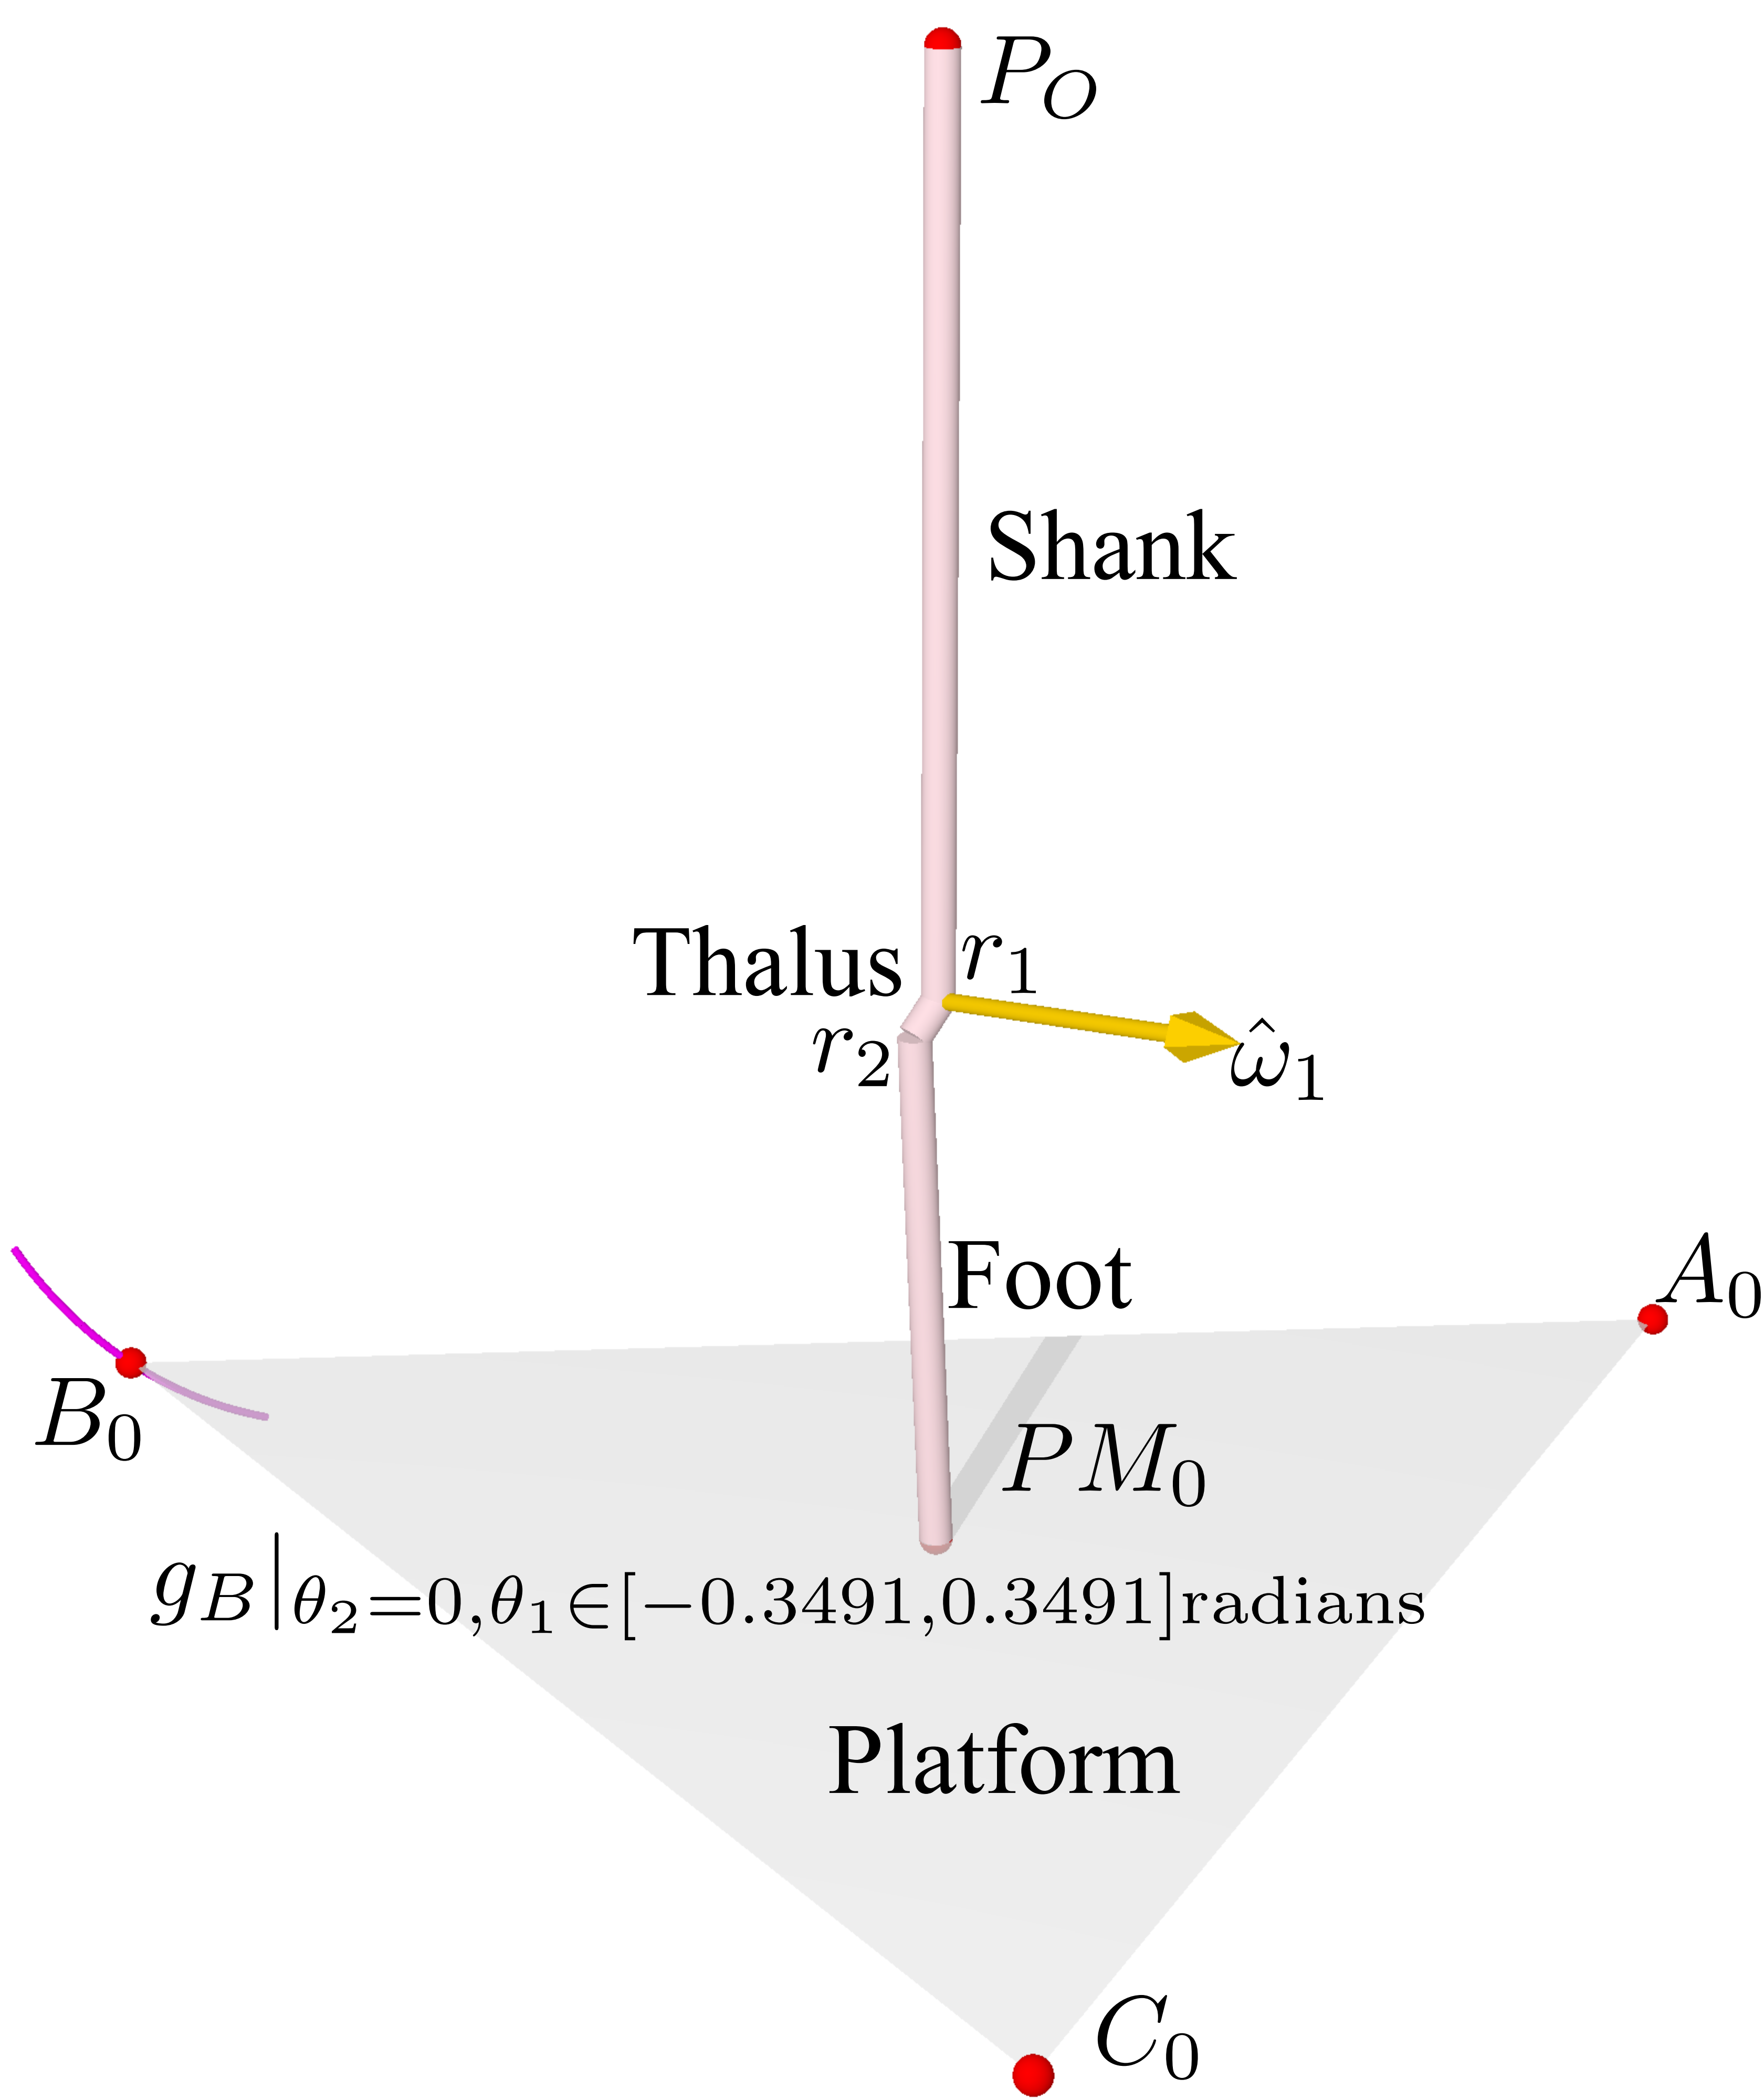

Supplement: s1 [file s1]

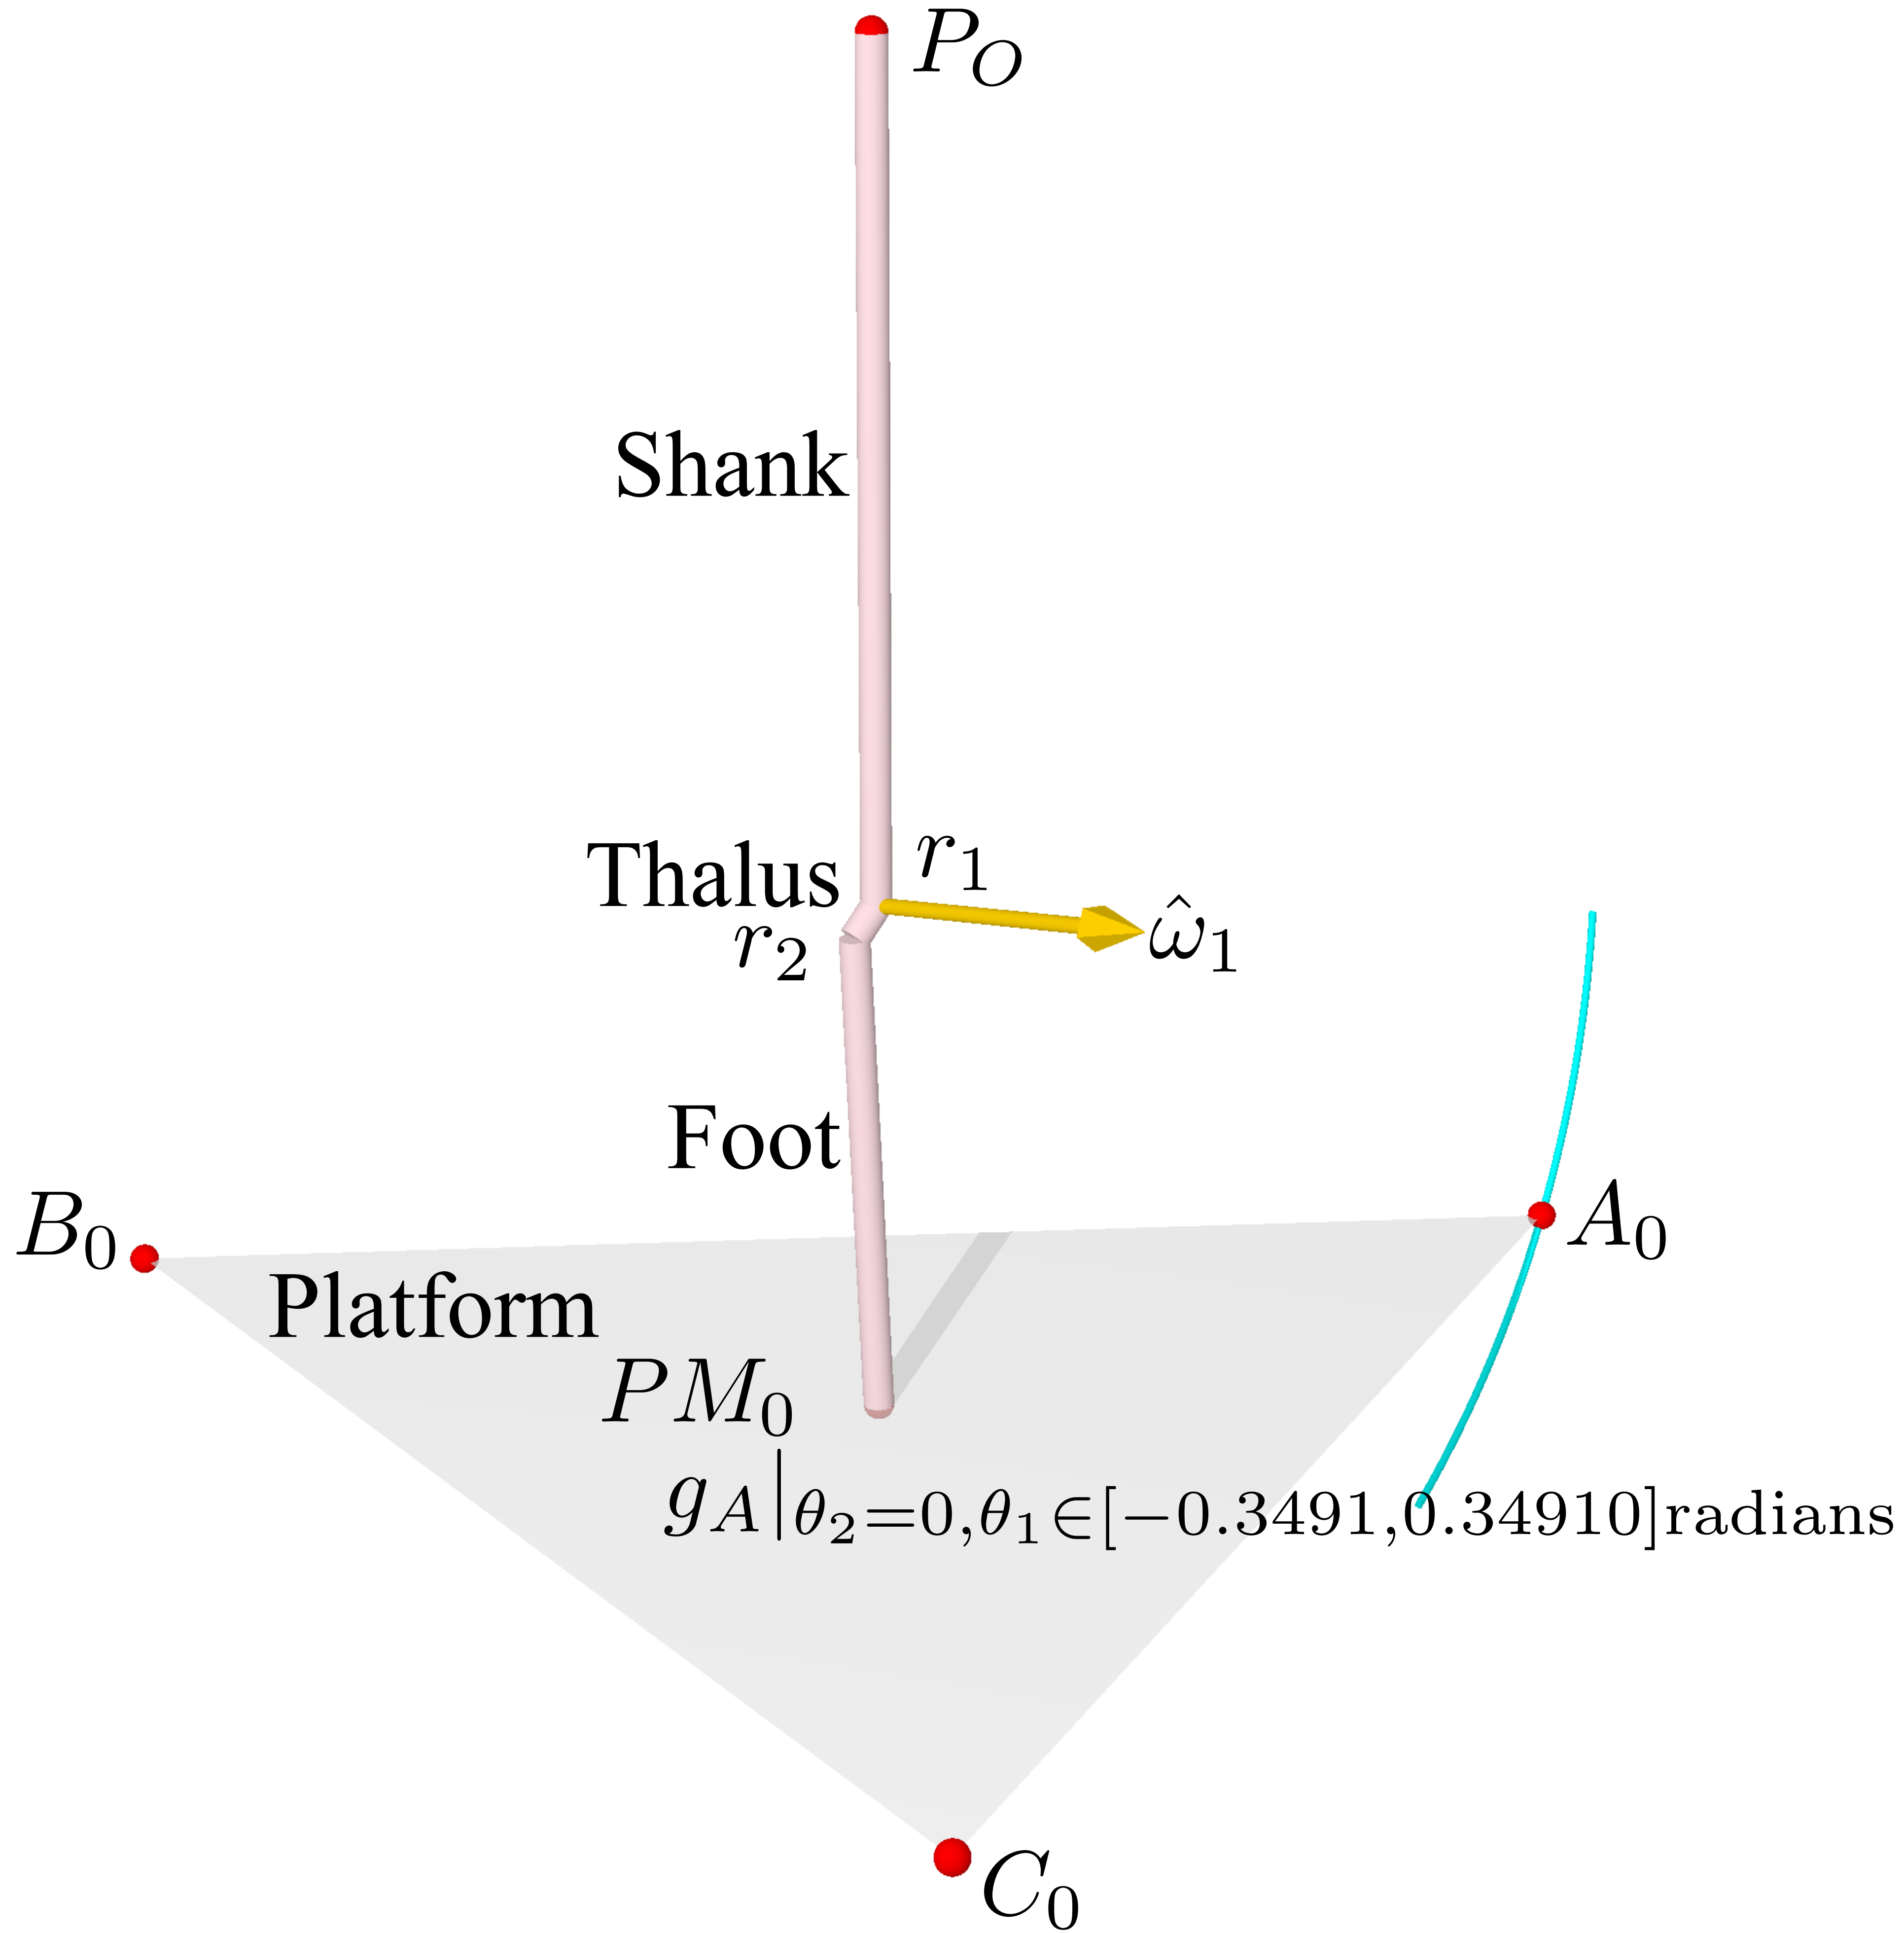

Supplement: s1 [file s1]

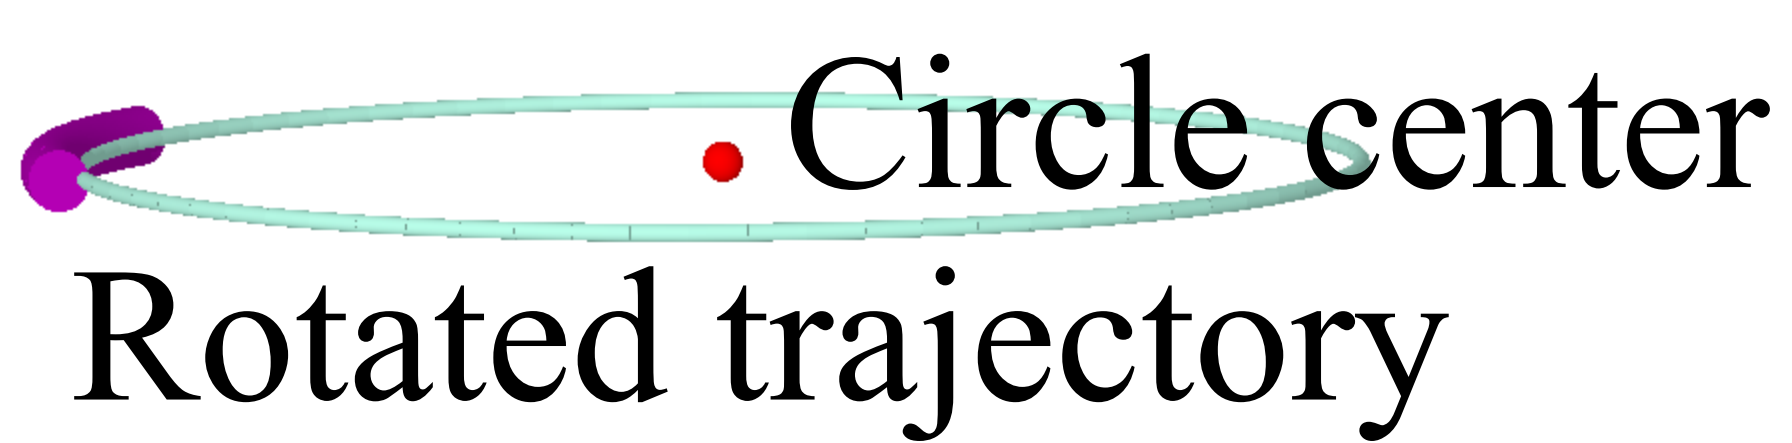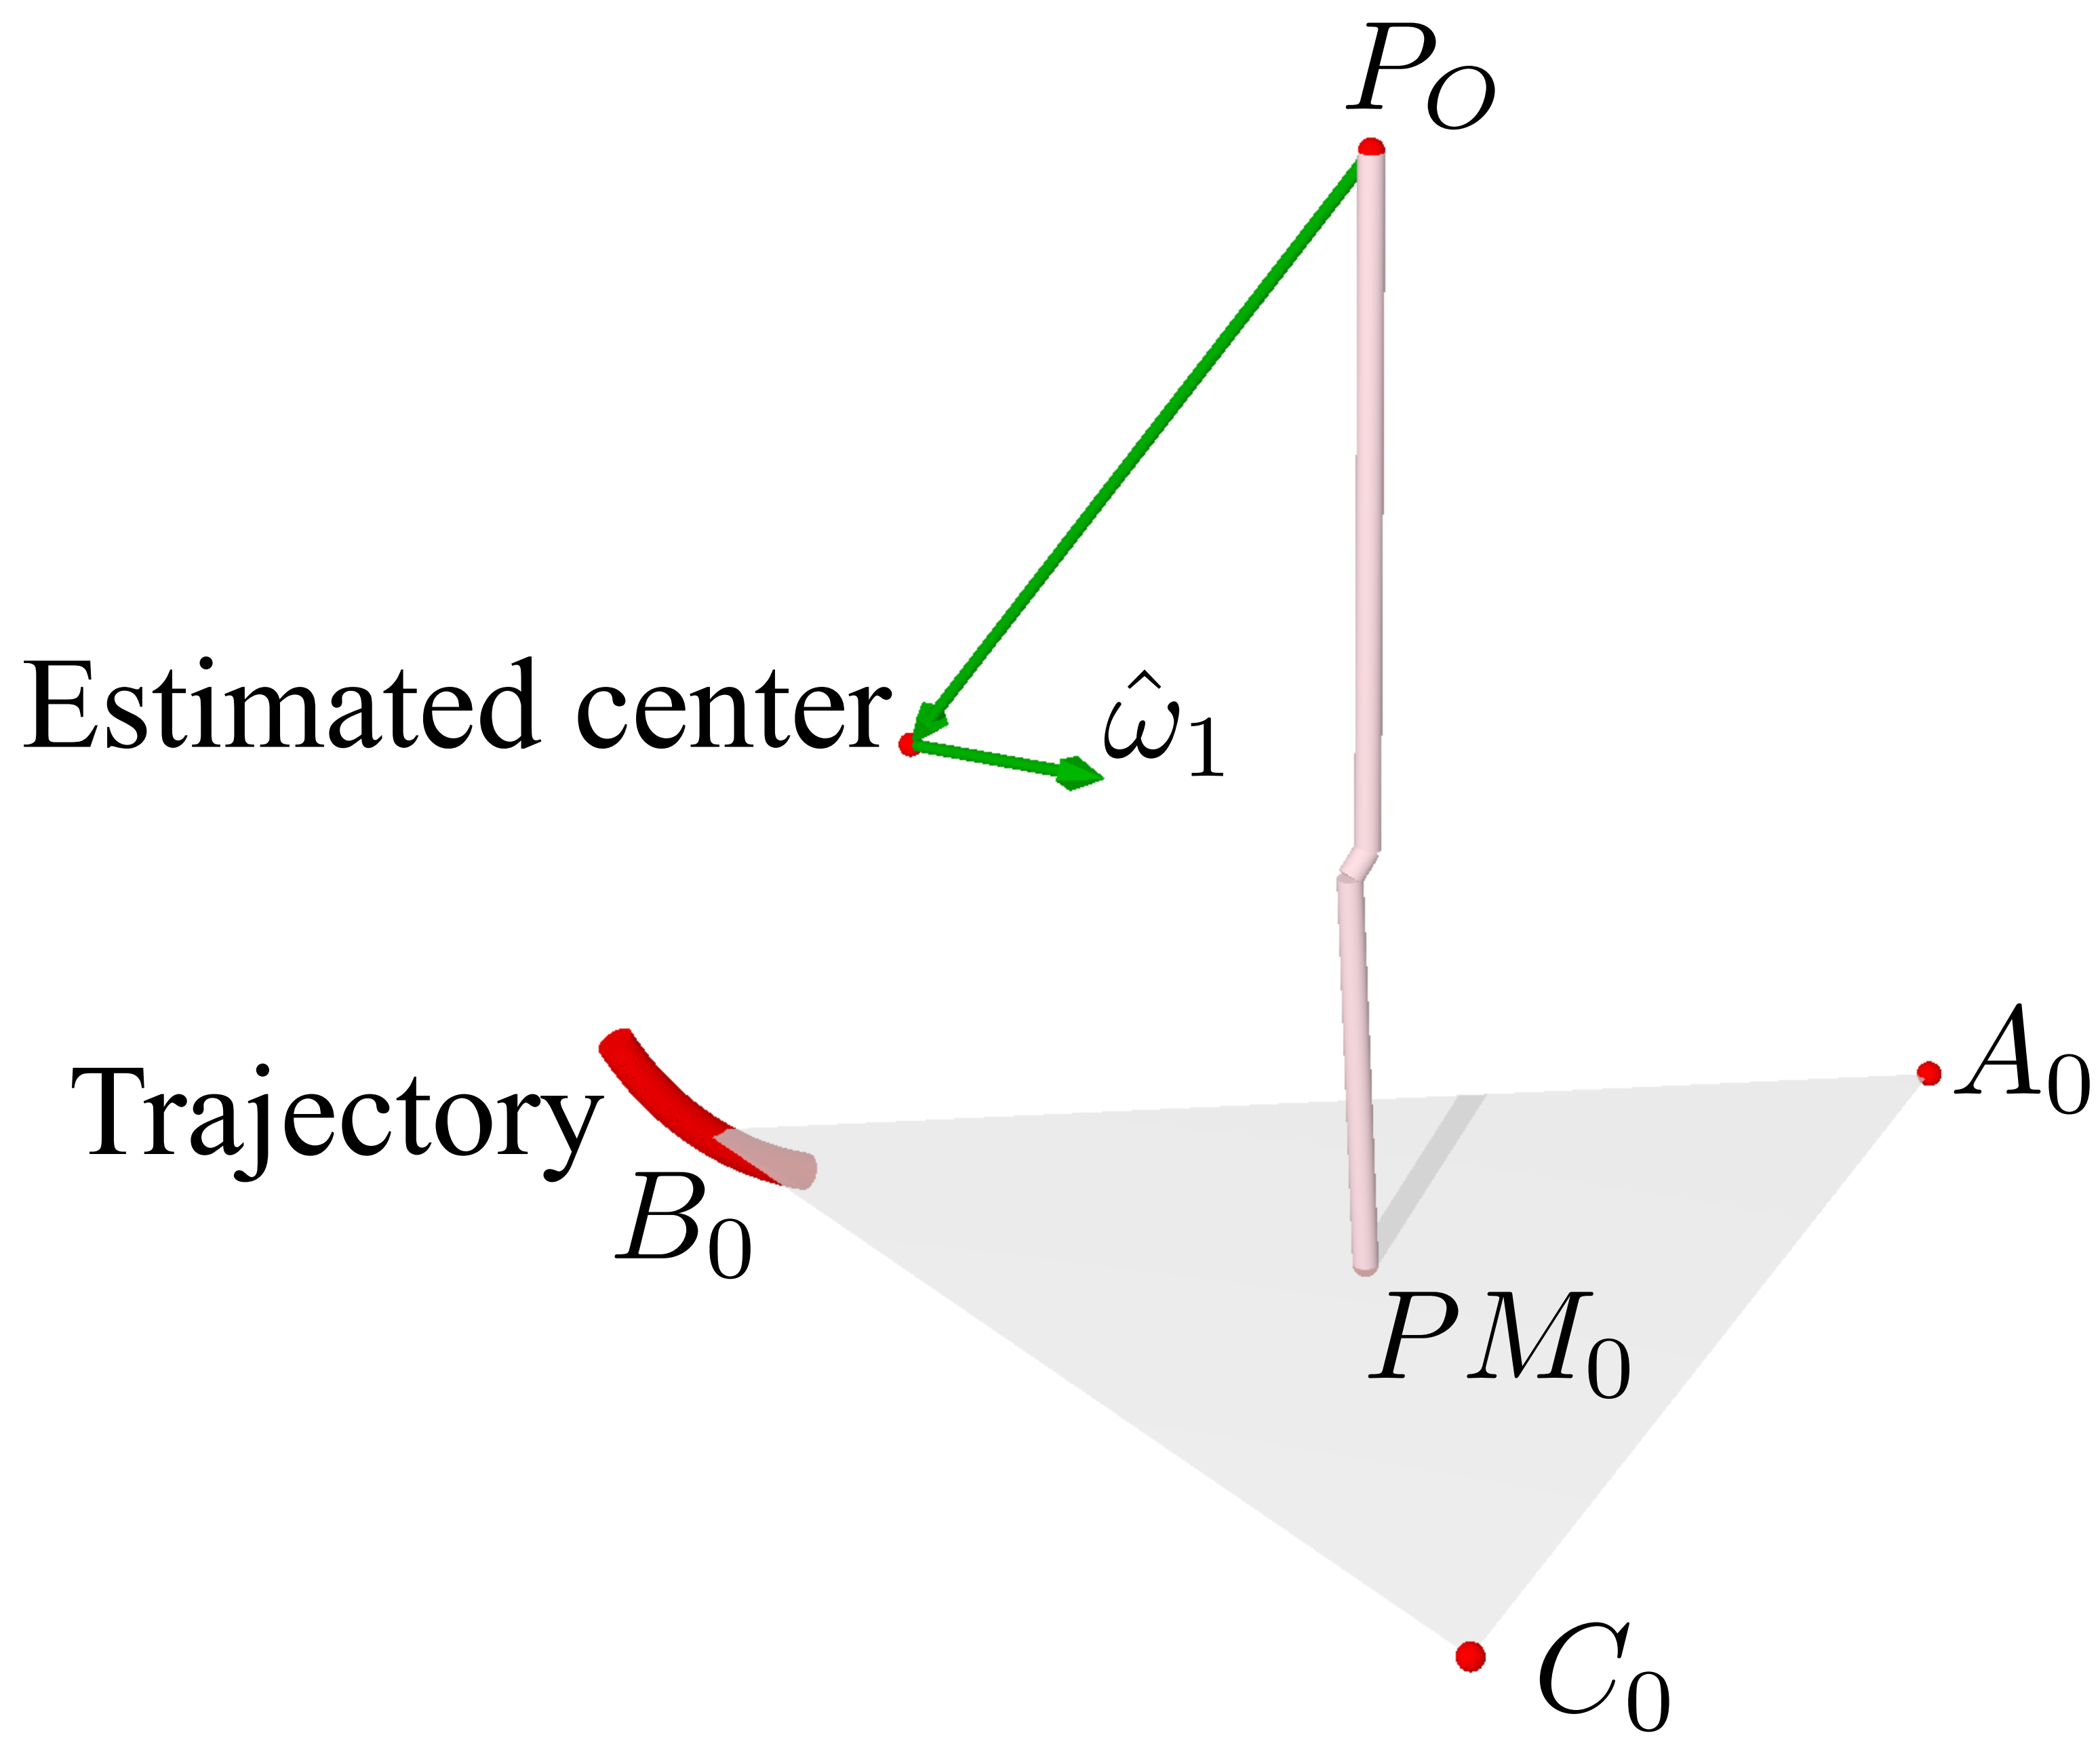

Supplement: s1 [file s1]

Sensor module B

Sensor module A

Base triangles

Platform

Sensor module C

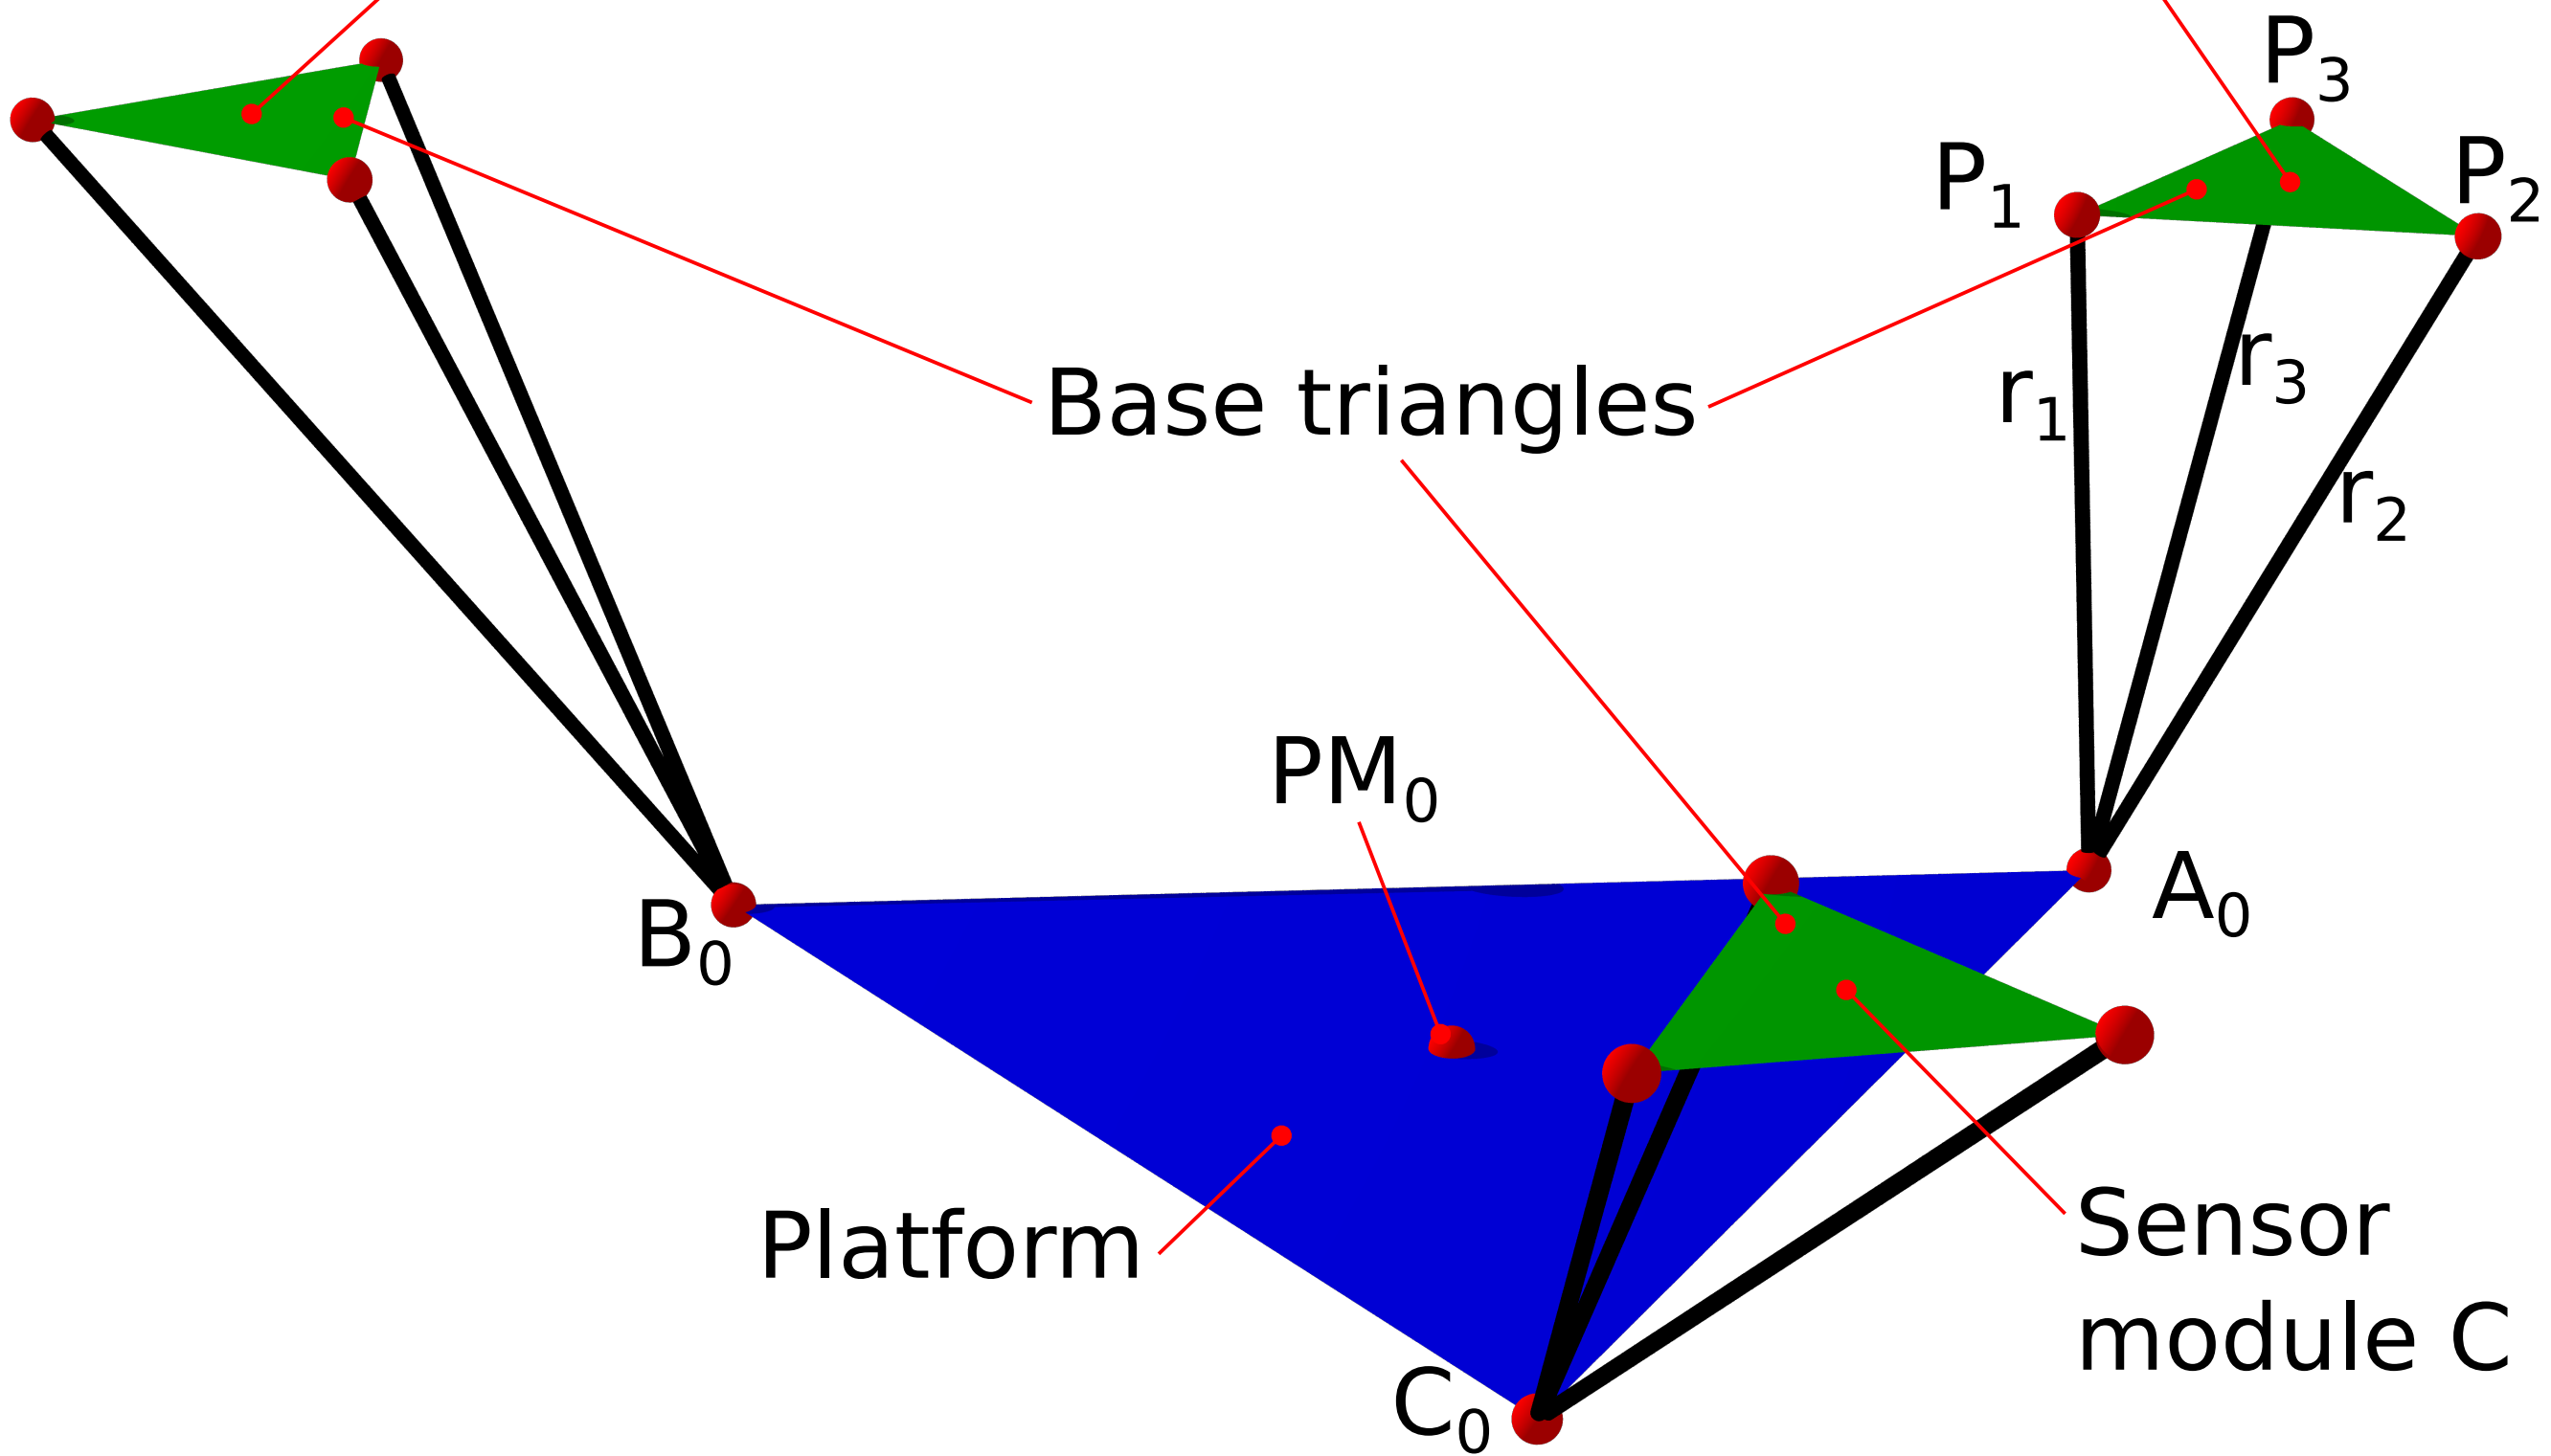

Supplement: s1 [file s1]

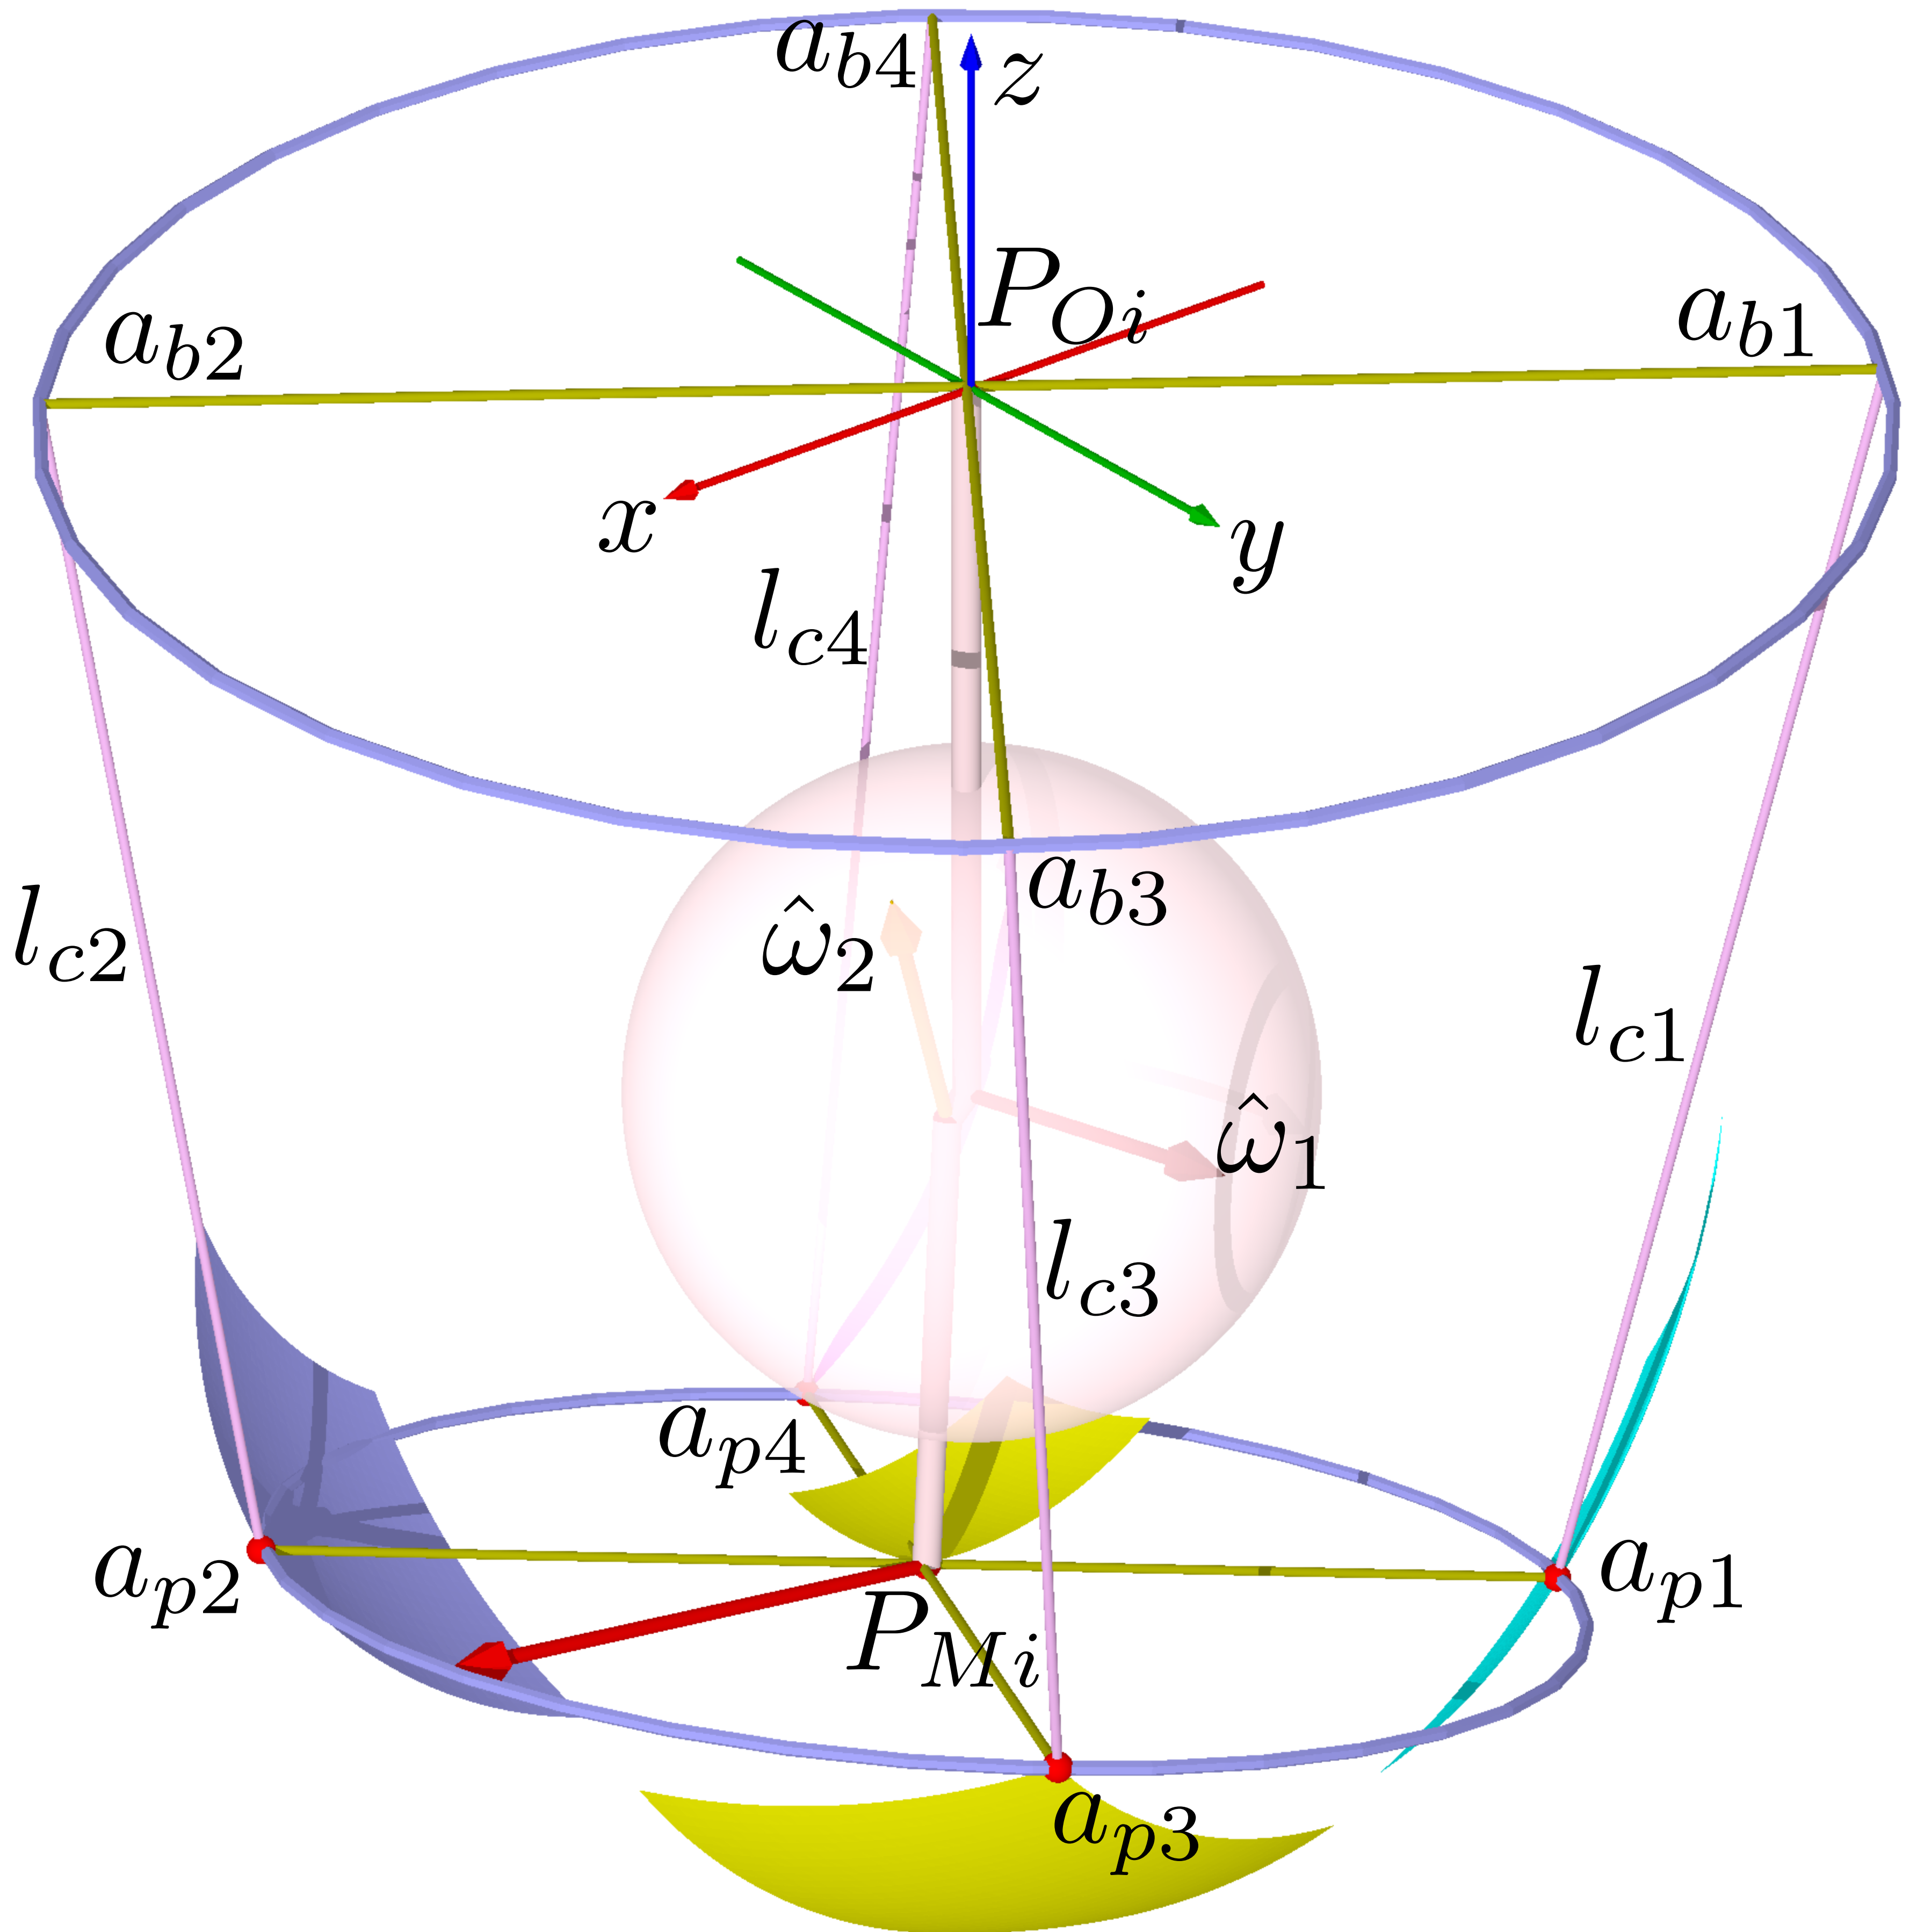

Supplement: s1 [file s1]

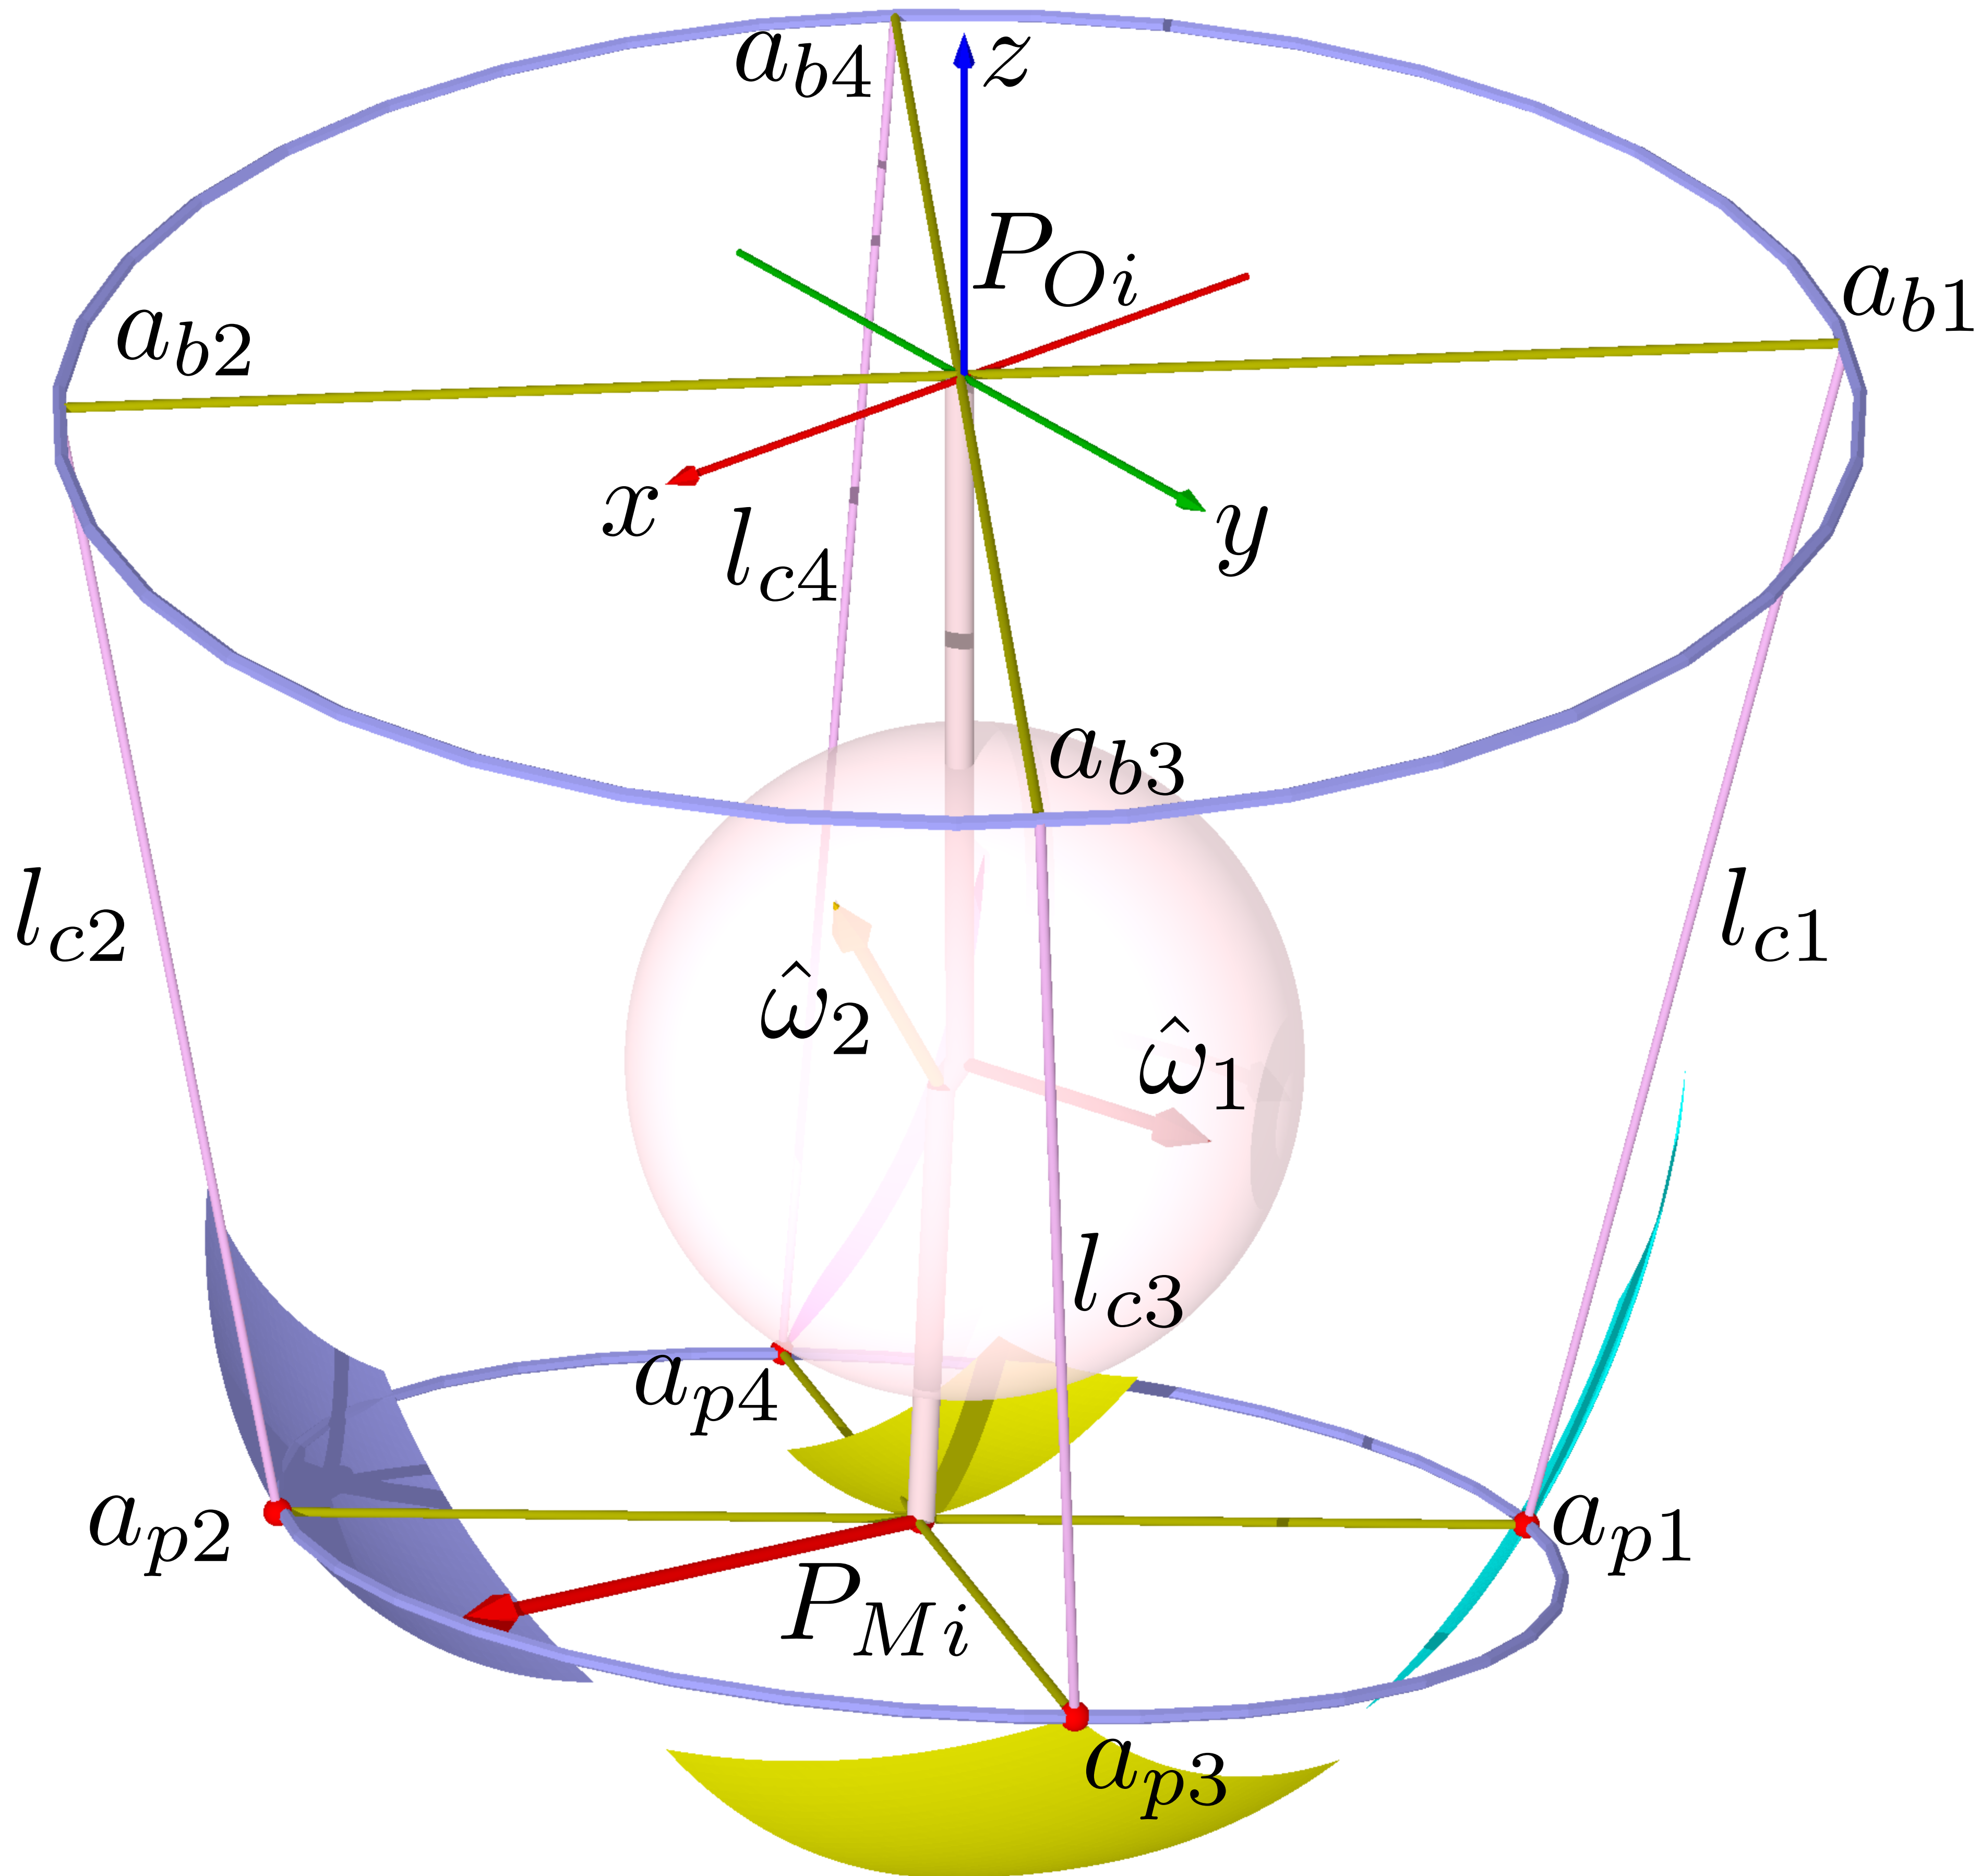

Supplement: s1 [file s1]

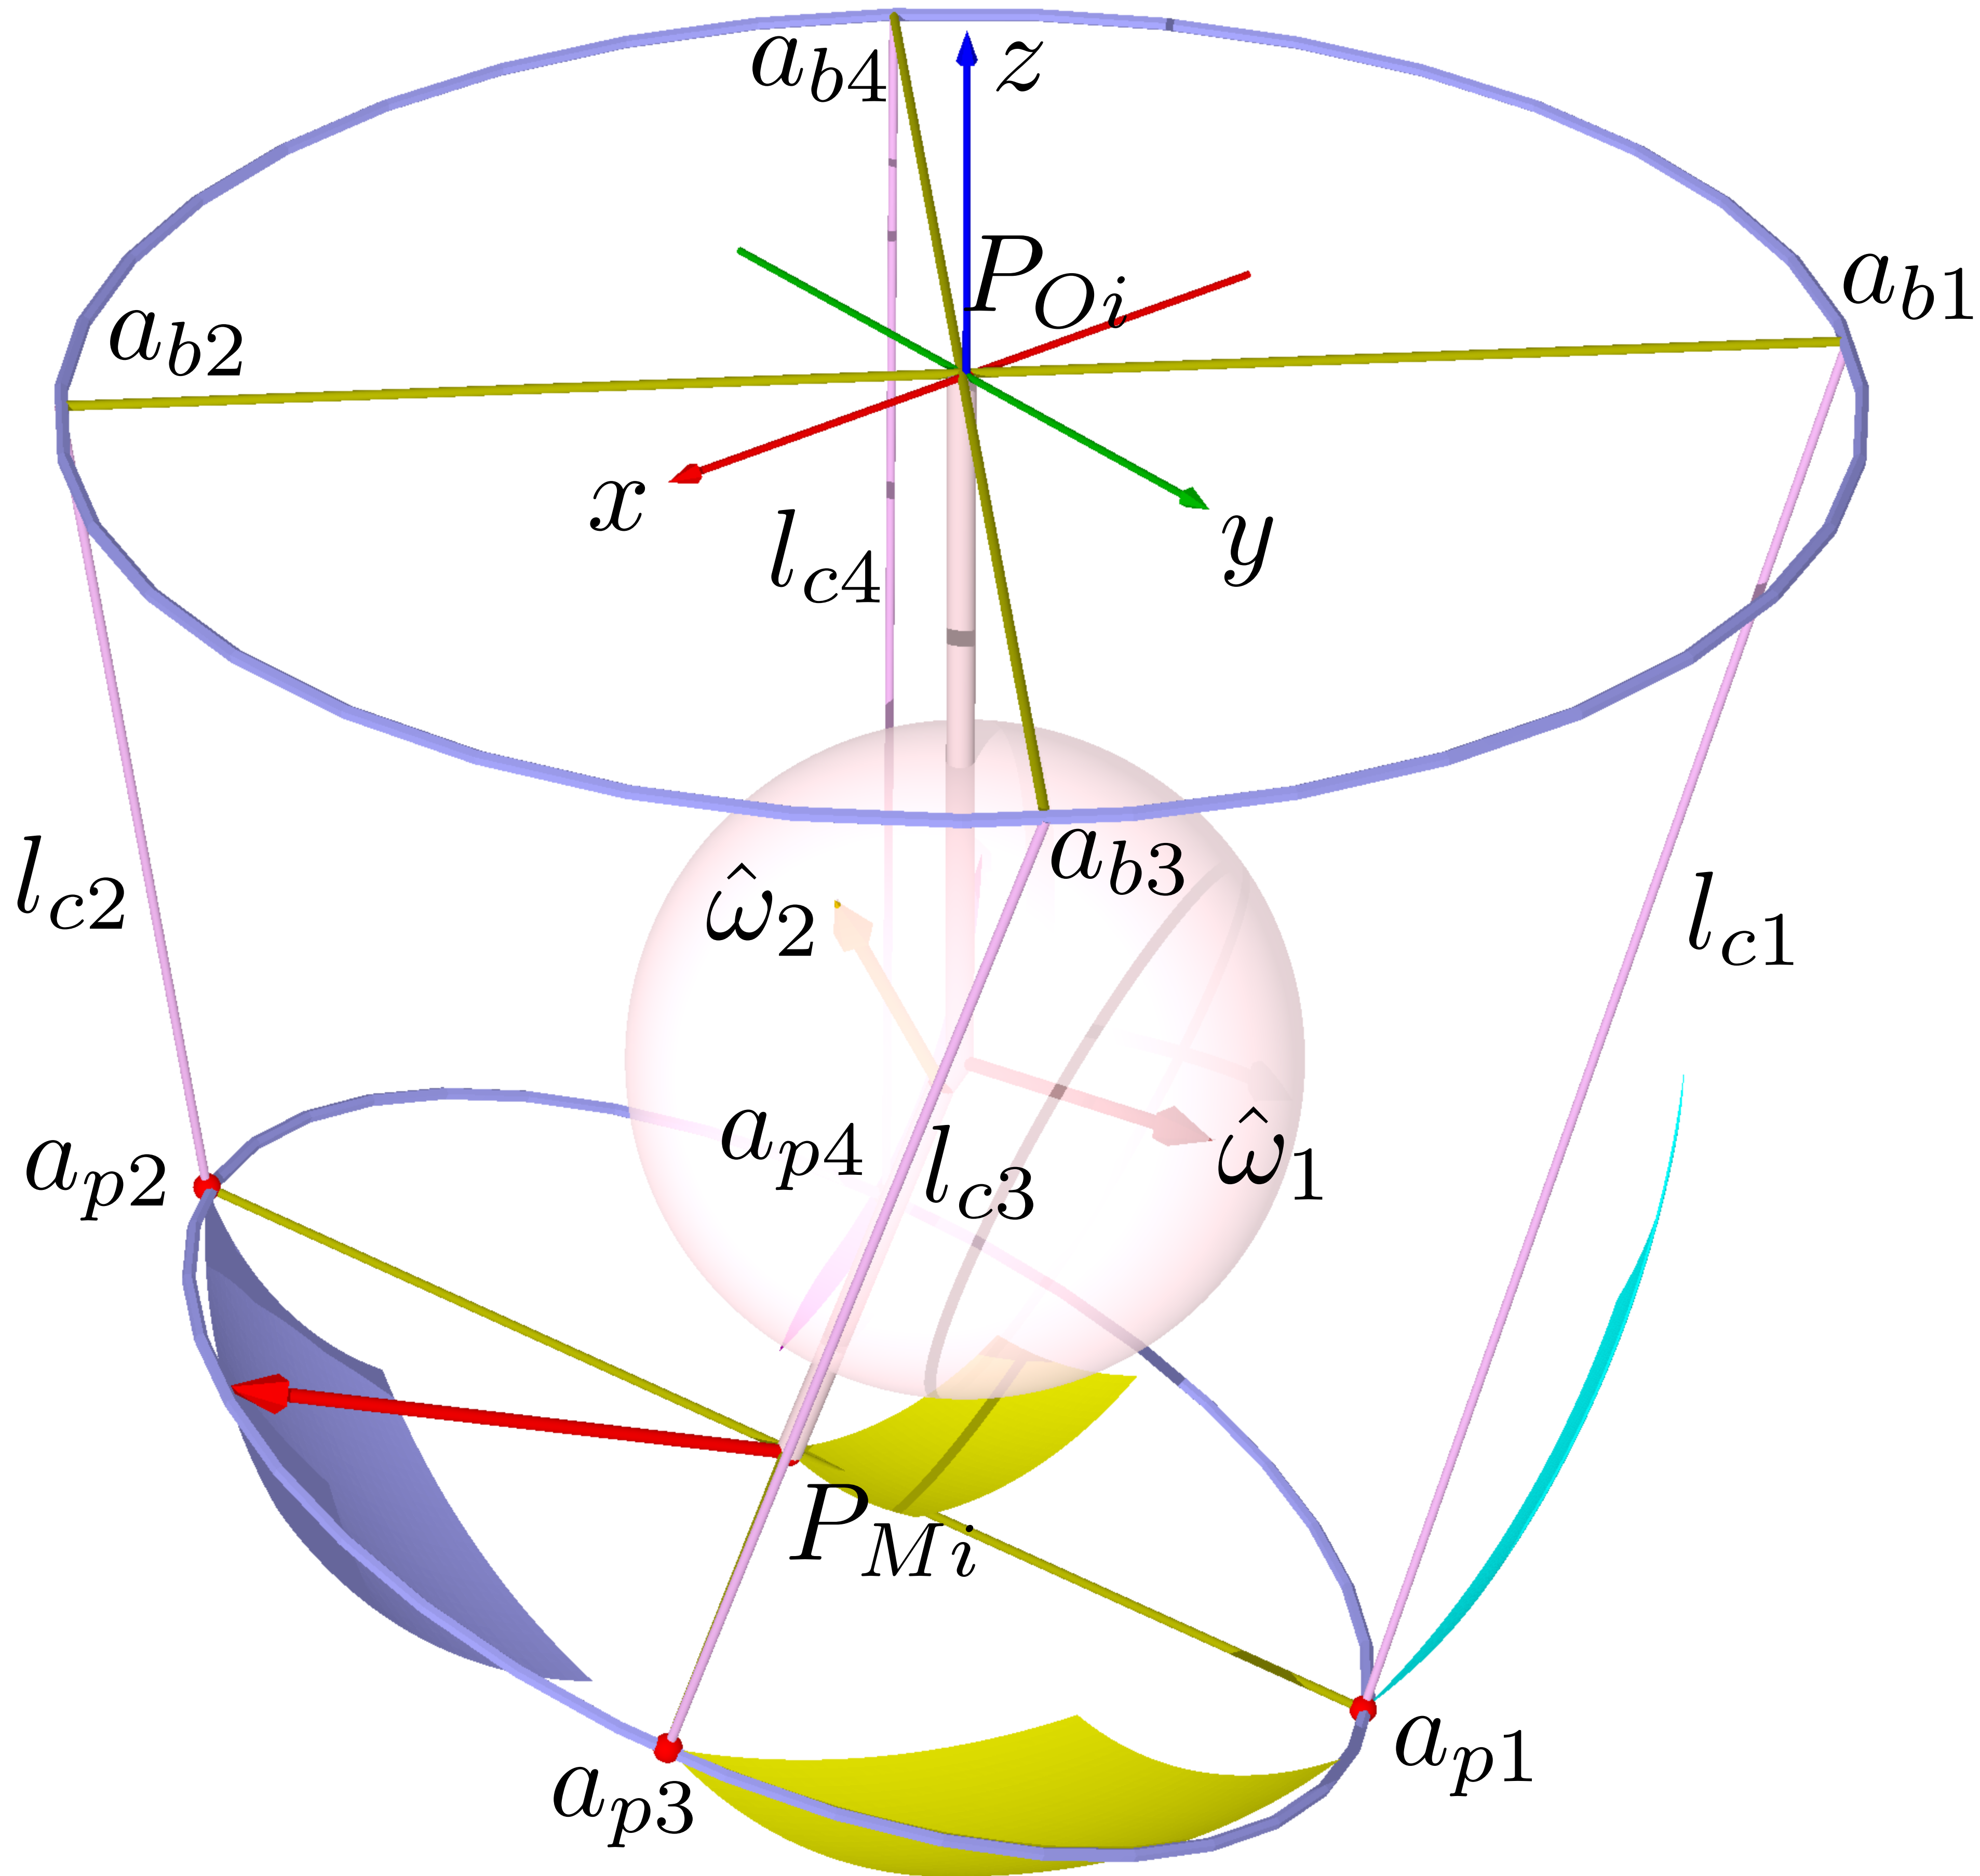

Supplement: s1 [file s1]

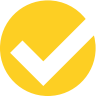

check for  
updates

Supplement: s1 [file s1]

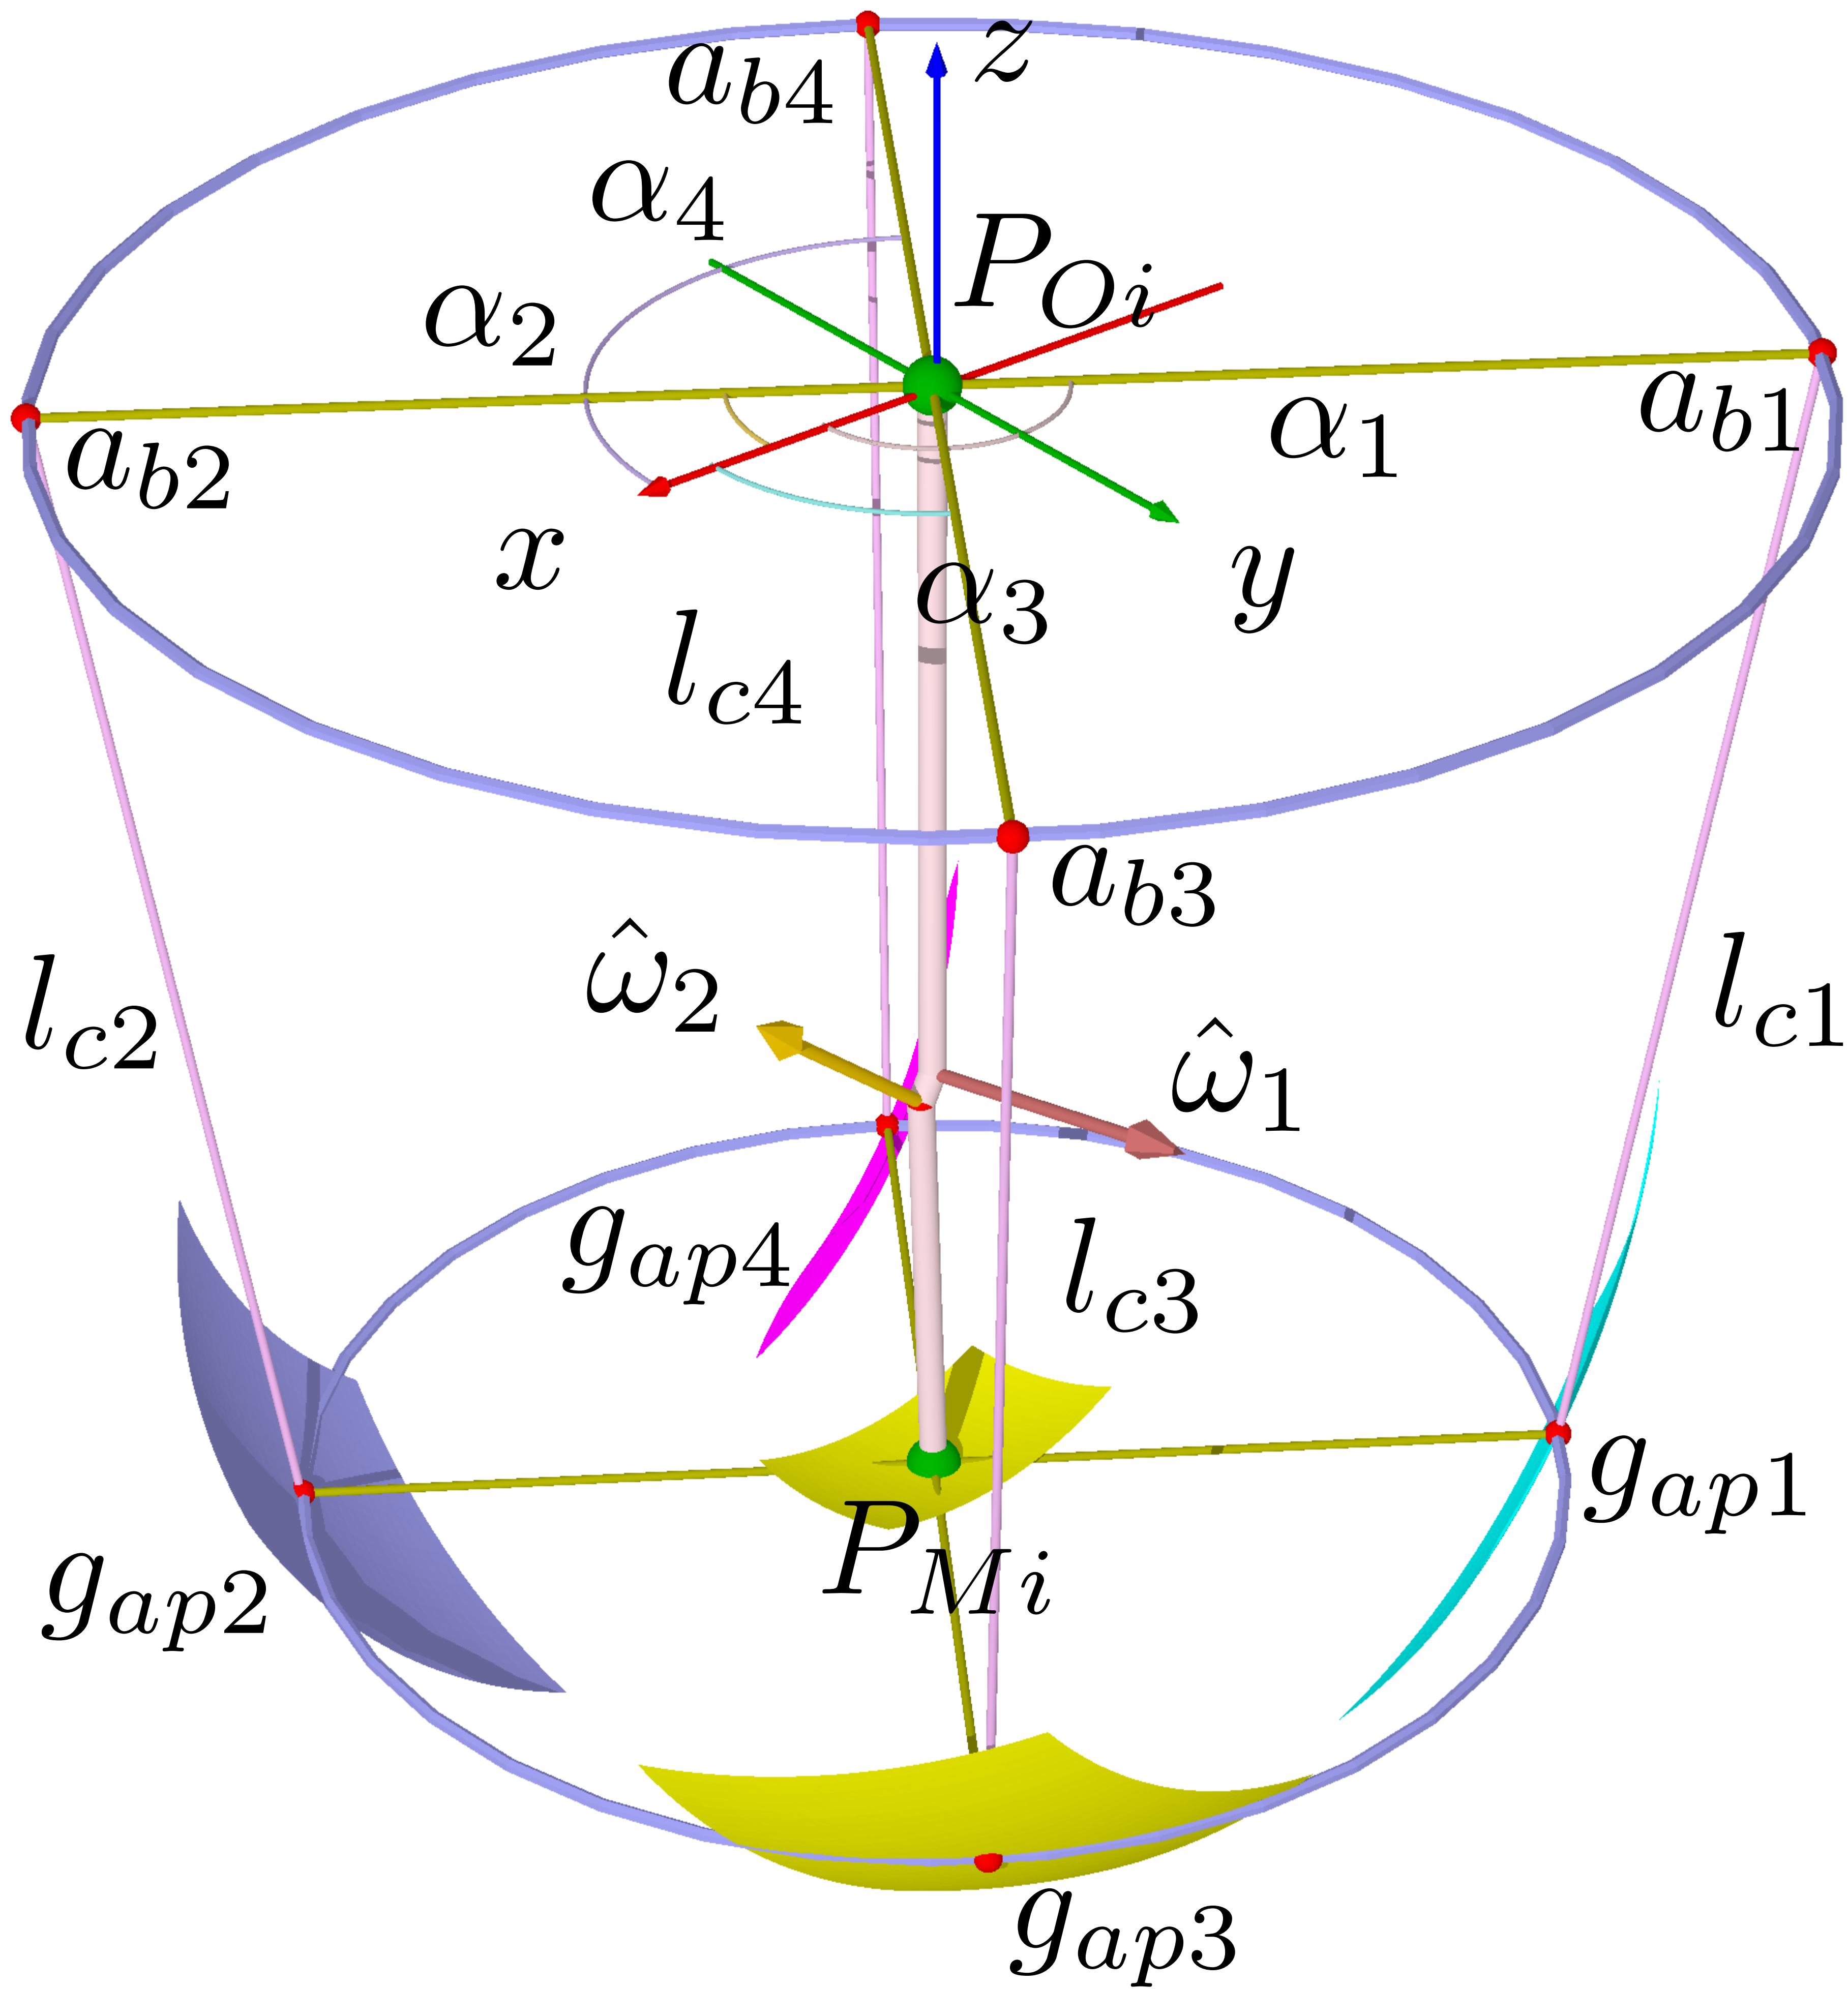

Supplement: s1 [file s1]

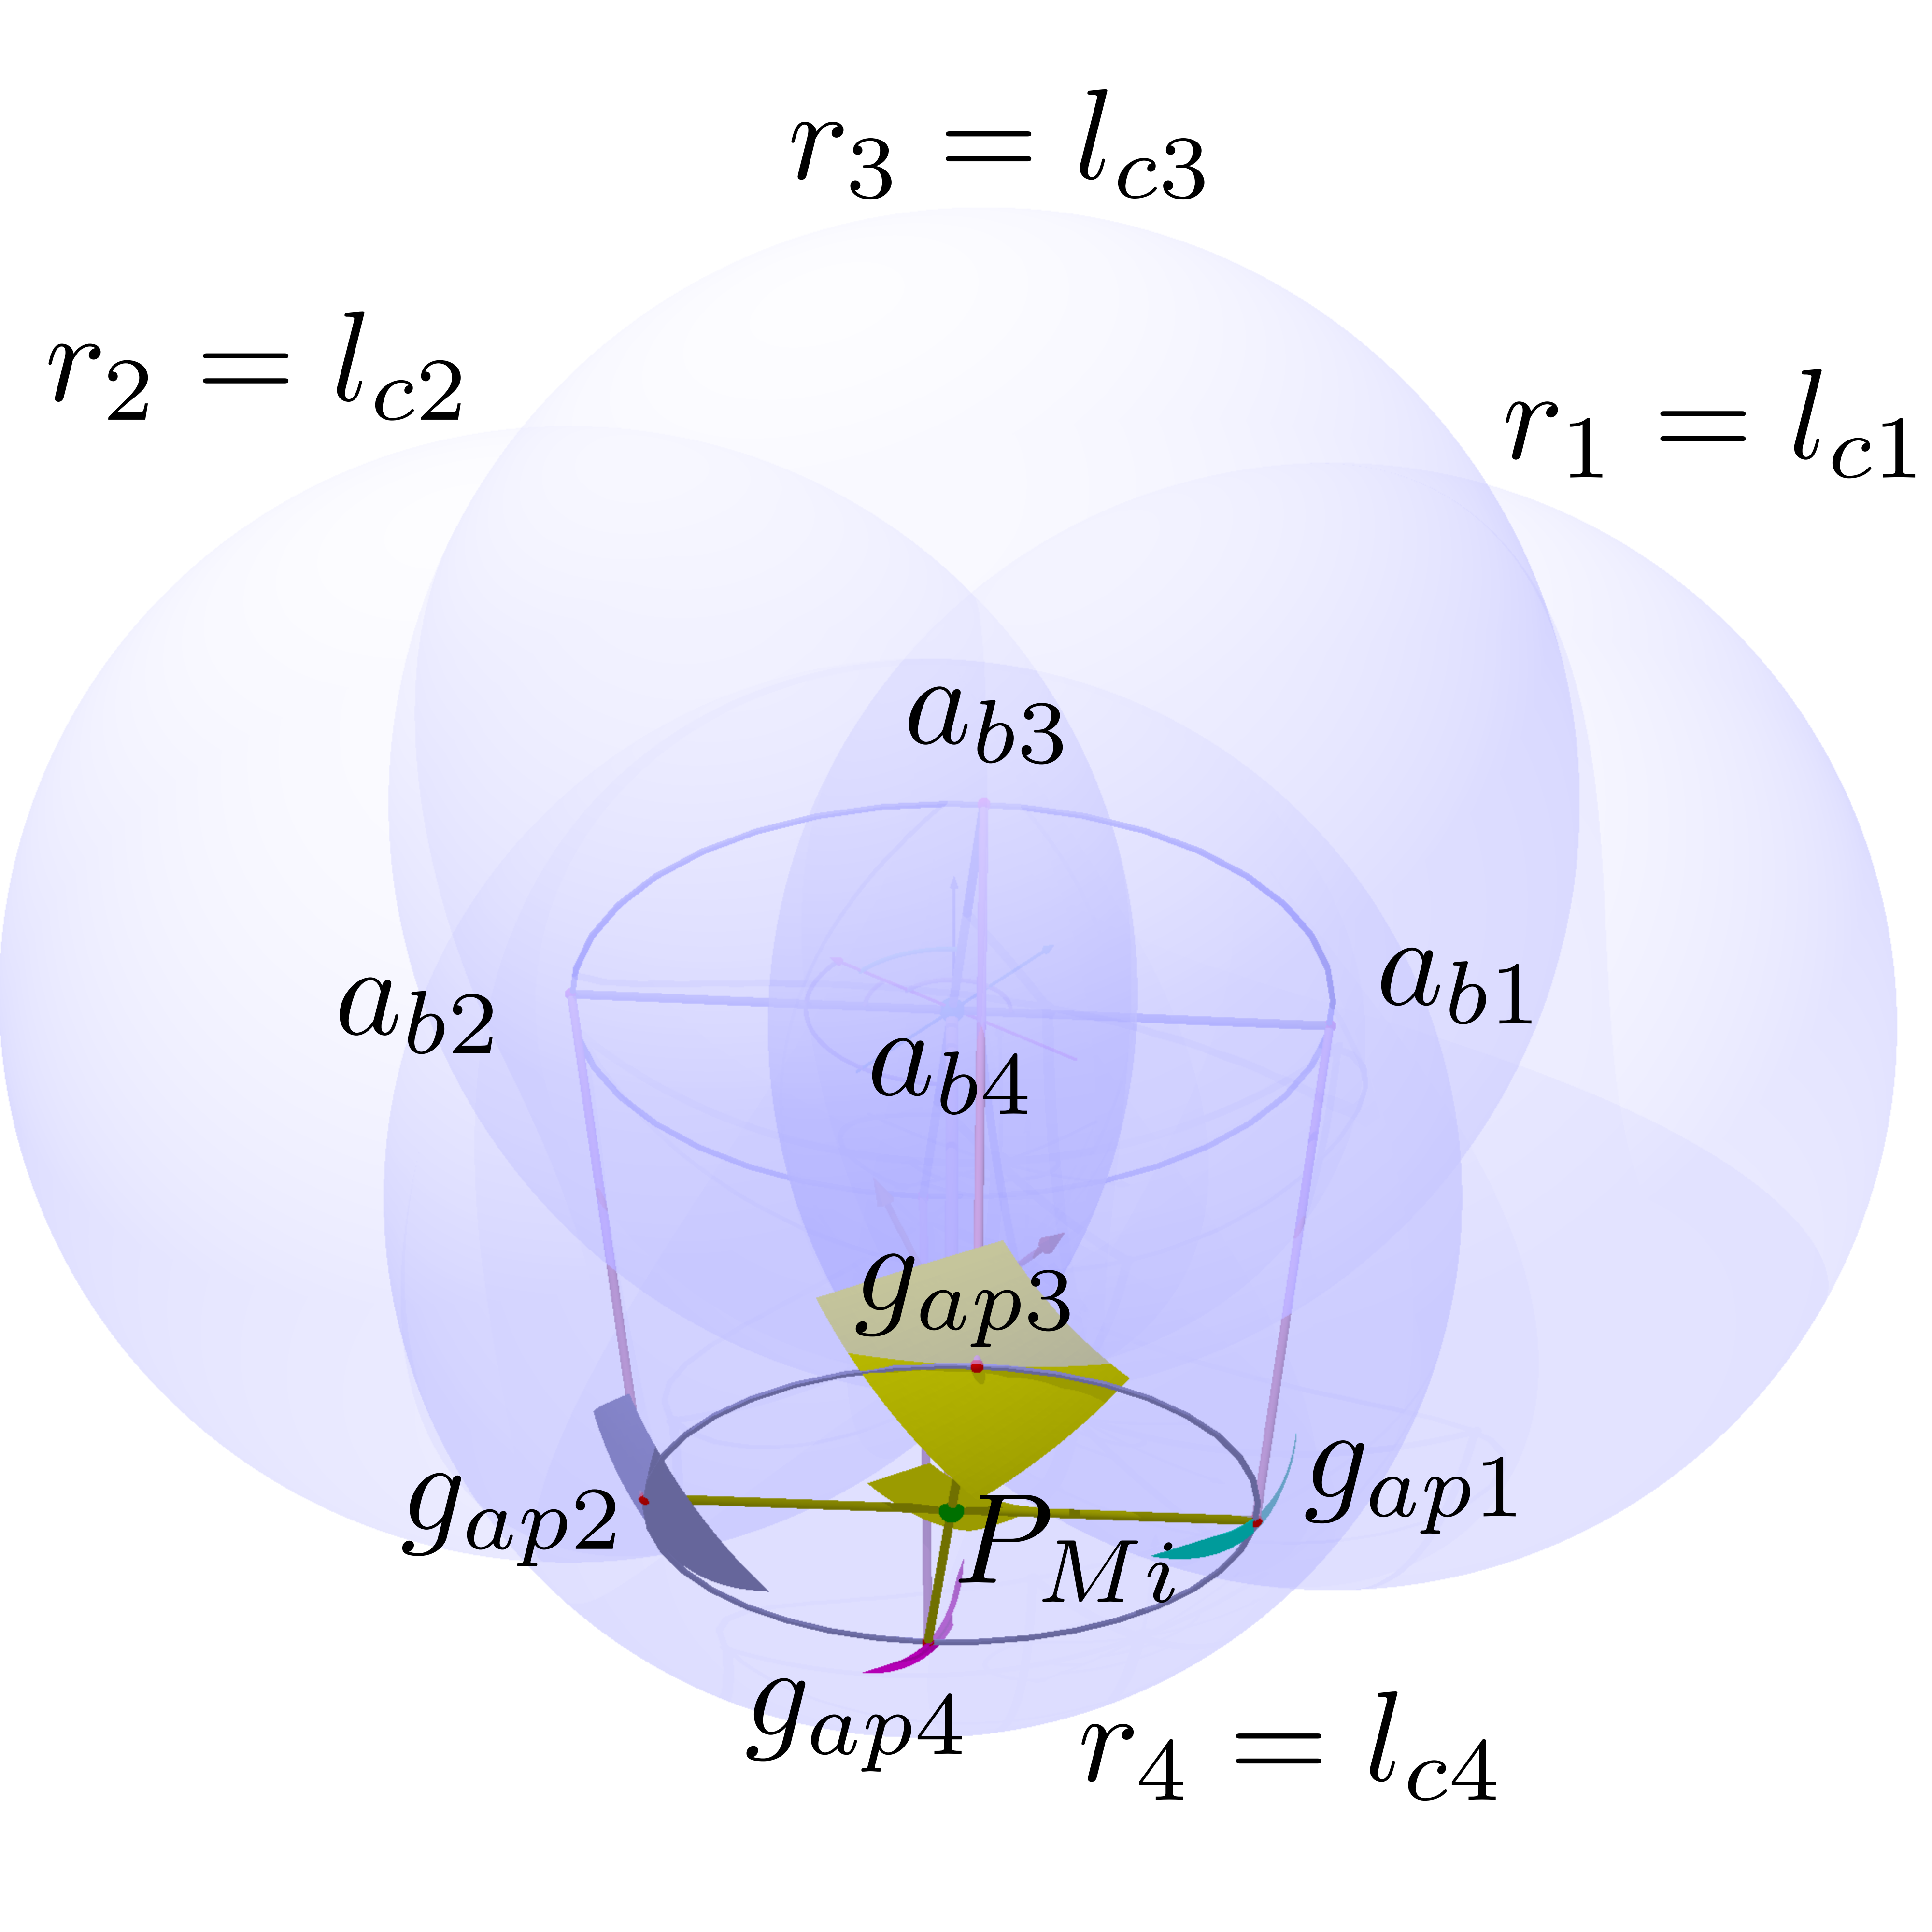

Supplement: s1 [file s1]

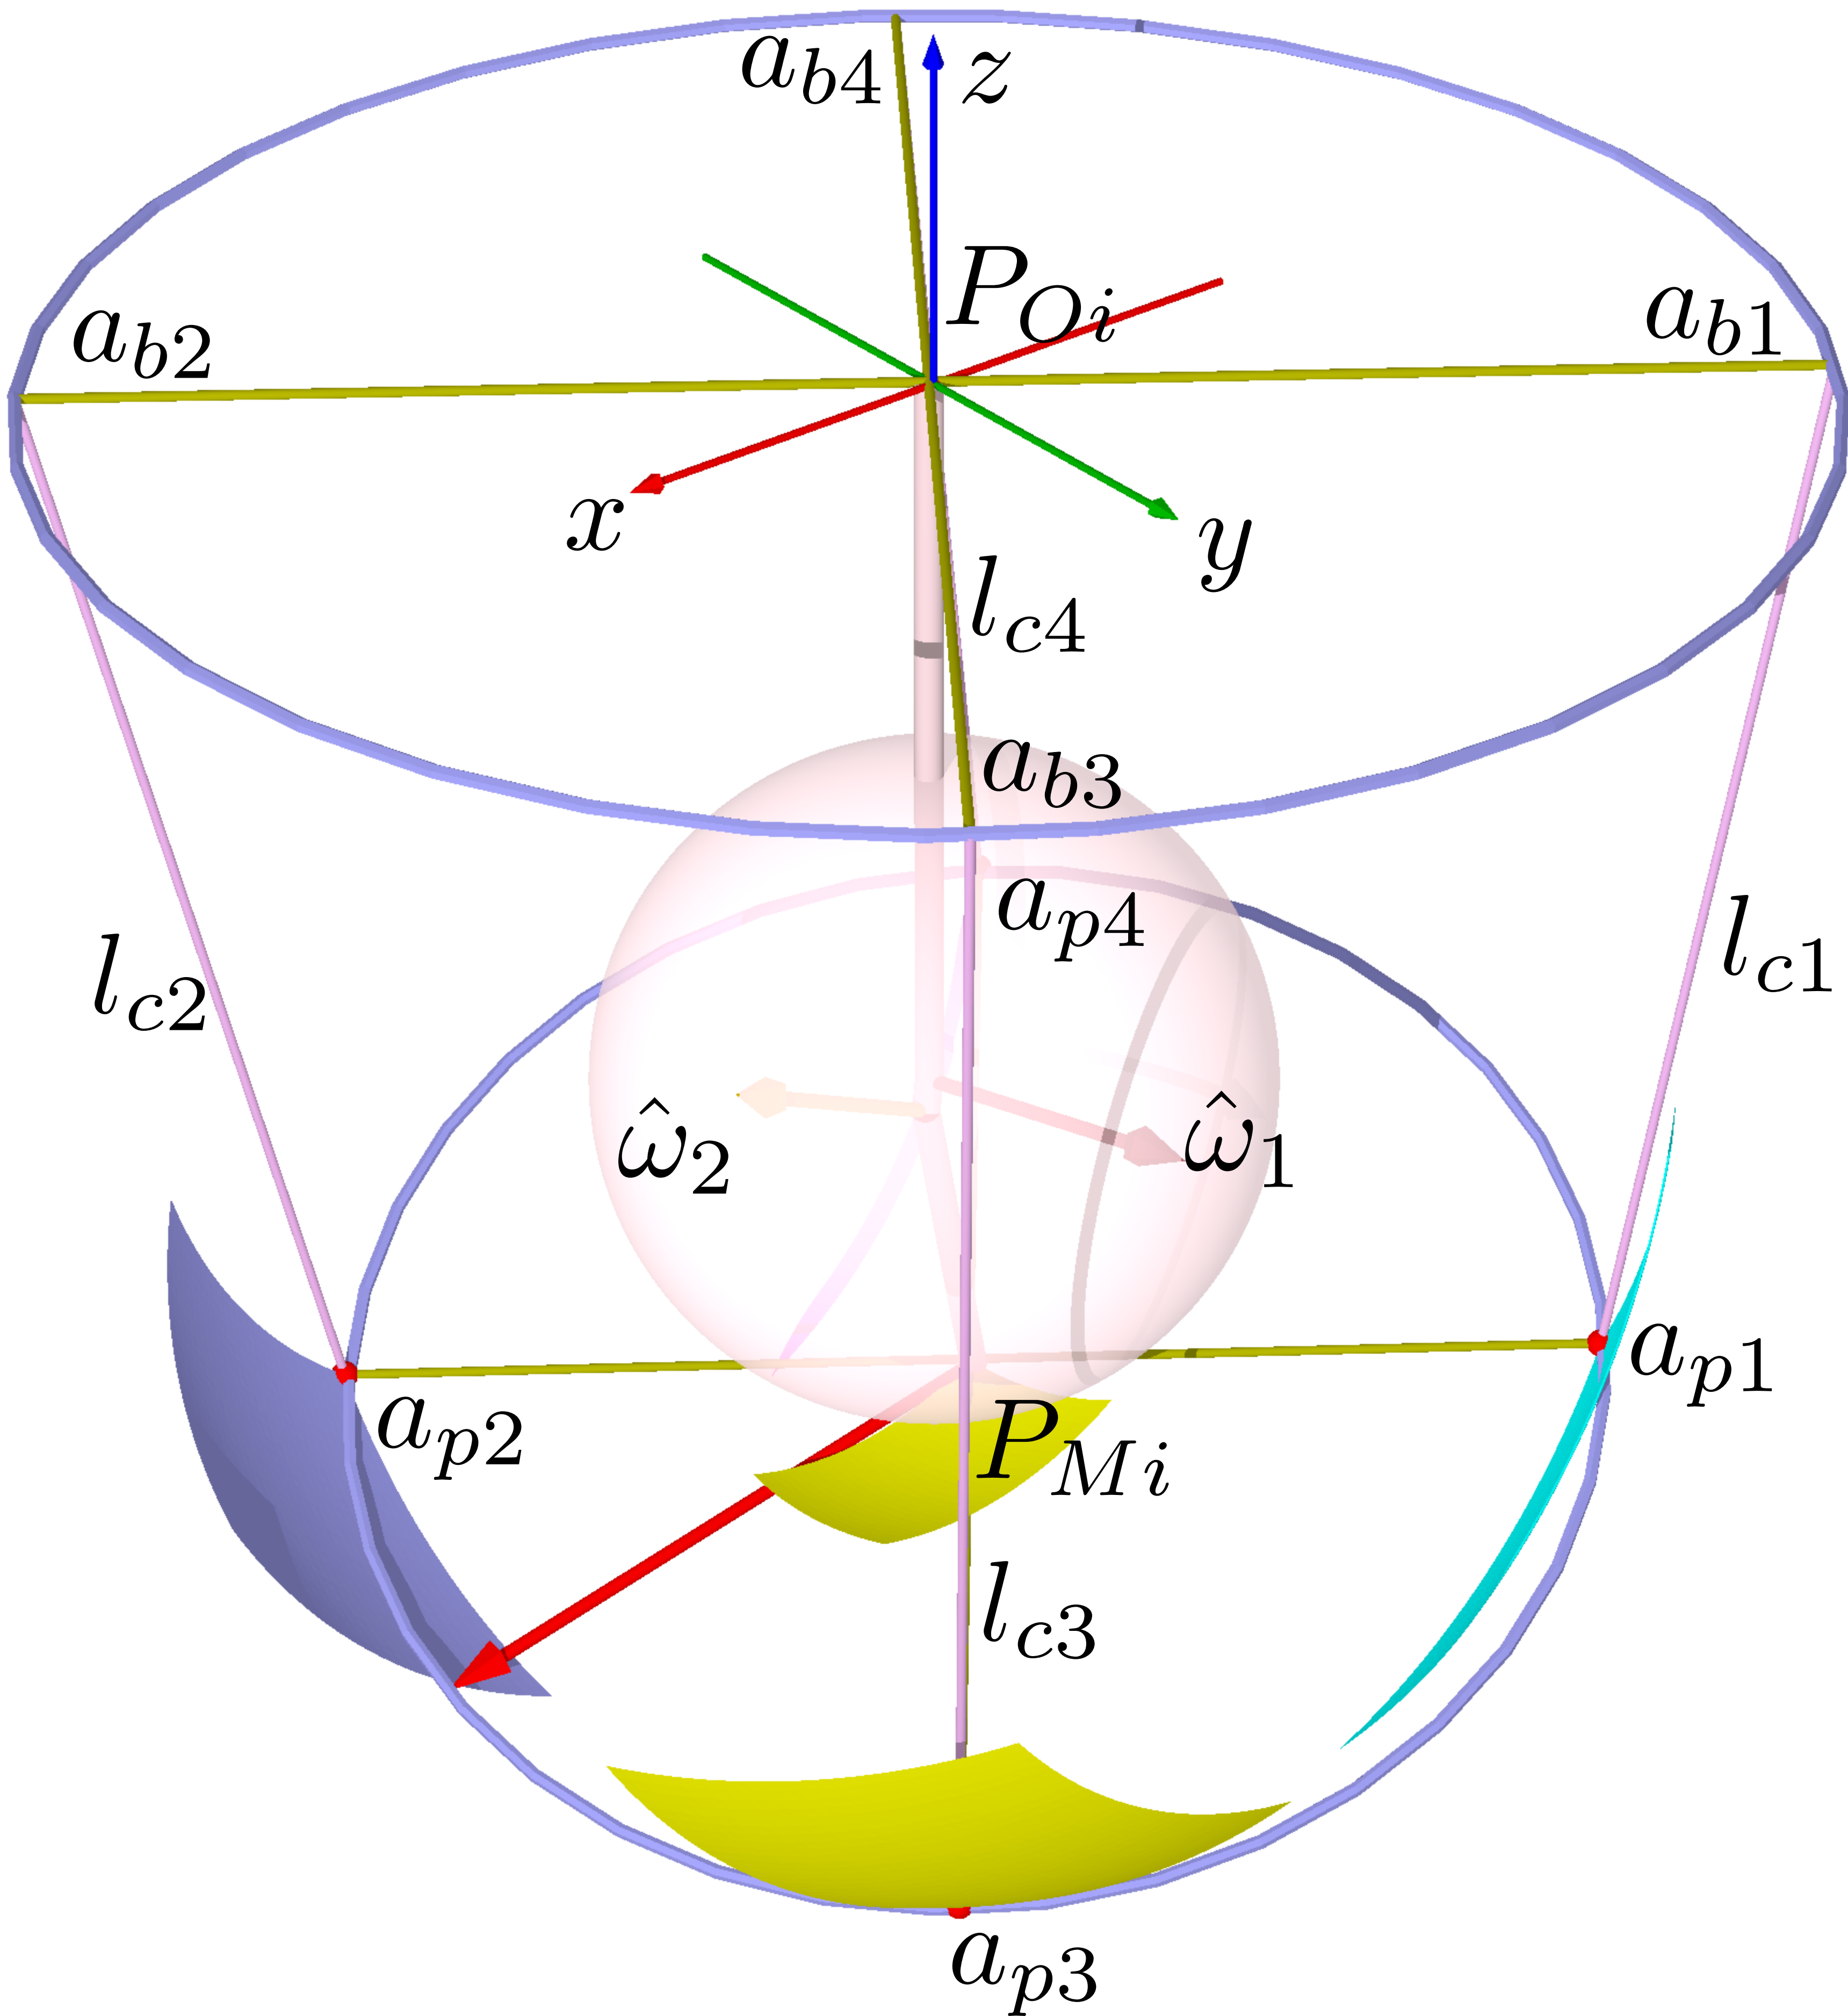

Supplement: s1 [file s1]

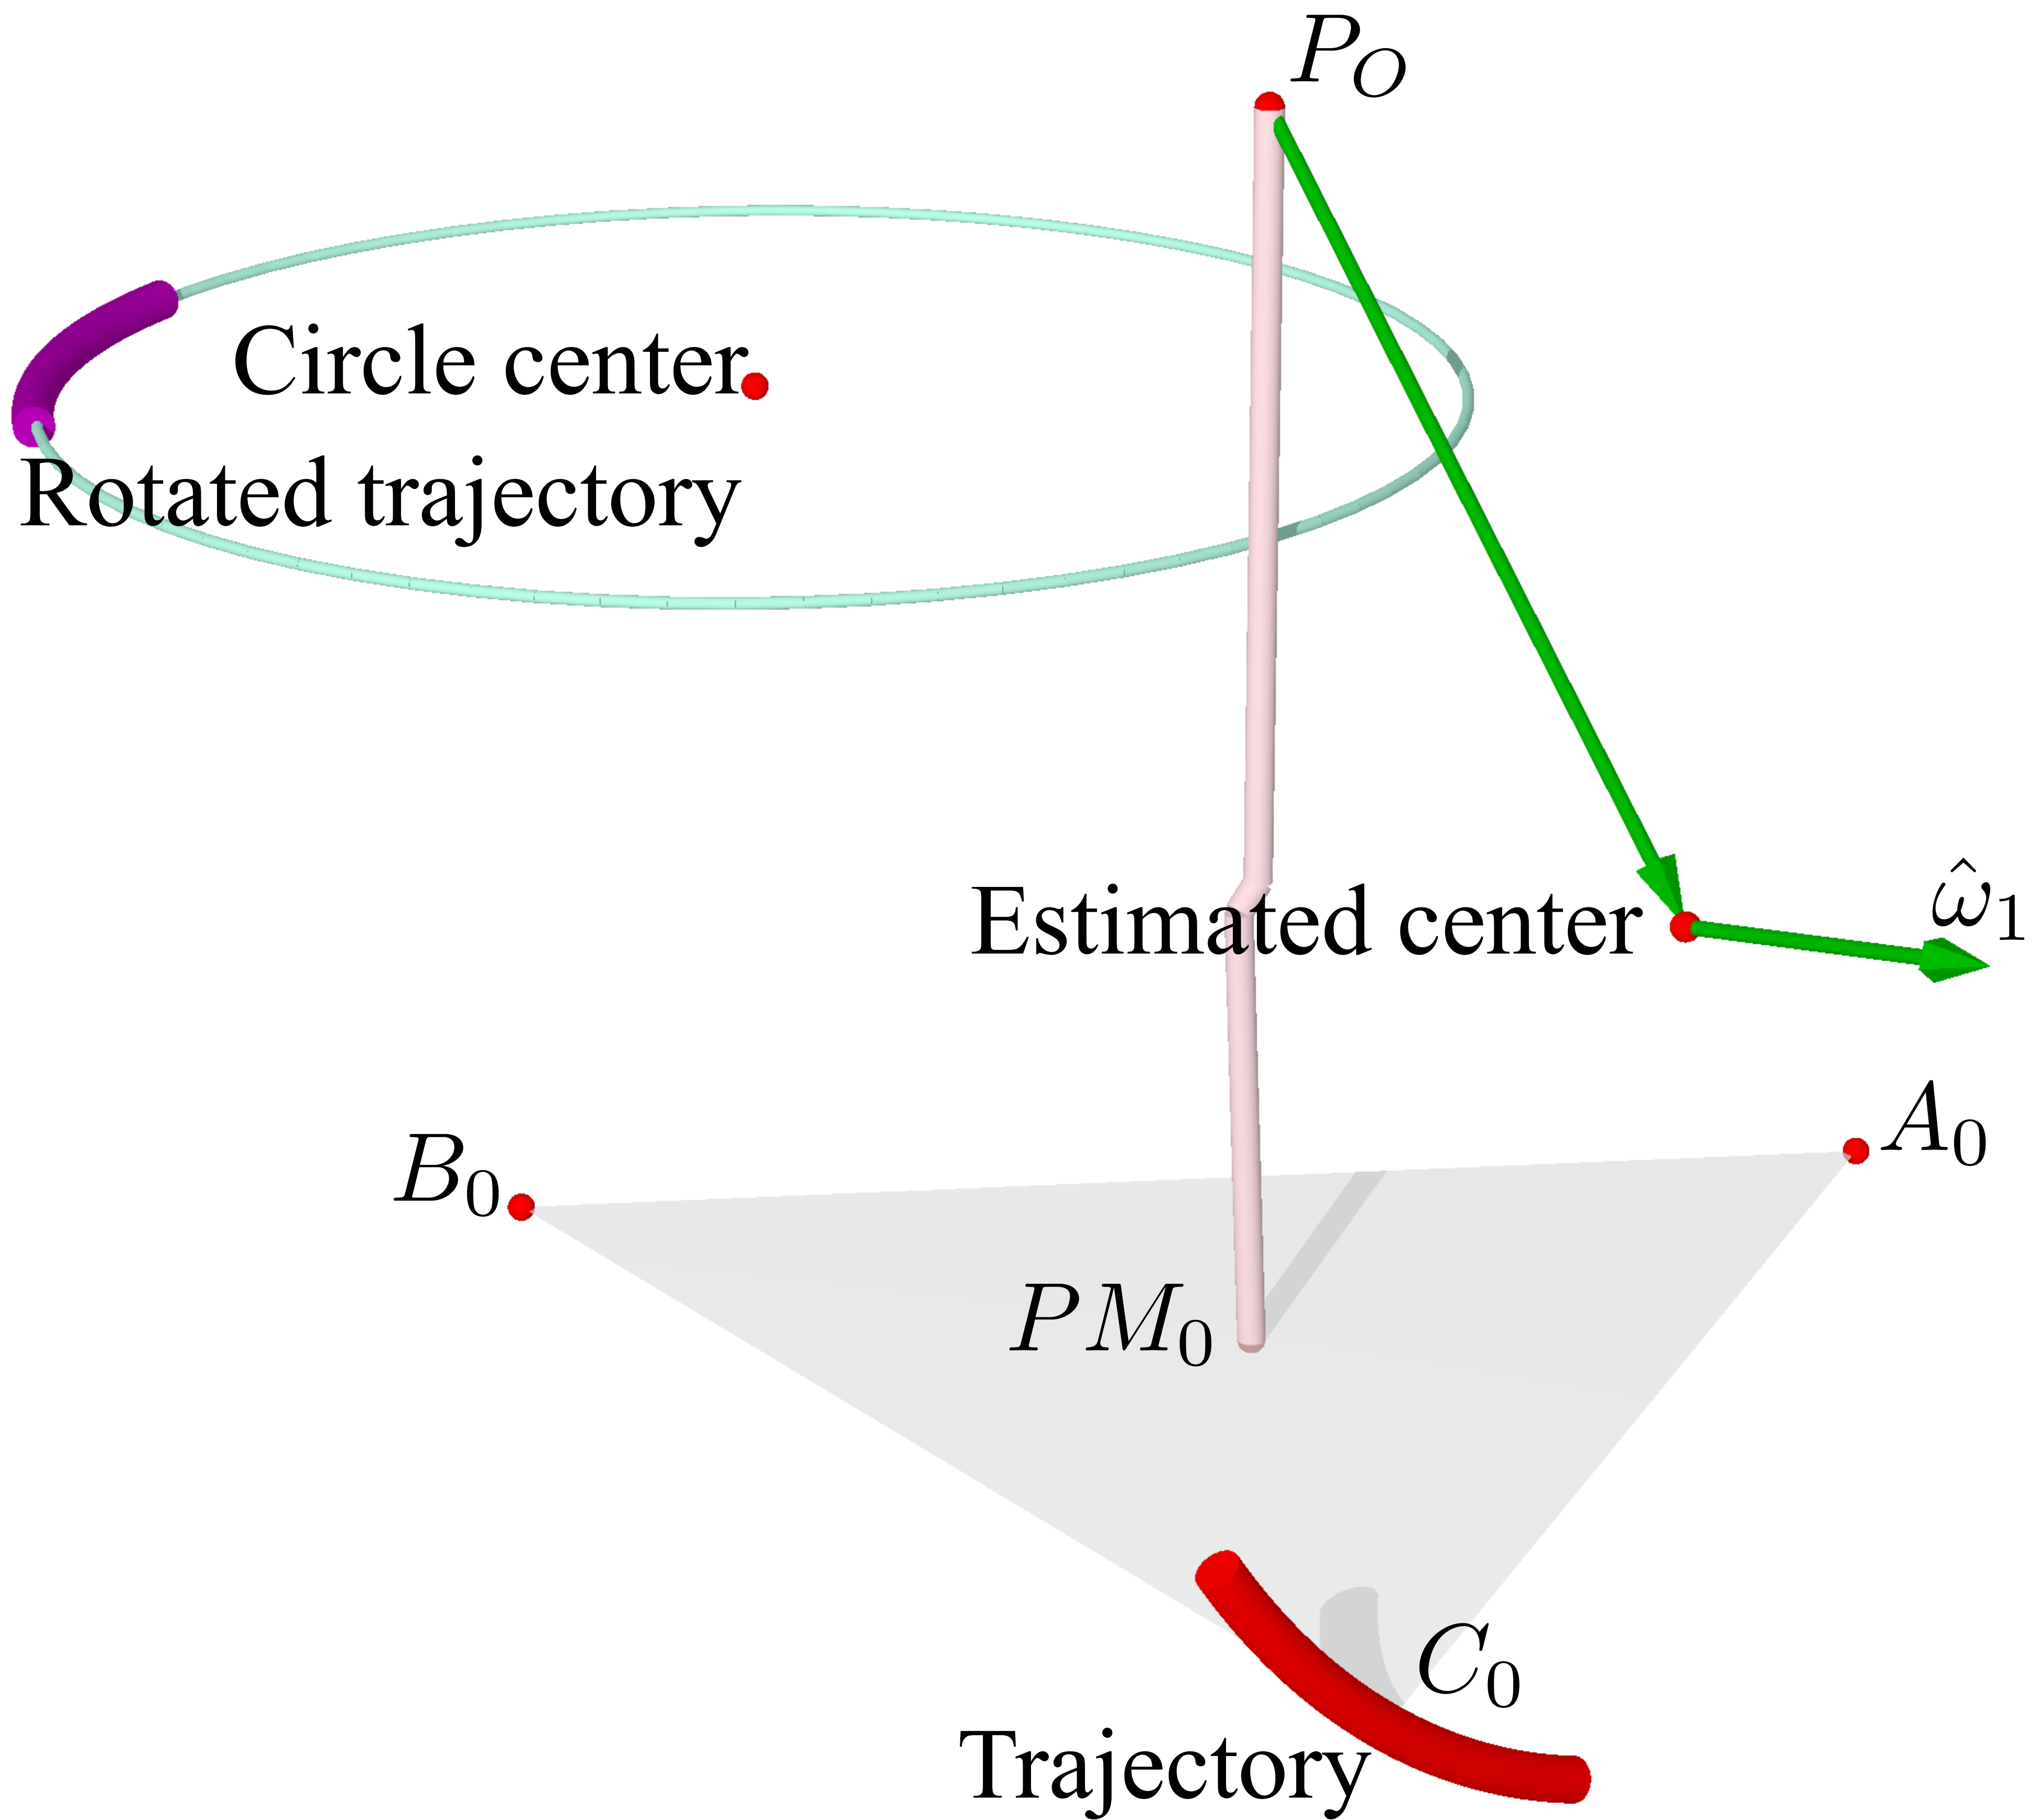

Supplement: s1 [file s1]

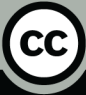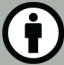

BY

Supplement: s1 [file s1]

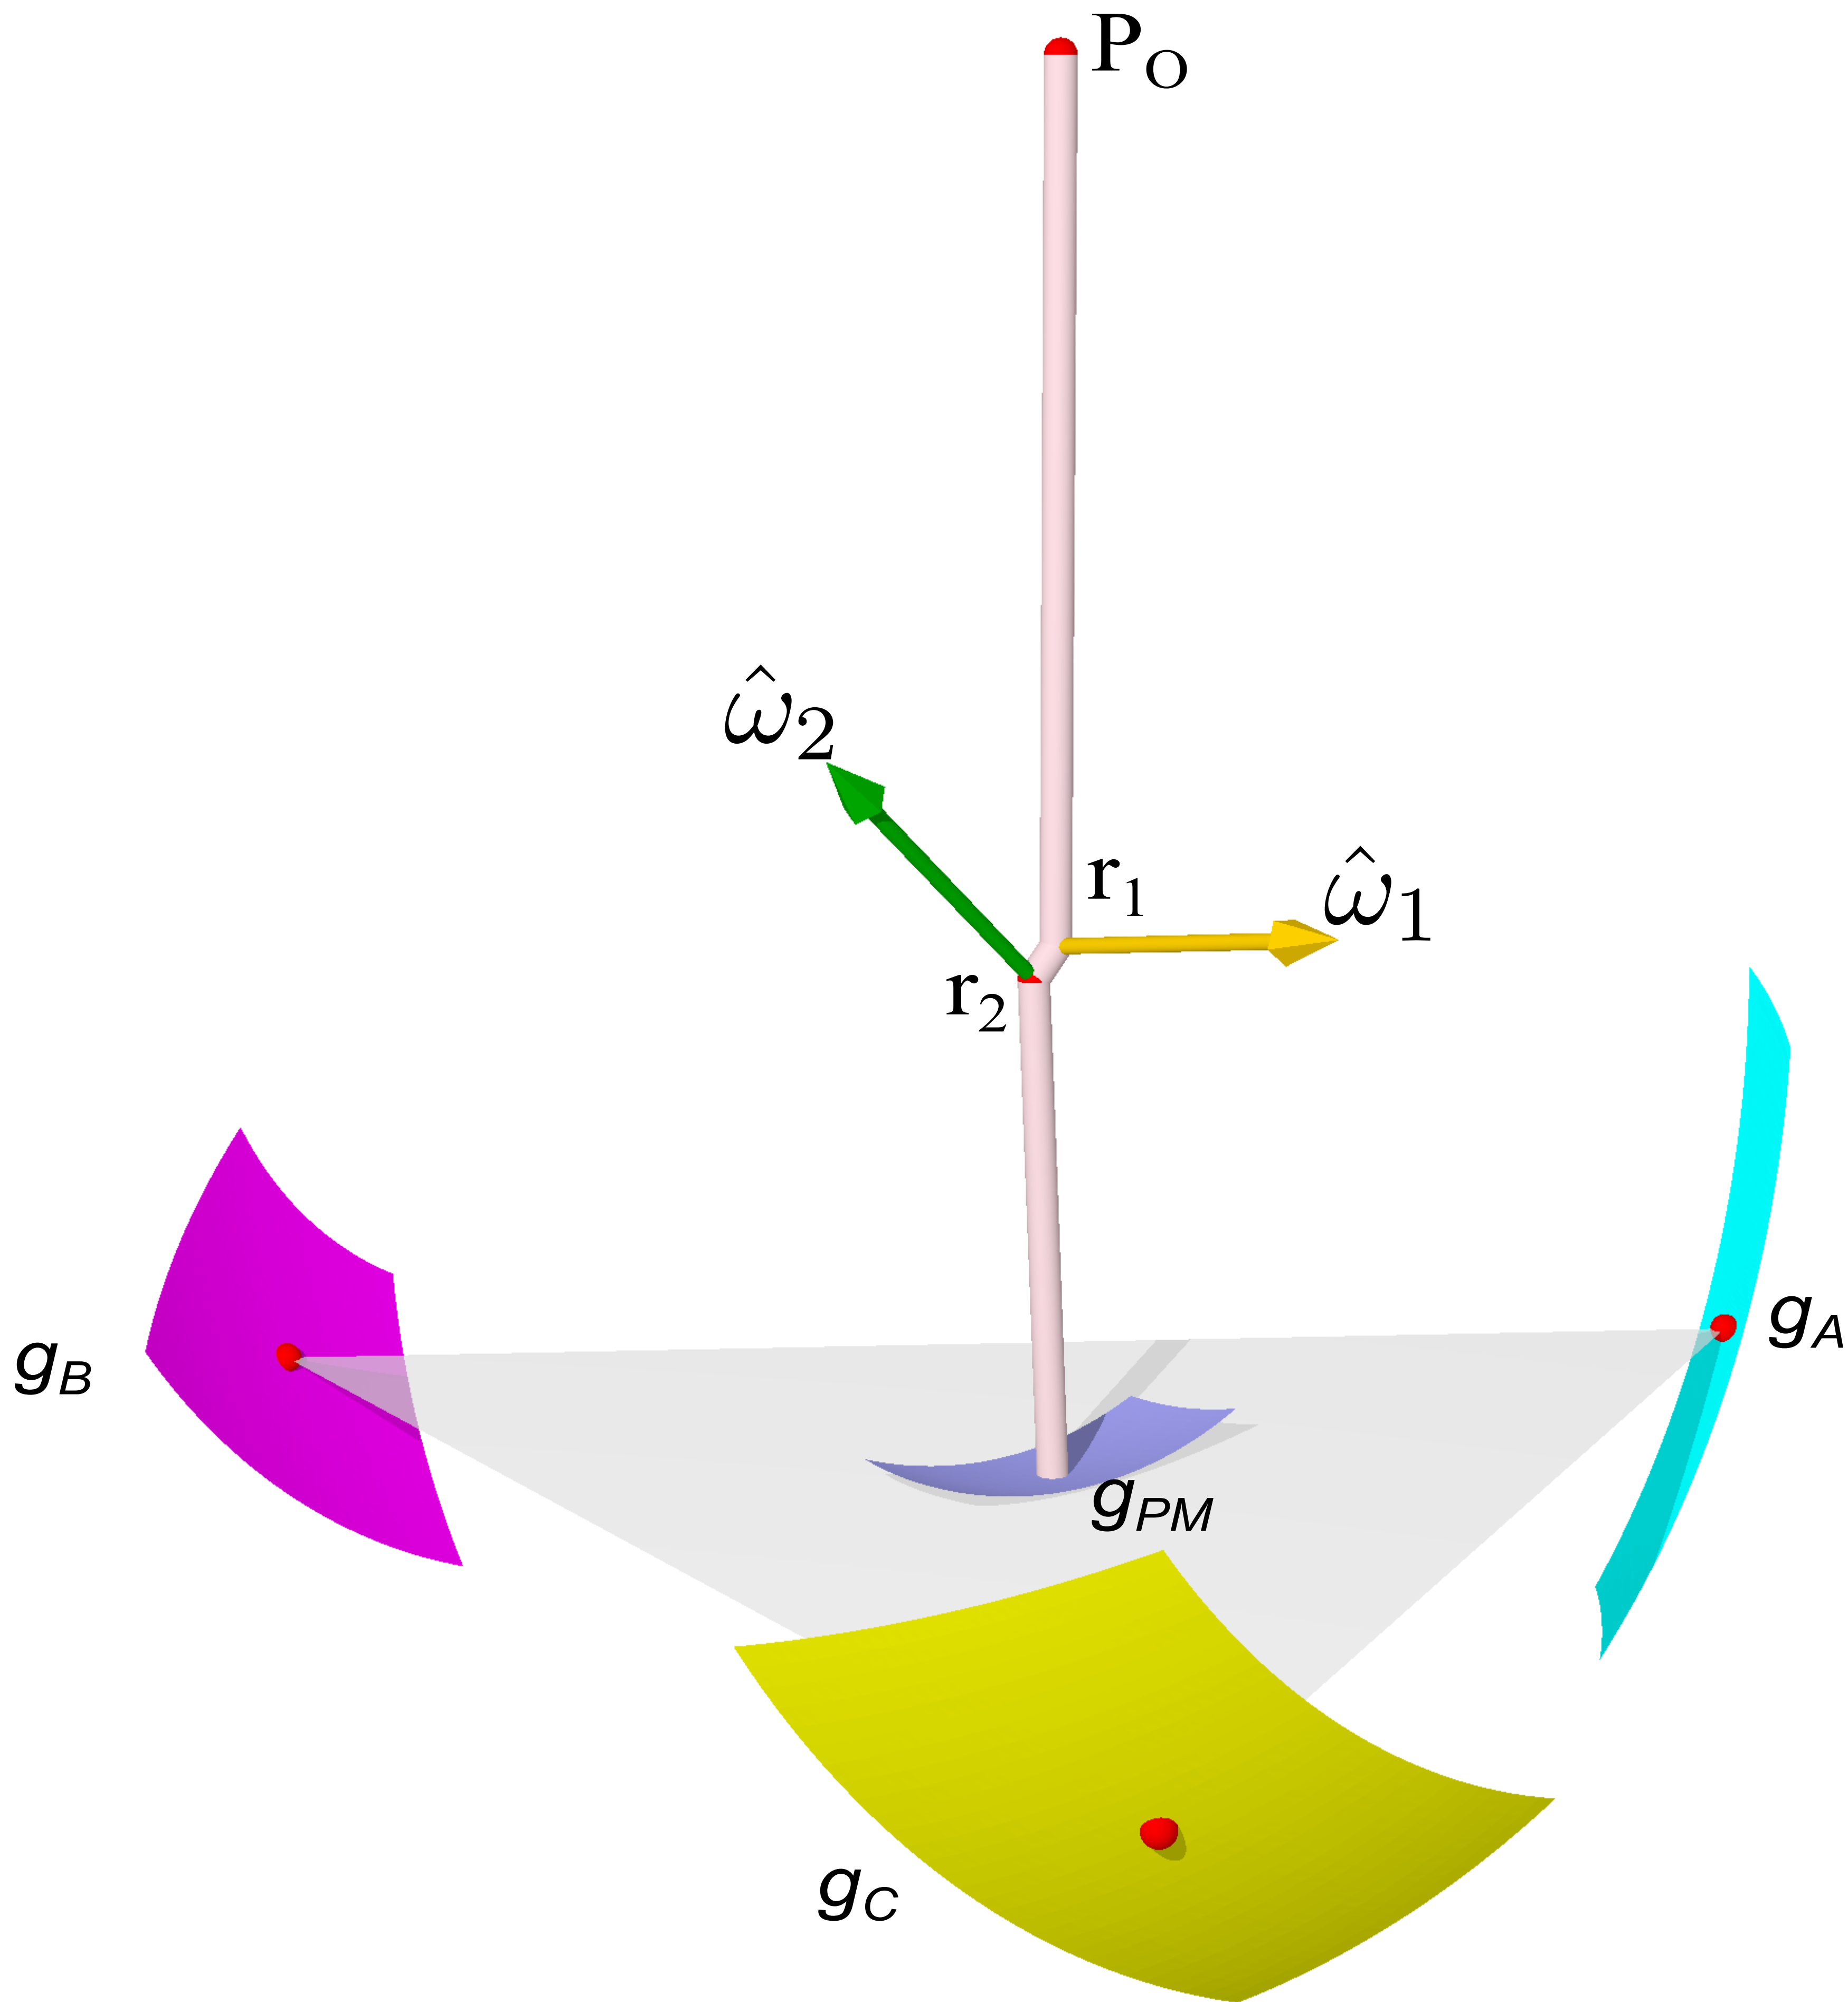

Supplement: s1 [file s1]

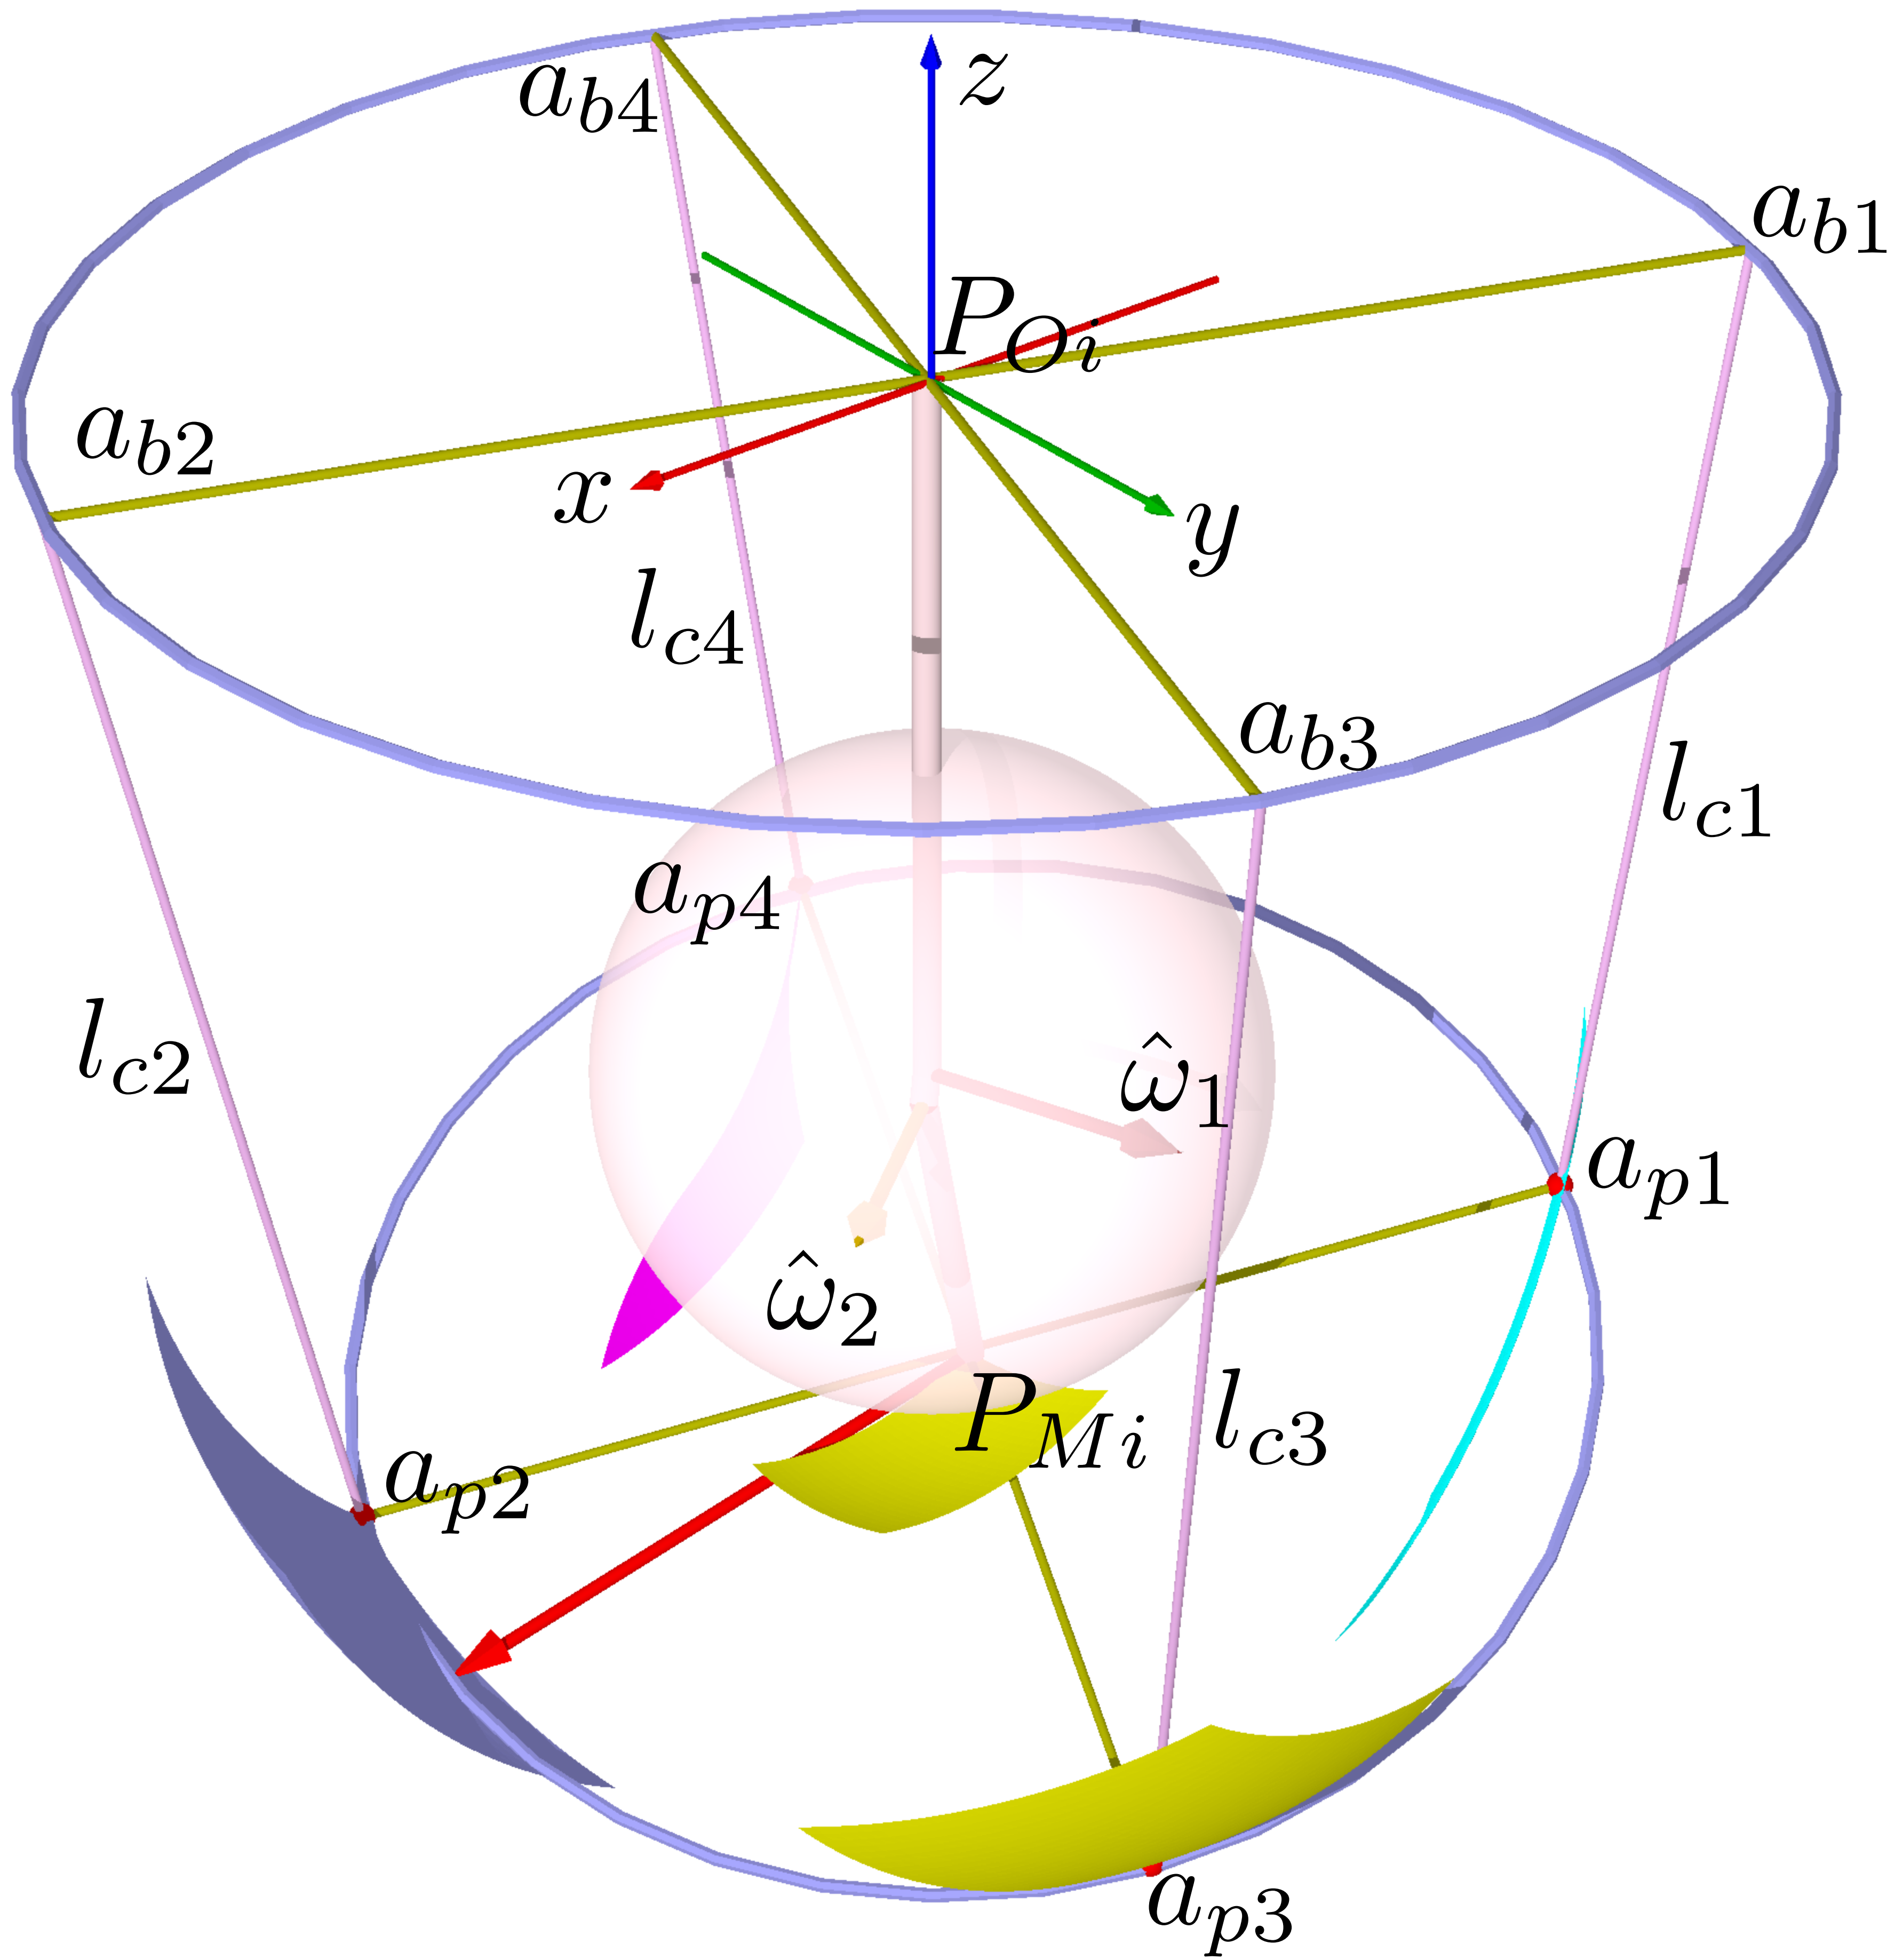

Supplement: s1 [file s1]

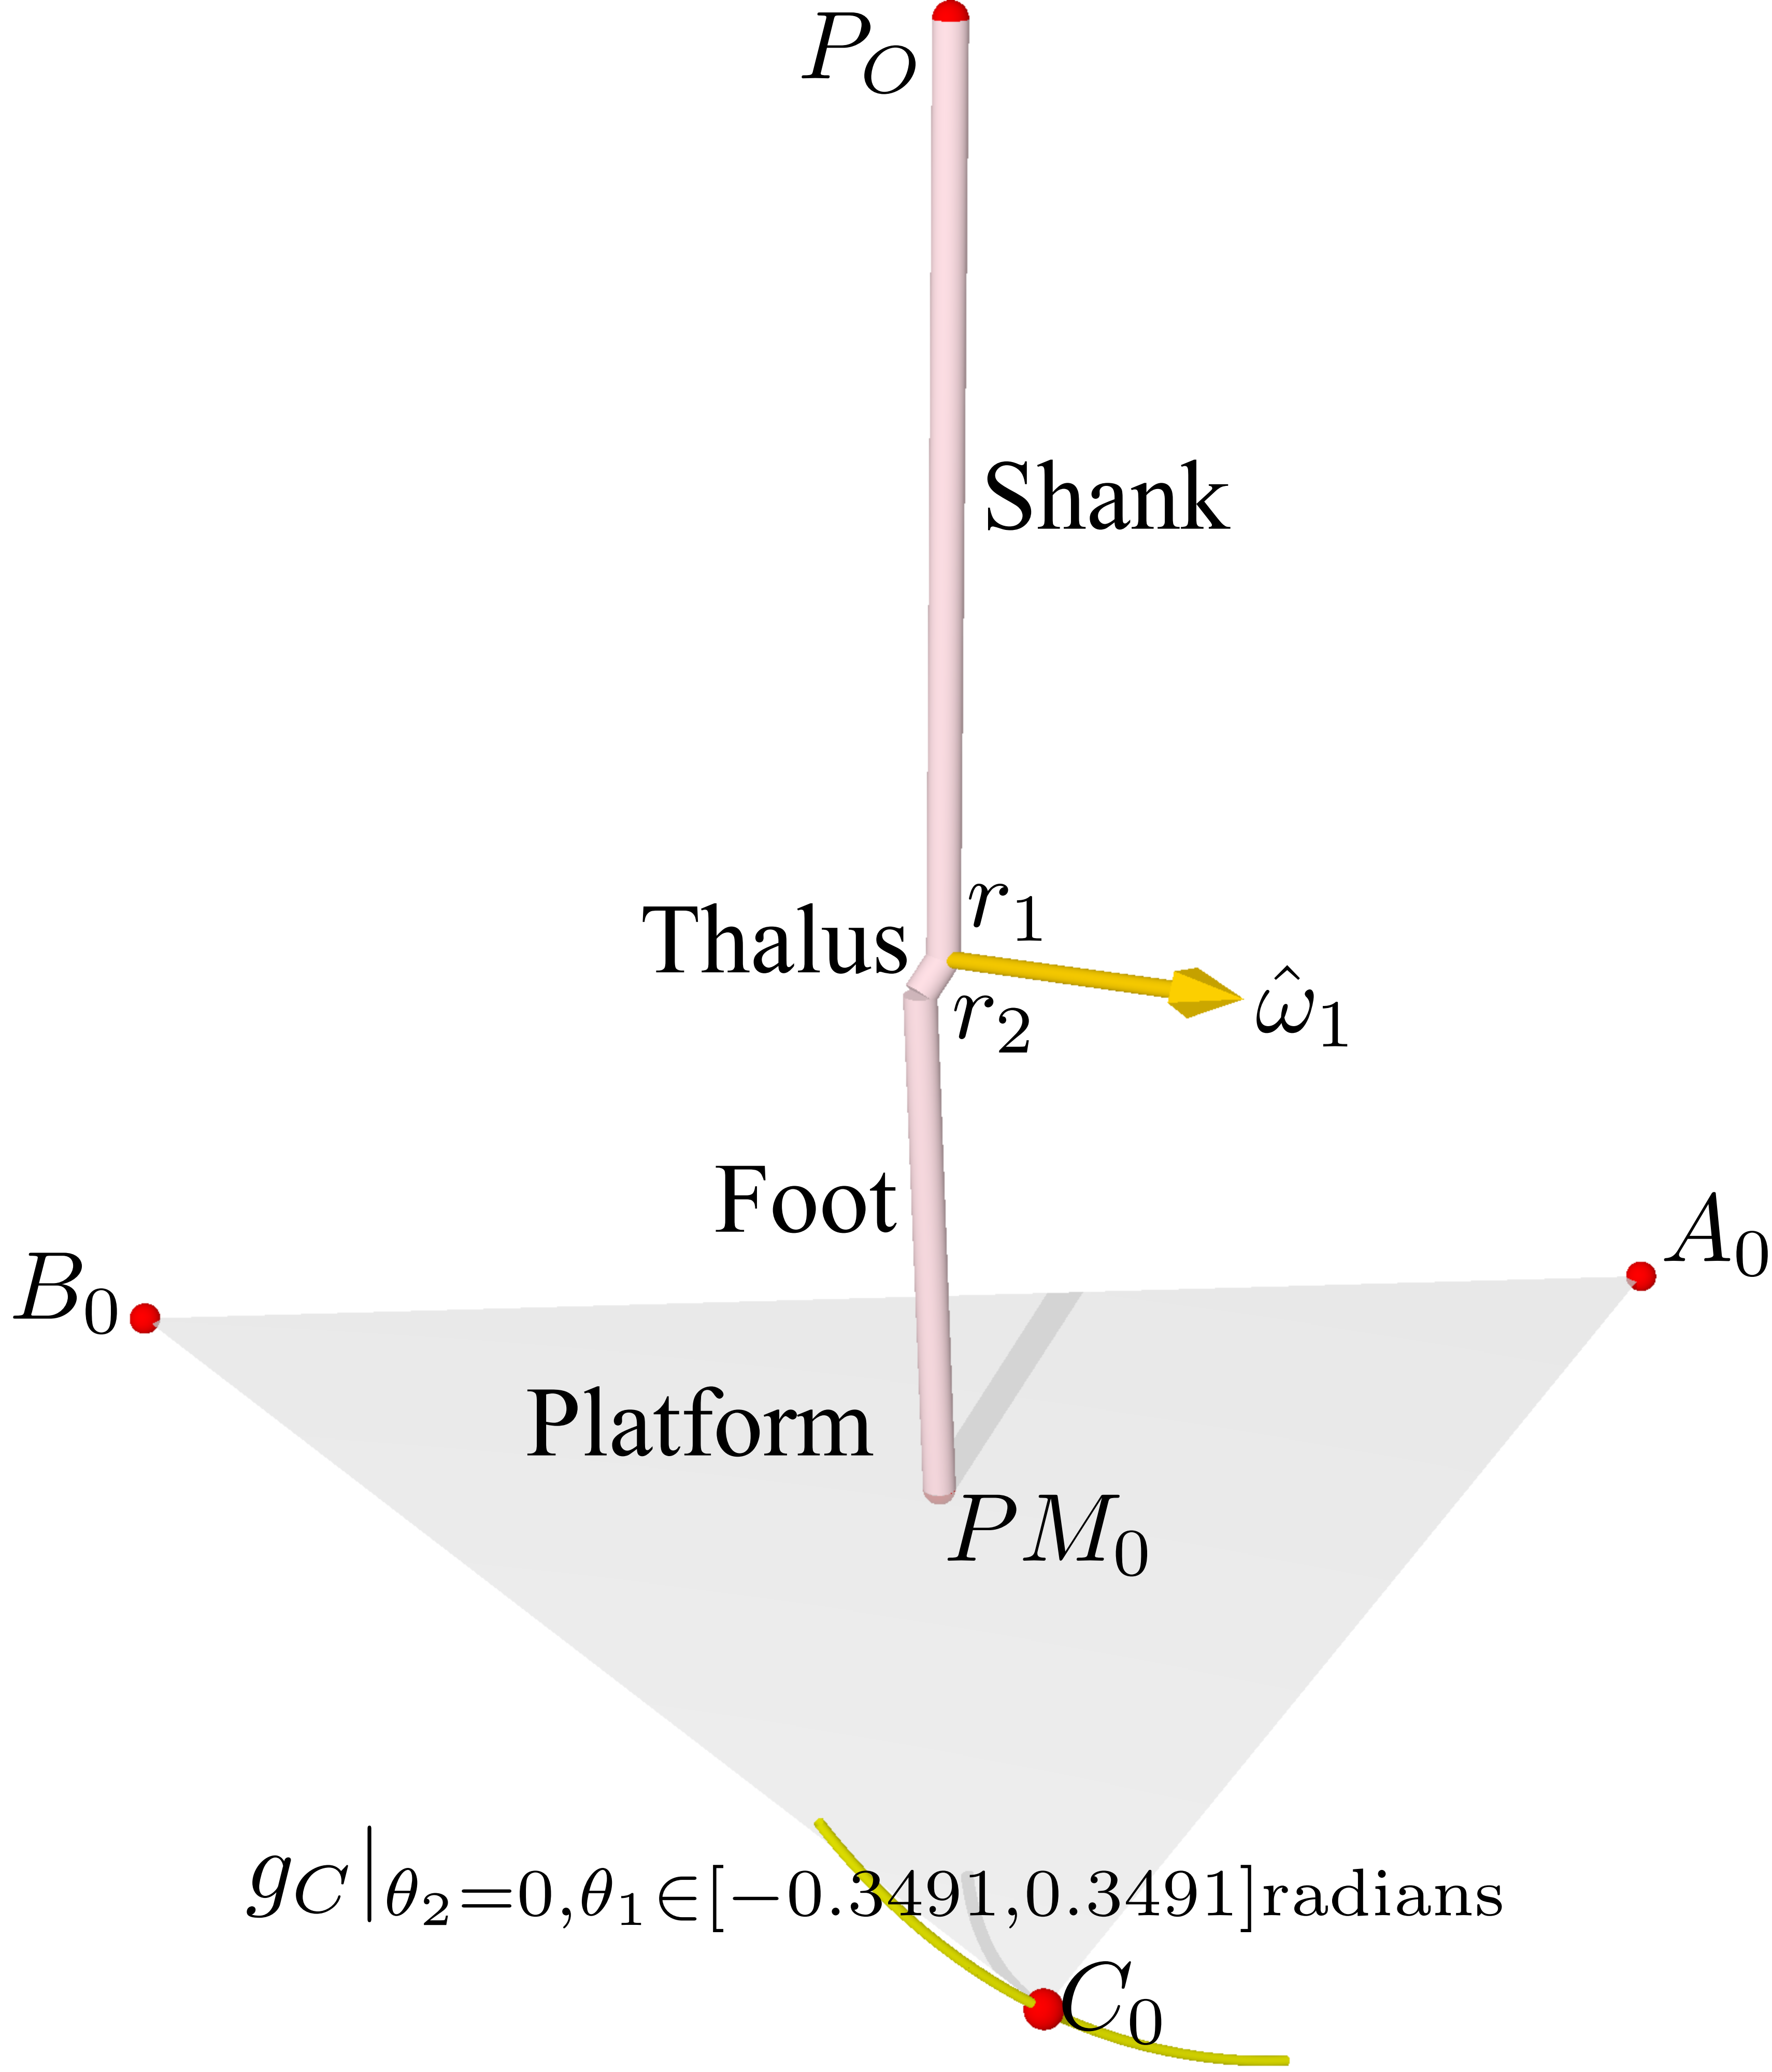

Supplement: s1 [file s1]

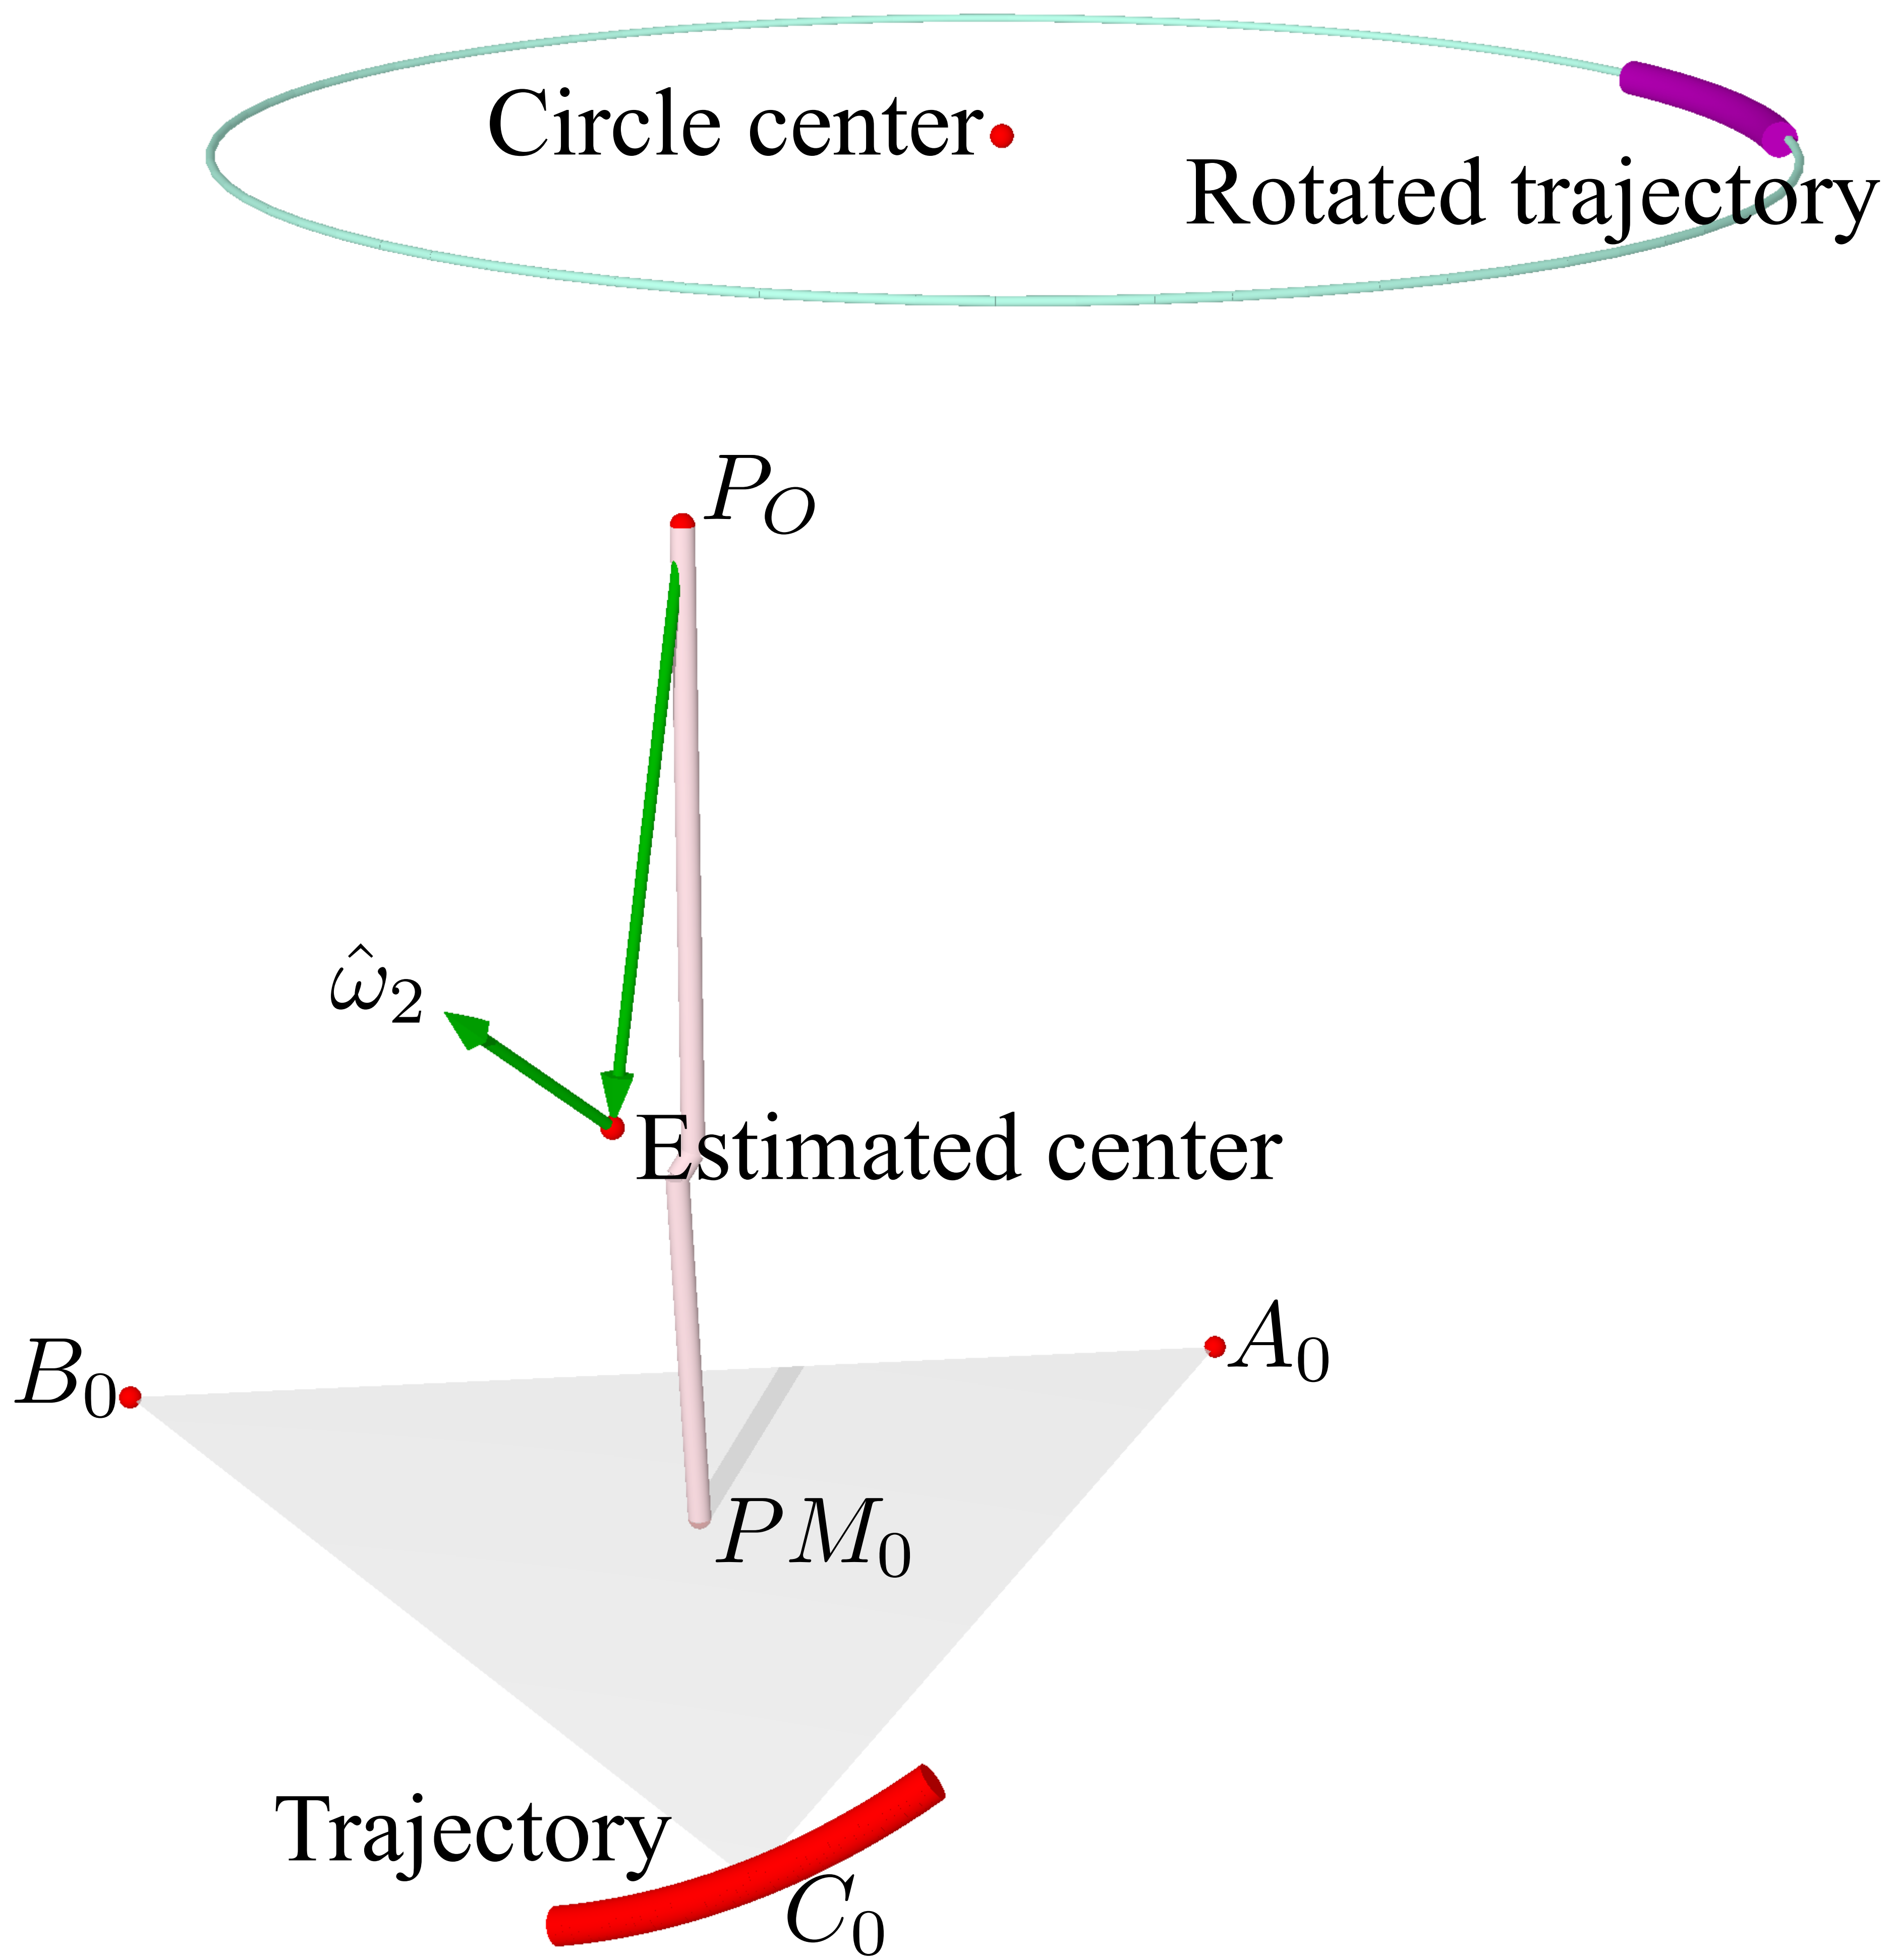

Supplement: s1 [file s1]
